# Supplementary material
Source: PubMed Central journal article supplement (PMC5968508)
Supplement: oc8b00204_si_001.pdf [file oc8b00204_si_001.pdf]

# Catalyst-Controlled Stereodivergent Synthesis of Atropisomeric Multi-Axis Systems

Dominik Lotter, Alessandro Castrogiovanni, Markus Neuburger, Christof Sparr\*

Department of Chemistry, University of Basel, St. Johannis-Ring 19, 4056 Basel, Switzerland

## Table of Contents

|                                                        |                     |
|--------------------------------------------------------|---------------------|
| General Information                                    | page S2             |
| General Procedures                                     | page S2             |
| Catalyst-controlled Stereodivergent Synthesis          |                     |
| With a Bromine End-Group                               | page S3 – page S9   |
| With a Triaryl Amine End-Group                         | page S10 – page S13 |
| NMR Analysis of the Structures in Solution             | page S14            |
| Evaluation of Catalysts and Conditions                 | page S15 – page S22 |
| HPLC Data                                              | page S23 – page S24 |
| X-ray Crystallographic Analysis (Dr. Markus Neuburger) | page S25 – page S26 |
| NMR Data                                               | page S27 – page S45 |
| References                                             | page S46            |

## General Information

All chemicals were reagent grade and used as supplied unless stated otherwise. 2-Iodoxybenzoic acid (IBX) was prepared according to a literature procedure.<sup>[1]</sup> (Z)-4-(2-bromophenyl)but-3-en-1-ol was prepared as previously reported.<sup>[2]</sup> *n*-Dibutylmagnesium solution in heptane was purchased from *Acros* (No. 37777-1000), *n*-butyllithium solution in hexane from *Acros* (No. 18127-1000), citrate buffer solution (pH 5) from *J.T. Baker* (No. 10646631), DMF (peptide synthesis grade) from *Acros* (No. 35483-0010) and chloroform (EtOH-free) from *Sigma Aldrich* (No. C2432). All reactions were carried out in oven dried glassware and under an argon atmosphere. All other solvents used were ACS grade. Extracts were dried over technical grade Na<sub>2</sub>SO<sub>4</sub>. Analytical and preparative thin layer chromatography (TLC) was performed on pre-coated *Merck* silica gel 60 F<sub>254</sub> plates (0.25 mm) and visualized by UV (254 nm). Column chromatography was carried out on *Silicycle* SiliaFlash P60 (230 – 400 mesh). Concentration *in vacuo* was performed by rotary evaporation to ~10 mbar at 40 °C. Final products were dried at ~10<sup>-2</sup> mbar and RT. <sup>1</sup>H NMR and <sup>13</sup>C NMR spectra were recorded on a *BrukerAdvance III* (500 MHz) and *BrukerAvance* (400 MHz) at 298 K in CDCl<sub>3</sub> or C<sub>6</sub>D<sub>6</sub> supplied by *Cambridge Isotope Laboratories*. Chemical shifts (δ) are reported in ppm relative to CDCl<sub>3</sub> (7.26 ppm/77.16 ppm) or C<sub>6</sub>D<sub>6</sub> (7.16 ppm/128.06 ppm). The multiplicities are reported in Hz as: s = singlet, d = doublet and m = multiplet. Melting points (m.p.) were measured on a *Büchi B-545* melting point apparatus and are uncorrected. Infrared (IR) spectra were measured on an ATR *Varian Scimitar 800* FT-IR spectrometer and are reported in cm<sup>-1</sup>. Optical rotations were obtained at RT on a *JASCO P-2000* polarimeter using a 1.00 mL cell with a length of 100 mm; the concentrations are reported in g/100mL. High-resolution ESI mass spectrometry (HR-ESI) was performed by Dr. Heinz Nadig and Dr. Michael Pfeffer of the University of Basel on a *Bruker maXis 4G* QTOF ESI mass spectrometer. High-resolution MALDI mass spectrometry (MALDI-FTICR) was performed by Dr. B. Gerrits, L. Bertschi and O. L. Greter of the ETH Zurich on a *Bruker solariX* mass spectrometer.

## General Procedures

### Preparation of the diol precursors, general procedure A<sup>[2]</sup>

(Z)-4-(2-Bromophenyl)but-3-en-1-ol (**1**, 1.50 eq.) in dry THF was cooled to 0 °C and *n*-Bu<sub>2</sub>Mg (in heptane, 0.78 eq.) was added over 5 min. The solution was stirred at 0 °C for 30 min before *n*-BuLi (in hexanes, 1.56 eq.) was added over 5 min. The mixture was stirred for 1 h at 0 °C, before it was added over 5 min to a solution of a naphthaldehyde (1.00 eq.) in THF (70 mmolL<sup>-1</sup> unless stated otherwise). The mixture was stirred for 25 min at RT and H<sub>2</sub>O (10 mL/mmol) followed by aq. sat. NH<sub>4</sub>Cl (50 mL/mmol) was added. The layers were separated and the aqueous layer was extracted with EtOAc (2x 30 mL/mmol). The combined organic layers were dried over Na<sub>2</sub>SO<sub>4</sub>, filtered and concentrated *in vacuo*. The crude products were purified by column chromatography.

### In situ double oxidation, general procedure B

IBX was added to a suspension of a diol-precursor (1.00 eq.) in MeCN (20 mM) and the suspension was vigorously stirred at 60 °C. The mixture was cooled to RT, filtered and concentrated *in vacuo*. CHCl<sub>3</sub> (20 mmolL<sup>-1</sup>) was added to the residue and the mixture was filtered to yield a solution of the keto-aldehyde, which was directly used in the next step.

# Catalyst-controlled Stereodivergent Synthesis, Bromine End-Group

## 1-Bromo-2-naphthaldehyde (2)

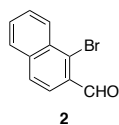

$\text{Co}(\text{OAc})_2 \cdot 4 \text{H}_2\text{O}$  (9.96 g, 40.0 mmol, 20.0 mol%) and 2-butanone (5.37 mL, 60.0 mmol, 30.0 mol%) were added to 1-bromo-2-methylnaphthalene (90%, 34.6 mL, 200 mmol, 1.00 eq.) in acetic acid (400 mL). The solution was heated to 95 °C for 21 h. The mixture was poured on ice (1.5 L), conc. HCl (400 mL) was added and the mixture was extracted with EtOAc (1x 800 mL, 2x 400 mL). The combined organic layers were extracted with aq. NaOH (2.0 molL<sup>-1</sup>, 5x 400 mL). The aqueous extracts were cooled to 0 °C, carefully acidified with conc. HCl (450 mL) and extracted with EtOAc (3x 500 mL). The combined organic layers were dried over Na<sub>2</sub>SO<sub>4</sub>, filtered and concentrated *in vacuo* to yield the crude product which was used without further purification.<sup>[3]</sup>

Crude 1-bromo-2-naphthoic acid (**3**) was dissolved in THF (400 mL), cooled to 0 °C and borane dimethylsulfide in THF (2.0 molL<sup>-1</sup>, 117 mL, 234 mmol, 1.17 eq.) was added over 10 min. The mixture was heated to reflux for 2 h, cooled back to 0 °C and H<sub>2</sub>O (150 mL) was carefully added (gas evolution!). Aq. HCl (1.0 molL<sup>-1</sup>, 50 mL) was added and the mixture was extracted with EtOAc (2x 350 mL). The combined organic layers were washed with brine (100 mL), dried over Na<sub>2</sub>SO<sub>4</sub>, filtered and concentrated *in vacuo*. The crude product was used without further purification.

The crude (1-bromonaphthalene-2-yl)methanol was dissolved in CH<sub>2</sub>Cl<sub>2</sub> (1.5 L) and MnO<sub>2</sub> (174 g, 2.00 mol, 10.0 eq.) was added. The mixture was stirred for 19 h at RT and filtered over Celite®. The Celite® pad was rinsed with CH<sub>2</sub>Cl<sub>2</sub> (2x 150 mL), the combined filtrates were concentrated *in vacuo* and the residue was recrystallized from MeOH (1.2 L, 64 °C to 0 °C) to yield product **2** as a yellowish solid (35.3 g, 150 mmol, 75% over three steps): m.p. 109.0–110.0 °C; *R*<sub>f</sub> 0.32 (*n*-pentane:Et<sub>2</sub>O 50:1);  $\nu_{\text{max}}$  (neat): 3354w, 3059w, 2923w, 2866m, 2742w, 1666s, 1592m, 1554m, 1496w, 1453m, 1308m, 1252s, 1212s, 1209w, 969m, 886m, 808s, 751s, 665m; <sup>1</sup>H NMR (400 MHz, CDCl<sub>3</sub>):  $\delta$  = 10.68 (1H, d, <sup>4</sup>*J* 4.4, CHO), 8.53–8.47 (1H, m), 7.94 (1H, d, <sup>3</sup>*J* 8.5), 7.90–7.83 (2H, m), 7.71–7.66 (2H, m); <sup>13</sup>C NMR (101 MHz, CDCl<sub>3</sub>):  $\delta$  = 193.0 (CHO), 137.4, 132.3, 131.5, 131.3, 129.9, 128.6, 128.4, 128.4, 128.3, 124.2; in agreement with literature data.<sup>[4]</sup> No unexpected or unusually high safety hazards were encountered.

## (Z)-4-(2-((1-bromonaphthalen-2-yl)(hydroxy)methyl)phenyl)but-3-en-1-ol (3, diol A)

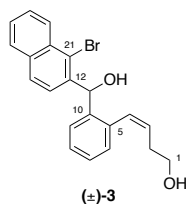

Prepared according to the general procedure A using 1-bromo-2-naphthaldehyde (**2**, 14.1 g, 60.0 mmol, 1.00 eq.), (Z)-4-(2-bromophenyl)but-3-en-1-ol (**1**, 60 mmolL<sup>-1</sup>, 20.4 g, 90.0 mmol, 1.50 eq.), *n*-Bu<sub>2</sub>Mg (0.59 molL<sup>-1</sup>, 80.0 mL, 46.8 mmol, 0.78 eq.) and *n*-BuLi (1.71 molL<sup>-1</sup>, 54.7 mL, 93.6 mmol, 1.56 eq.) to yield a colorless solid (15.1 g, 39.4 mmol, 66%): m.p. 112.5–114.3 °C; *R*<sub>f</sub> 0.19 (*n*-pentane:Et<sub>2</sub>O 1:1);  $\nu_{\text{max}}$  (neat): 3307m, 2922w, 1484w, 1420w, 1328w, 1257w, 1177w, 1035s, 1965m, 897w, 760s, 654m; <sup>1</sup>H NMR (500 MHz, CDCl<sub>3</sub>):  $\delta$  = 8.29 (1H, d, <sup>3</sup>*J* 8.6, C19H), 7.85 (1H, d, <sup>3</sup>*J* 8.6, C14H), 7.83 (1H, d, <sup>3</sup>*J* 8.1, C16H), 7.77 (1H, d, <sup>3</sup>*J* 8.6, C13H), 7.58 (1H, ddd, <sup>3</sup>*J* 8.3, 6.8, <sup>4</sup>*J* 1.4, C18H), 7.52 (1H, ddd, <sup>3</sup>*J* 8.1, 6.9, <sup>4</sup>*J* 1.3, C17H), 7.25 (1H, ddd, <sup>3</sup>*J* 7.5, 7.3, <sup>4</sup>*J* 1.4, C7H), 7.20–7.16 (2H, m, C8H, C6H), 7.10 (1H, dd, <sup>3</sup>*J* 8.5, <sup>4</sup>*J* 1.8, C9H), 6.93 (1H, d, <sup>3</sup>*J* 11.3, C4H), 6.52 (1H, s, C11H), 5.82 (1H, ddd, <sup>3</sup>*J* 11.3, 9.1, 5.9, C3H), 3.67–3.57 (2H, m, C1H<sub>2</sub>), 2.51–2.41 (1H, m, C2H), 2.36 (2H, s, OH), 2.25–2.17 (1H, m, C2H); <sup>13</sup>C NMR (126 MHz, CDCl<sub>3</sub>):  $\delta$  = 140.9 (C10), 140.2 (C12), 136.8 (C5), 134.2 (C15), 132.4 (C20), 130.9 (C4), 130.8 (C3), 129.8 (C9), 128.3 (C16), 127.8 (C14), 127.6 (C7), 127.6 (C8), 127.6 (C18), 127.4 (C19), 127.0 (C6), 126.7 (C17), 125.7 (C13), 123.1 (C21), 72.9 (C11), 62.2 (C1), 31.5 (C2); ESI-MS: *m/z* calcd. for C<sub>21</sub>H<sub>19</sub>OBrNaO<sub>2</sub><sup>+</sup> 405.0461 found 405.0442 [M+Na<sup>+</sup>]. No unexpected or unusually high safety hazards were encountered.

**(Z,R,S<sub>a</sub>)-4-(1'-Bromo-[1:2']-binaphthalen-2-yl(hydroxy)methyl)phenyl)but-3-en-1-ol (6, diol B)**

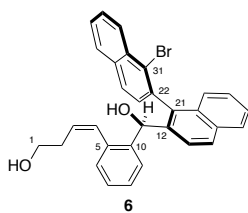

The in situ double-oxidation was performed according to the general procedure **B** using **3** (10.2 g, 26.6 mmol, 1.00 eq.) and IBX (22.3 g, 79.8 mmol, 3.00 eq.) with 4 h reaction time. To the keto-aldehyde solution (*S*)-(-)-5-(2-pyrrolidinyl)-1*H*-tetrazole (925 mg, 6.65 mmol, 25.0 mol%) in DMF (650 mL) and H<sub>2</sub>O (650 mL) was added and the mixture was vigorously stirred at RT for 17 h. The layers were separated and the aq. layer was extracted with CH<sub>2</sub>Cl<sub>2</sub>. The combined organic layers were concentrated at 55 °C. To remove remaining DMF, toluene (1.0 L) was added and the solution was concentrated again. The crude aldol addition product was dissolved in CHCl<sub>3</sub> (1.3 L) and Amberlite® IRA-96 (50.0 g, washed with 2x MeOH and 2x CH<sub>2</sub>Cl<sub>2</sub>) was added. The mixture was stirred for 2 h at RT, filtered, dried over Na<sub>2</sub>SO<sub>4</sub>, filtered again and concentrated to give crude (*S<sub>a</sub>*)-1'-bromo-[1:2']-binaphthalene-2-carbaldehyde, (*S<sub>a</sub>*)-**5**. According to the general procedure **A** crude (*S<sub>a</sub>*)-**5**, was treated with building block **1**, which was prepared from (*Z*)-4-(2-bromophenyl)but-3-en-1-ol (**1**, 60 mmolL<sup>-1</sup>, 9.06 g, 39.9 mmol, 1.50 eq.), *n*-Bu<sub>2</sub>Mg (0.54 M, 38.4 mL, 20.7 mmol, 0.78 eq.) and *n*-BuLi (1.61 M, 25.8 mL, 41.5 mmol, 1.56 eq.) to give after column chromatography (*n*-pentane:Et<sub>2</sub>O 1:1) unreacted aldehyde (*S<sub>a</sub>*)-**5** (1.54 g, 4.27 mmol, 16%) and the desired diol **6** as a colorless solid (7.49 g, 14.7 mmol, 55% over four steps): m.p. 83.1–84.9 °C; *R<sub>f</sub>* 0.19 (*n*-pentane:Et<sub>2</sub>O 1:1); [ $\alpha$ ]<sub>D</sub> +34.6 (*c* 1.0 in CHCl<sub>3</sub>);  $\nu_{\text{max}}$  (neat): 3354m, 3058w, 2924w, 1496w, 1391w, 1321w, 1254w, 1213w, 1045s, 953m, 865w, 818s, 748s; <sup>1</sup>H NMR (500 MHz, CDCl<sub>3</sub>):  $\delta$  = 8.41 (1H, dd, <sup>3</sup>*J* 8.5, <sup>4</sup>*J* 1.1, C29H), 8.00 (1H, d, <sup>3</sup>*J* 8.7, C14H), 7.92 (1H, d, <sup>3</sup>*J* 7.9, C16H), 7.91–7.86 (2H, m, C13H, C26H), 7.68 (1H, ddd, <sup>3</sup>*J* 8.2, 7.0, <sup>4</sup>*J* 1.4, C28H), 7.67 (1H, d, <sup>3</sup>*J* 8.7, C24H), 7.61 (1H, ddd, <sup>3</sup>*J* 8.1, 6.9, <sup>4</sup>*J* 1.2, C27H), 7.47 (1H, ddd, <sup>3</sup>*J* 8.1, 6.9, <sup>4</sup>*J* 1.2, C17H), 7.33–7.28 (2H, m, C9H, C18H), 7.20–7.16 (2H, m, C7H, C8H), 7.14 (1H, dd, <sup>3</sup>*J* 8.6, <sup>4</sup>*J* 1.1, C19H), 6.95–6.92 (1H, m, C6H), 6.87 (1H, d, <sup>3</sup>*J* 8.3, C23H), 5.86 (1H, s, C11H), 5.79 (1H, d, <sup>3</sup>*J* 11.3, C4H), 5.41 (1H, ddd, <sup>3</sup>*J* 11.3, 8.8, 6.2, C3H) 3.43–3.34 (2H, m, C1H), 2.20–2.10 (1H, m, C2H), 2.02 (2H, s br, OH), 1.91–1.84 (1H, m, C2H); <sup>13</sup>C NMR (126 MHz, CDCl<sub>3</sub>):  $\delta$  = 141.4 (C10), 138.3 (C12), 137.5 (C22), 137.3 (C21), 136.3 (C5), 134.0 (C25), 133.1 (C15), 132.5 (C30), 132.0 (C20), 130.5 (C4), 130.0 (C3), 129.4 (C6), 129.3 (C23), 128.5 (C14), 128.4 (C26), 128.2 (C16), 127.9 (C28), 127.8 (C29), 127.7 (C9), 127.4 (C24), 127.3 (C7/8), 127.3 (C7/8), 127.1 (C27), 126.5 (C18), 126.1 (C17), 125.9 (C19), 124.7 (C13), 124.5 (C31), 70.8 (C11), 62.0 (C1), 31.3 (C2); ESI-MS: *m/z* calcd. for C<sub>31</sub>H<sub>25</sub>BrNaO<sub>2</sub><sup>+</sup> 531.0930 found 531.0930 [M+Na<sup>+</sup>]; The e.r. (>99:1) of (*S<sub>a</sub>*)-(1'-bromo-[1,2'-binaphthalen]-2-yl)methanol (obtained by reduction of (*S<sub>a</sub>*)-**5** with NaBH<sub>4</sub>, MeOH, RT, 30 min) was determined by HPLC using a *Chiralcel OD-H* column (1.0 mLmin<sup>-1</sup>, *i*-PrOH:*n*-heptane 10:90): (*S<sub>a</sub>*) *t<sub>R</sub>* = 10.7 min and (*R<sub>a</sub>*) *t<sub>R</sub>* = 18.5 min; racemic reference material was obtained with *rac*-5-(2-pyrrolidinyl)-1*H*-tetrazole as catalyst; This hydroxyl-derivative of (*S<sub>a</sub>*)-**5** decomposed before racemization was observed upon heating in DMF or neat to 170 °C. No unexpected or unusually high safety hazards were encountered.

**(*R<sub>a</sub>*,*S<sub>a</sub>*)-1'-Bromo-[1:2']-ternaphthalene-2-carbaldehyde, (*R<sub>a</sub>*,*S<sub>a</sub>*)-7**

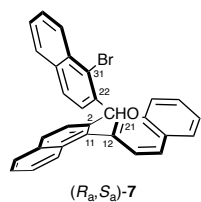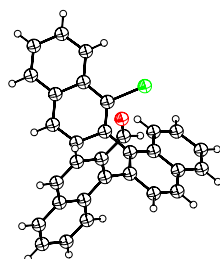

The in situ double-oxidation was performed according to the general procedure **B** using **6** (50.8 mg, 99.7  $\mu$ mol, 1.00 eq.) and IBX (83.8 mg, 299  $\mu$ mol, 3.00 eq.) with 4 h reaction time. To the keto-aldehyde solution at RT was added *N*-benzylcinchonidinium chloride (420  $\mu$ g, 997 nmol, 1.00 mol%), followed by aq. KOH (1.0 molL<sup>-1</sup>, 2.0 mL). The mixture was stirred for 16 h at RT, aq. sat. NH<sub>4</sub>Cl (5.0 mL) and H<sub>2</sub>O (5.0 mL) were added, the layers were separated and the aq. layer was extracted with CH<sub>2</sub>Cl<sub>2</sub> (2x 10 mL). The combined organic layers were dried over Na<sub>2</sub>SO<sub>4</sub>, filtered and concentrated *in vacuo*. Purification by column chromatography (*n*-pentane:CH<sub>2</sub>Cl<sub>2</sub> 4:1 to 1:4) gave the aldol condensation product as colorless solid (33.5 mg, 68.8  $\mu$ mol, 69% over two steps, d.r. = 94:6): m.p. 240.2 °C (decomp.); *R<sub>f</sub>* 0.55 (toluene); [ $\alpha$ ]<sub>D</sub> +498 (*c* 0.5 in CDCl<sub>3</sub>);  $\nu_{\text{max}}$  (neat): 3054w, 2851w, 2361w, 1676s, 1498m, 1385m, 1316m, 1223m, 1145w, 1025w,

950m, 870w, 816s, 754s;  $^1\text{H}$  NMR (500 MHz,  $\text{CDCl}_3$ ):  $\delta$  = 10.26 (1H, d,  $^4J$  0.9, C1H), 8.25 (1H, dd,  $^3J$  8.7,  $^4J$  0.9, C29H), 8.12 (1H, d,  $^3J$  8.3, C14H), 8.08 (1H, d,  $^3J$  8.3, C16H), 7.86 (1H, d,  $^3J$  8.7, C3H), 7.79 (1H, d,  $^3J$  8.6, C6H), 7.70 (1H, d,  $^3J$  8.6, C4H), 7.65 (1H, d,  $^3J$  8.4, C9H), 7.63–7.55 (4H, m, C7H, C13H, C17H, C26H), 7.53 (1H, ddd,  $^3J$  8.3, 7.0,  $^4J$  1.3, C28H), 7.49–7.41 (3H, m, C8H, C18H, C27H), 7.38 (1H, dd,  $^3J$  8.5,  $^4J$  1.0, C19H), 7.29 (1H, d,  $^3J$  8.3, C24H), 7.02 (1H, d,  $^3J$  8.4, C23H);  $^{13}\text{C}$  NMR (126 MHz,  $\text{CDCl}_3$ ):  $\delta$  = 192.7 (C1), 145.6 (C11), 140.0 (C21), 136.7 (C22), 135.9 (C5), 133.6 (C25), 133.3 (C15), 133.0 (C10), 132.5 (C12), 132.1 (C30), 132.0 (C20), 131.5 (C2), 128.7 (C7, C13), 128.5 (C16), 128.4 (C4), 128.4 (C6), 128.3 (C23), 128.2 (C14), 128.0 (C9, C26), 127.8 (C29), 127.7 (C28), 127.3 (C18), 126.9 (C24), 126.9 (C27), 126.8 (C17), 126.7 (C19), 126.7 (C8), 124.8 (C31), 122.1 (C3);  $^1\text{H}$ - $^1\text{H}$  NOESY (500 MHz,  $\text{CDCl}_3$ ) = C9H–C23H, C19H–C23H; MALDI-FTICR:  $m/z$  calcd. for  $\text{C}_{31}\text{H}_{19}\text{BrO}^{+}$  486.0614 found 486.0614 [ $\text{M}^{+}$ ]; Crystals suitable for X-ray crystallographic analysis were obtained by diffusion of *n*-pentane into a solution of (*R*<sub>a</sub>,*S*<sub>a</sub>)-**7** in toluene. Examination of catalysts and conditions can be found on page S16-S18. No unexpected or unusually high safety hazards were encountered.

### (*S*<sub>a</sub>,*S*<sub>a</sub>)-1''-Bromo-[1:2']-ternaphthalene-2-carbaldehyde, (*S*<sub>a</sub>,*S*<sub>a</sub>)-**8**

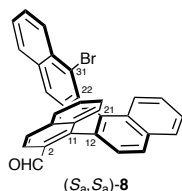

The in situ double-oxidation was performed according to the general procedure **B** using **6** (2.04 g, 4.00 mmol, 1.00 eq.) and IBX (3.36 g, 12.0 mmol, 3.00 eq.) with 4 h reaction time. To the keto-aldehyde solution at RT was added (*S*)-(-)-5-(2-pyrrolidinyl)-1*H*-tetrazole (223 mg, 1.6 mmol, 40.0 mol%) in DMF (133 mL) and citrate buffer (pH 5, 133 mL). The mixture was vigorously stirred at RT for 48 h. The layers were separated and the aq. layer was extracted with  $\text{CH}_2\text{Cl}_2$  (2x 200 mL). The combined organic layers were concentrated *in vacuo* at 55 °C. The residue was dissolved in toluene (300 mL), dried over  $\text{Na}_2\text{SO}_4$ , filtered and concentrated *in vacuo* to remove remaining DMF. The crude aldol condensation product was purified by column chromatography (*n*-pentane: $\text{CH}_2\text{Cl}_2$  4:1 to 1:4) to yield a colorless solid (1.41 g, 2.90 mmol, 72% over two steps, d.r. = 97:3): m.p. 206.8 °C (decomp.);  $R_f$  0.61 (toluene);  $[\alpha]_D^{+230}$  (c 0.5 in  $\text{CDCl}_3$ );  $\nu_{\text{max}}$  (neat): 3056w, 3844w, 2733w, 2361w, 1675s, 1593w, 1499w, 1326m, 1233m, 1147w, 1027w, 950m, 869w, 815s, 749s, 660m;  $^1\text{H}$  NMR (500 MHz,  $\text{CDCl}_3$ ):  $\delta$  = 10.09 (1H, d,  $^4J$  0.8, CHO), 8.11–8.05 (3H, m) 7.98 (1H, d,  $^3J$  8.5), 7.88 (1H, d,  $^3J$  8.5), 7.73–7.68 (3H, m), 7.64–7.59 (3H, m), 7.51–7.41 (4H, m), 7.40–7.34 (2H, m), 7.20 (1H, d,  $^3J$  8.4);  $^{13}\text{C}$  NMR (126 MHz,  $\text{CDCl}_3$ ):  $\delta$  = 192.5 (CHO), 145.7, 140.0, 136.7, 136.0, 133.5, 133.4, 132.5, 132.3, 132.1, 132.0, 131.4, 129.6, 129.0, 128.9, 128.8, 128.5, 128.4, 128.2, 128.1, 127.9, 127.7, 127.6, 127.4, 127.3, 126.9, 126.8, 126.8, 126.3, 125.2, 121.7; MALDI-FTICR:  $m/z$  calcd. for  $\text{C}_{31}\text{H}_{19}\text{BrO}^{+}$  486.0614 found 486.0614 [ $\text{M}^{+}$ ]. Examination of catalysts and conditions can be found on page S16-S18. No unexpected or unusually high safety hazards were encountered.

### (*Z*,*R*,*S*<sub>a</sub>,*S*<sub>a</sub>)-4-(1''-Bromo-[1:2']-ternaphthalen-2-yl(hydroxy)methyl)phenyl)but-3-en-1-ol (diol C)

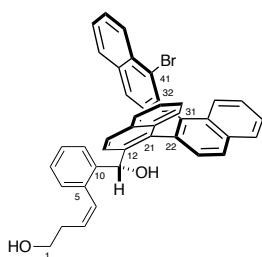

Prepared according to the general procedure **A** using (*S*<sub>a</sub>,*S*<sub>a</sub>)-**8** (1.40 g, 2.87 mmol, 1.00 eq.), (*Z*)-4-(2-bromophenyl)but-3-en-1-ol (**1**, 60 mmolL<sup>-1</sup>, 978 mg, 4.31 mmol, 1.50 eq.), *n*-Bu<sub>2</sub>Mg (0.55 molL<sup>-1</sup>, 4.07 mL, 2.24 mmol, 0.78 eq.) and *n*-BuLi (1.49 molL<sup>-1</sup>, 3.00 mL, 4.48 mmol, 1.56 eq.) to yield after purification by column chromatography ( $\text{CH}_2\text{Cl}_2$ :Et<sub>2</sub>O 100:1 to 10:1) a colorless solid (1.37 g, 2.15 mmol, 75%): m.p. 188.8 °C (decomp.);  $R_f$  0.13 ( $\text{CH}_2\text{Cl}_2$ :Et<sub>2</sub>O 50:1);  $[\alpha]_D^{+83.8}$  (c 1.0 in  $\text{CDCl}_3$ );  $\nu_{\text{max}}$  (neat): 3281w, 3056w, 2900w, 1498w, 1391w, 1315w, 1214w, 1030m, 864w, 820m, 744s, 663w;  $^1\text{H}$  NMR (500 MHz,  $\text{CDCl}_3$ ):  $\delta$  = 8.10 (1H, d,  $^3J$  8.4), 7.98 (1H, d,  $^3J$  8.4), 7.93 (1H, d,  $^3J$  8.7), 7.77–7.71 (3H, m), 7.64 (1H, d,  $^3J$  7.8), 7.57–7.53 (2H, m), 7.50 (1H, d,  $^3J$  8.4), 7.40 (1H, ddd,  $^3J$  8.3, 7.0,  $^4J$  1.4), 7.31–7.25 (3H, m), 7.25–7.18 (4H, m), 7.14 (1H, ddd,  $^3J$  8.7, 7.1,

<sup>4</sup>J 1.1), 7.06 (1H, dd, <sup>3</sup>J 7.7, <sup>4</sup>J 1.1), 7.01 (1H, d, <sup>3</sup>J 7.4), 6.74 (1H, d, <sup>3</sup>J 8.4), 6.18 (1H, s, C11H), 5.73 (1H, d, <sup>3</sup>J 11.6, C4H), 5.46–5.39 (1H, m, C3H), 3.57–3.50 (1H, m, C1H), 3.47 (2H, OH), 3.27–3.20 (1H, m, C1H), 2.34–2.22 (1H, m, C2H), 1.91–1.82 (1H, m, C2H); <sup>13</sup>C NMR (126 MHz, CDCl<sub>3</sub>): δ = 141.8, 138.0, 137.8, 137.2, 137.0, 136.1, 135.2, 133.4, 132.9, 132.6, 132.2, 132.2, 132.1, 131.5, 130.5, 129.6, 129.2, 128.5, 128.4, 128.4, 128.2, 128.0, 127.8, 127.6, 127.6, 127.5 (3C, HMQC), 127.4, 127.2, 126.9, 126.8, 126.5, 126.2, 125.7, 125.4, 125.1, 124.3, 70.7, 61.3, 30.9; since diol **C** slowly decomposes in chloroform, additional NMR in C<sub>6</sub>D<sub>6</sub> were recorded: <sup>1</sup>H NMR (500 MHz, C<sub>6</sub>D<sub>6</sub>): δ = 8.26 (1H, d, <sup>3</sup>J 8.9, C13H), 8.16 (1H, dd, <sup>3</sup>J 8.6, <sup>4</sup>J 0.7, C39H), 8.03 (1H, dd, <sup>3</sup>J 8.4, <sup>4</sup>J 0.6, C19H), 7.92 (1H, d, <sup>3</sup>J 8.5, C33H), 7.70 (1H, d, <sup>3</sup>J 8.2, C26H), 7.59 (1H, d, <sup>3</sup>J 8.6, C14H), 7.48–7.44 (2H, m, C24H, C34H), 7.42–7.36 (3H, m, C9H, C16H, C29H), 7.26 (1H, ddd, <sup>3</sup>J 8.0, 6.9, <sup>4</sup>J 0.9, C27H), 7.18 (1H, ddd, <sup>3</sup>J 8.4, 7.0, <sup>4</sup>J 1.4, C18H), 7.12–6.97 (6H, m, C6H, C7H, C8H, C17H, C28H, C38H), 6.85–6.80 (3H, m, C23H, C36H, C37H), 6.52 (1H, s, C11H), 5.83 (1H, d, <sup>3</sup>J 11.6, C4H), 5.22–5.16 (1H, m, C3H), 3.19–3.13 (1H, m, C1H), 2.92–2.85 (1H, m, C1H), 2.27–2.16 (1H, m, C2H), 1.53–1.45 (1H, m, C2H); <sup>13</sup>C NMR (126 MHz, C<sub>6</sub>D<sub>6</sub>): δ = 143.0 (C10), 138.8 (C12), 138.4 (C31), 137.8 (C5), 137.5 (C32), 136.7 (C21), 135.8 (C22), 133.8 (C35), 133.3 (C25), 133.0 (C10), 132.8 (C30), 132.7 (C20), 132.5 (C40), 132.2 (C3), 130.6 (C4), 129.9 (C6), 129.4 (C23), 129.0 (C9), 128.9 (C33), 128.7 (C19), 128.4 (C26), 127.8 (C8), 127.7 (C39), 127.5 (C7), 127.4 (C38), 127.3 (C29), 127.2 (C28), 126.6 (C37), 126.3 (C27), 126.0 (C17), 125.8 (C18), 125.5 (C41), 124.8 (C13), 71.0 (C11), 61.0 (C1), 61.1 (C2); ESI-MS: m/z calcd. for C<sub>41</sub>H<sub>31</sub>OBrNaO<sub>2</sub><sup>+</sup> 657.1400 found 657.1409 [M+Na<sup>+</sup>]. No unexpected or unusually high safety hazards were encountered.

**(R<sub>a</sub>,S<sub>a</sub>,S<sub>a</sub>)-1'''-Bromo-[1:2']-quaternaphthalene-2-carbaldehyde, (R<sub>a</sub>,S<sub>a</sub>,S<sub>a</sub>)-13**

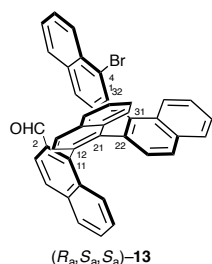

The in situ double-oxidation was performed according to the general procedure **B** using diol **C** (48.3 mg, 75.9 μmol, 1.00 eq.), IBX (106 mg, 380 μmol, 5.00 eq.) and 4.5 h reaction time. To the keto-aldehyde solution aq. KOH (1.0 molL<sup>-1</sup>, 2.0 mL) was added. The mixture was stirred for 16 h at RT, aq. sat. NH<sub>4</sub>Cl (5.0 mL) and H<sub>2</sub>O (5.0 mL) were added, the layers were separated and the aq. layer was extracted with CH<sub>2</sub>Cl<sub>2</sub> (2x 10 mL). The combined organic layers were dried over Na<sub>2</sub>SO<sub>4</sub>, filtered and concentrated *in vacuo*. Purification by column chromatography (*n*-pentane:CH<sub>2</sub>Cl<sub>2</sub> 4:1 to 1:4) yielded the aldol condensation product as colorless solid (25.7 mg, 41.9 μmol, 55% over two steps, d.r. = 87:13); m.p. 240.4 °C (decomp.); R<sub>f</sub> 0.34 (*n*-pentane:CH<sub>2</sub>Cl<sub>2</sub> 1:1); [α]<sub>D</sub> -264 (*c* 1.0 in CDCl<sub>3</sub>); ν<sub>max</sub> (neat): 3056w, 2855w, 1685m, 1500w, 1316w, 1228m, 1032w, 951w, 870w, 818s, 745s, 670m; <sup>1</sup>H NMR (500 MHz, CDCl<sub>3</sub>): δ = 8.59 (1H, d, <sup>4</sup>J 0.9, C1H), 8.04 (1H, d, <sup>3</sup>J 8.3, C39H), 7.94 (1H, d, <sup>3</sup>J 8.6, C3H), 7.93–7.90 (2H, m, C16H, C19H), 7.85–7.82 (3H, m, C4H, C14H, C36H), 7.80–7.75 (3H, m, C23H, C24H, C26H), 7.73–7.70 (2H, m, C6H, C9H), 7.58–7.46 (4H, m, C17H, C34H, C37H, C38H), 7.46–7.40 (2H, m, C7H, C18H), 7.38 (1H, ddd, <sup>3</sup>J 8.1, 6.9, <sup>4</sup>J 1.1, C27H), 7.33 (1H, ddd, <sup>3</sup>J 8.2, 6.9, <sup>4</sup>J 1.4, C8H), 7.18–7.13 (2H, m, C13H, C28H), 6.83 (1H, d, <sup>3</sup>J 8.5, C29H), 6.01 (1H, d, <sup>3</sup>J 8.3, C33H); <sup>13</sup>C NMR (126 MHz, CDCl<sub>3</sub>): δ = 192.2 (C1), 145.7 (C11), 139.1 (C31), 139.0 (C21), 137.1 (C32), 135.6 (C5), 134.9 (C22), 133.8 (C35), 133.7 (C15), 133.4 (C20), 133.2 (C2), 132.8 (C25), 132.8 (C30), 132.3 (C23), 131.9 (C40), 131.6 (C12), 131.2 (C33), 131.0 (C10), 130.8 (C13), 129.6 (C19), 128.9 (C9), 128.6 (C4), 128.5 (C7), 128.3 (C36), 128.2 (C6), 128.0 (C14, C16), 127.9 (C26), 127.8 (C39), 127.6 (C38), 127.2 (C34), 127.2 (C37), 126.8 (C24), 126.6 (C17), 126.5 (C29), 126.3 (C28), 126.2 (C27), 126.1 (C8), 126.0 (C18), 125.4 (C41), 122.6 (C3); MALDI-FTICR: m/z calcd. for C<sub>41</sub>H<sub>25</sub>BrO<sup>+</sup> 612.1083 found 612.1084 [M<sup>+</sup>]. Examination of catalysts and conditions can be found on page S18-S21. No unexpected or unusually high safety hazards were encountered.

**(*S<sub>a</sub>*,*S<sub>a</sub>*,*S<sub>a</sub>*)-1'''-Bromo-[1:2']-quaternaphthalene-2-carbaldehyde, (*S<sub>a</sub>*,*S<sub>a</sub>*,*S<sub>a</sub>*)-14**

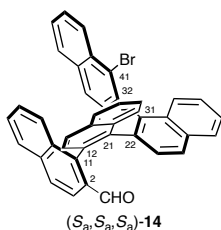

The in situ double-oxidation was performed according to the general procedure **B** using diol **C** (47.2 mg, 74.3  $\mu\text{mol}$ , 1.00 eq.), IBX (104 mg, 372  $\mu\text{mol}$ , 5.00 eq.) and 4.5 h reaction time. The keto-aldehyde solution was cooled to 0 °C and *N*-benzylcinchonium chloride (313  $\mu\text{g}$ , 743 nmol, 1.00 mol%) was added, followed by cold aq. KOH (1.0 molL<sup>-1</sup>, 2.0 mL). The mixture was stirred for 16 h at 0 °C, aq. sat. NH<sub>4</sub>Cl (5.0 mL) and H<sub>2</sub>O (5.0 mL) were added, the layers were separated and the aq. layer was extracted with CH<sub>2</sub>Cl<sub>2</sub> (2x 10 mL). The combined organic layers were dried over Na<sub>2</sub>SO<sub>4</sub>, filtered and concentrated *in vacuo*. Purification by column chromatography (*n*-pentane:CH<sub>2</sub>Cl<sub>2</sub> 4:1 to 1:4) gave the aldol condensation product (*S<sub>a</sub>*,*S<sub>a</sub>*,*S<sub>a</sub>*)-**14** as colorless solid (25.5 mg, 41.5  $\mu\text{mol}$ , 56% over two steps, d.r. = 89:11). Diastereomerically pure material was obtained by reduction using NaBH<sub>4</sub>, separation by preparative TLC (CH<sub>2</sub>Cl<sub>2</sub>) and reoxidation with Dess-Martin periodinane followed by column chromatography (*n*-pentane:CH<sub>2</sub>Cl<sub>2</sub> 4:1 to 1:4) to yield a colorless solid: m.p. 206.0 °C (decomp.); *R<sub>f</sub>* 0.34 (*n*-pentane:CH<sub>2</sub>Cl<sub>2</sub> 1:1); [ $\alpha$ ]<sub>D</sub> -546 (*c* 0.5 in CDCl<sub>3</sub>);  $\nu_{\text{max}}$  (neat): 3055w, 2853w, 2361w, 1694s, 1679s, 1596w, 1501w, 1425w, 1385w, 1313m, 1033w, 908m, 823s, 747s, 741s; <sup>1</sup>H NMR (500 MHz, CDCl<sub>3</sub>):  $\delta$  = 9.96 (1H, d, <sup>3</sup>*J* 0.8, C1H), 8.01–7.97 (2H, m, C24H, C39H), 7.94 (1H, d, <sup>3</sup>*J* 8.1, C23H), 7.91 (1H, d, <sup>3</sup>*J* 8.0, C26H), 7.89 (1H, d, <sup>3</sup>*J* 8.5, C19H), 7.87 (1H, d, <sup>3</sup>*J* 8.9, C14H), 7.84 (1H, d, <sup>3</sup>*J* 7.8, C6H), 7.82 (1H, d, <sup>3</sup>*J* 8.7, C4H), 7.76 (1H, d, <sup>3</sup>*J* 8.4, C3H), 7.60 (1H, d, <sup>3</sup>*J* 8.6, C23H), 7.57 (1H, ddd, <sup>3</sup>*J* 8.1, 7.0, <sup>4</sup>*J* 1.1, C17H), 7.45–7.38 (4H, m, C18H, C27H, C37H, C38H), 7.37–7.33 (2H, m, C7H, C36H), 7.28 (1H, d, <sup>3</sup>*J* 8.5, C13H), 7.15 (1H, ddd, <sup>3</sup>*J* 8.4, 7.1, <sup>4</sup>*J* 1.4, C28H), 6.75 (1H, dd, <sup>3</sup>*J* 8.5, 0.8, C29H), 6.63 (1H, d, <sup>3</sup>*J* 8.4, C9H), 6.33 (1H, ddd, <sup>3</sup>*J* 8.5, 7.2, <sup>4</sup>*J* 1.2, C8H), 6.28 (1H, d, <sup>3</sup>*J* 8.2, C34H), 5.33 (1H, d, <sup>3</sup>*J* 8.3, C33H); <sup>13</sup>C NMR (126 MHz, CDCl<sub>3</sub>):  $\delta$  = 192.5 (C1), 145.6 (C11), 140.4 (C21), 138.6 (C31), 136.5 (C5), 136.5 (C32), 134.2 (C22), 133.9 (C10, C15), 133.7 (C20), 133.5 (C35), 133.2 (C25), 133.1 (C30), 132.4 (C23), 131.7 (C40), 131.2 (C12), 130.3 (C33), 130.1 (C2), 130.0 (C13), 129.8 (C19), 128.4 (C4), 128.3 (C7), 128.2 (C26), 128.0 (C16), 128.0 (C36), 127.9 (C6), 127.7 (C39), 127.7 (C9), 127.6 (C24), 127.4 (C14), 126.9 (C38), 126.7 (C17), 126.6 (C29), 126.5 (C8), 126.4 (C37), 126.4 (C27, C28), 126.0 (C18), 125.3 (C34), 124.5 (C41), 122.2 (C3); <sup>1</sup>H–<sup>1</sup>H NOESY (500 MHz, CDCl<sub>3</sub>) = MALDI-FTICR: *m/z* calcd. for C<sub>41</sub>H<sub>25</sub>BrO<sup>+</sup> 612.1083 found 612.1084 [*M*<sup>+</sup>]. Examination of catalysts and conditions can be found on page S18-S21. No unexpected or unusually high safety hazards were encountered.

**(*Z*,*R*,*S<sub>a</sub>*,*S<sub>a</sub>*,*S<sub>a</sub>*)-4-(1'''-Bromo-[1:2']-quaternaphthalen-2-yl(hydroxy)methyl)phenyl)but-3-en-1-ol (diol **D**)**

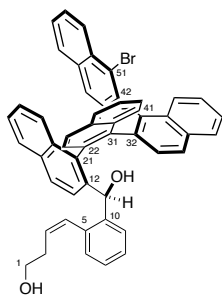

Prepared according to the general procedure **A** using (*S<sub>a</sub>*,*S<sub>a</sub>*,*S<sub>a</sub>*)-**14** (884 mg, 1.44 mmol, 1.00 eq.), (*Z*)-4-(2-bromophenyl)but-3-en-1-ol (**1**, 60 mmolL<sup>-1</sup>, 491 mg, 2.16 mmol, 1.50 eq.), *n*-Bu<sub>2</sub>Mg (0.55 molL<sup>-1</sup>, 2.04 mL, 1.12 mmol, 0.78 eq.) and *n*-BuLi (1.55 molL<sup>-1</sup>, 1.45 mL, 2.25 mmol, 1.56 eq.) to yield after purification by column chromatography (CH<sub>2</sub>Cl<sub>2</sub>:Et<sub>2</sub>O 100:1 to 10:1) a colorless solid (886 mg, 1.16 mmol, 81%); m.p. 209.3 °C (decomp.); *R<sub>f</sub>* 0.14 (CH<sub>2</sub>Cl<sub>2</sub>:Et<sub>2</sub>O 50:1); [ $\alpha$ ]<sub>D</sub> -268 (*c* 1.0 in CDCl<sub>3</sub>);  $\nu_{\text{max}}$  (neat): 3568w, 3054w, 2954w, 1598w, 1503m, 1315m, 1169w, 1034m, 950m, 819s, 745s; <sup>1</sup>H NMR (500 MHz, C<sub>6</sub>D<sub>6</sub>):  $\delta$  = 8.12 (1H, d, <sup>3</sup>*J* 8.5, C29H), 8.02 (1H, dd, <sup>3</sup>*J* 8.1, <sup>4</sup>*J* 1.4, C49H), 7.93 (1H, d, <sup>3</sup>*J* 8.5, C33H), 7.86 (1H, d, <sup>3</sup>*J* 8.5, C34H), 7.72 (1H, d, <sup>3</sup>*J* 8.5, C13H), 7.67–7.62, (3H, m, C9H, C26H, C36H), 7.54 (1H, d, <sup>3</sup>*J* 8.7, C14H), 7.48 (1H, d, <sup>3</sup>*J* 8.1, C16H), 7.38 (1H, d, <sup>3</sup>*J* 8.5, C24H), 7.32 (1H, ddd, <sup>3</sup>*J* 8.0, 6.9, <sup>4</sup>*J* 1.3, C27H), 7.27 (1H, ddd, <sup>3</sup>*J* 8.5, 6.9, <sup>4</sup>*J* 1.5, C28H), 7.18–7.01 (5H, m, C8H, C37H, C46H, C47H, C48H), 7.01–6.97 (2H, m, C6H, C7H), 6.96–6.88 (4H, m, C17H, C23H, C38H, C39H), 6.49 (1H, d, <sup>3</sup>*J* 8.7, C19H), 6.28 (1H, s, C11H), 6.21 (1H, d, <sup>3</sup>*J* 8.3, C44H), 6.07–6.00 (2H, m, C4H, C18H), 5.66 (1H, d, <sup>3</sup>*J* 8.4, C43H), 5.27 (1H, ddd, <sup>3</sup>*J* 11.3, 8.2, 6.7, C3H), 3.00–2.88 (2H, m, C1H), 2.00–1.91 (1H, m, C2H), 1.83 (1H, m, OH), 1.73–1.65 (1H, m, C2H), 0.56 (1H, s, OH);

$^{13}\text{C}$  NMR (126 MHz,  $\text{C}_6\text{D}_6$ ):  $\delta$  = 142.5 (C10), 140.0 (C41), 138.5 (C12), 138.3 (C31), 136.9 (C42), 136.6 (C21), 136.5 (C5), 135.6 (C32), 135.0 (C22), 134.7 (C20), 134.5 (C30), 134.0 (C45), 134.0 (C25), 133.7 (C40), 133.7 (C15), 133.3 (C33, C35), 132.2 (C23), 132.1 (C50), 131.3 (C4), 130.8 (C43), 130.1 (C29), 129.9 (C3), 129.6 (C6), 128.3 (C14, HMQC), 128.2 (C36, HMQC), 128.2 (C26, HMQC), 128.1 (C46, HMQC), 128.1 (C49, HMQC), 127.7 (C34), 127.6 (C16), 127.6 (C9), 127.5 (C24), 127.3 (C8), 127.2 (C39), 127.1 (C19), 127.0 (C7), 127.0 (C38), 126.9 (C48), 126.8 (C37), 126.3 (C47), 126.2 (C27), 126.0 (C13), 125.8 (C44), 125.8 (C28), 125.6 (C18), 125.4 (C17), 124.5 (C51), 70.3 (C11), 61.8 (C1), 31.7 (C2); ESI-MS:  $m/z$  calcd. for  $\text{C}_{51}\text{H}_{37}\text{OBrNaO}_2^+$  783.1869 found 783.1880  $[\text{M}+\text{Na}^+]$ . Decomposes in chloroform and dichloromethane within hours at RT. No unexpected or unusually high safety hazards were encountered.

**$(R_a, S_a, S_a, S_a)$ -1''''-Bromo-[1:2']-quinquenaphthalene-2-carbaldehyde,  $(R_a, S_a, S_a, S_a)$ -15**

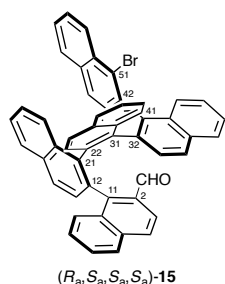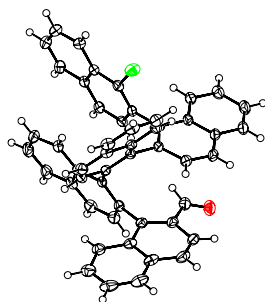

The in situ double-oxidation was performed according to the general procedure **B** using diol **D** (57.7 mg, 75.7  $\mu\text{mol}$ , 1.00 eq.), IBX (212 mg, 75.7  $\mu\text{mol}$ , 10.0 eq.) and 6 h reaction time. Aq. KOH (1.0  $\text{mol L}^{-1}$ , 2.0 mL) was added to the keto-aldehyde solution at RT. The mixture was stirred for 16 h at RT, aq. sat.  $\text{NH}_4\text{Cl}$  (5.0 mL) and  $\text{H}_2\text{O}$  (5.0 mL) were added, the layers were separated and the aq. layer was extracted with  $\text{CH}_2\text{Cl}_2$  (2x 10 mL). The combined organic layers were dried over  $\text{Na}_2\text{SO}_4$ , filtered and concentrated *in vacuo*. Purification by column chromatography (*n*-pentane: $\text{CH}_2\text{Cl}_2$  4:1 to 1:4) gave the aldol condensation product  $(R_a, S_a, S_a, S_a)$ -15 as colorless solid (21.6 mg, 29.2  $\mu\text{mol}$ , 39% over two steps, d.r. = 97:3). Diastereomerically pure material was obtained by precipitation from  $\text{CH}_2\text{Cl}_2$  with *n*-pentane: m.p. 213.1  $^\circ\text{C}$  (decomp.);  $R_f$  0.33 (*n*-pentane: $\text{CH}_2\text{Cl}_2$  1:1);  $[\alpha]_D^{25}$   $-363$  ( $c$  1.0 in  $\text{CDCl}_3$ );  $\nu_{\text{max}}$  (neat): 3051w, 2943w, 2852w, 2361w, 1691s, 1595w, 1503w, 1378w, 1231m, 1150w, 1034w, 951w, 865m, 819s, 745s;  $^1\text{H}$  NMR (500 MHz,  $\text{CDCl}_3$ ):  $\delta$  = 8.86 (1H, d,  $^4J$  0.6, C1H), 7.99–7.95 (1H, m, C49H), 7.92–7.88 (2H, m, C16H, C36H), 7.88–7.85 (2H, m, C3 H, C14H), 7.81 (1H, d,  $^3J$  8.7, C4H), 7.69–7.65 (2H, m, C26H, C46H), 7.61 (1H, d,  $^3J$  8.3, C34H), 7.57 (1H, d,  $^3J$  8.5, C24H) 7.48 (1H, ddd,  $^3J$  8.0, 6.8,  $^4J$  1.1, C37H), 7.45–7.40 (5H, C6H, C9H, C29H, C47H, C48H), 7.38 (1H, d,  $^3J$  8.6, C23H), 7.37–7.31 (2H, m, C7H, C27H), 7.24 (1H, ddd,  $^3J$  8.1, 7.0,  $^4J$  1.1, C17H), 7.19–7.12 (4H, m, C8H, C13H, C28H, C38H), 6.70 (1H, d,  $^3J$  8.6, C39H), 6.40–6.36 (2H, m, C19H, C44H), 6.08 (1H, ddd,  $^3J$  8.4, 6.9,  $^4J$  1.4, C18H), 6.03 (1H, d,  $^3J$  8.5, C33H), 5.70 (1H, d,  $^3J$  8.2, C43H);  $^{13}\text{C}$  NMR (126 MHz,  $\text{CDCl}_3$ ):  $\delta$  = 190.9 (C1), 145.6 (C11), 139.5 (C21), 138.6 (C41), 138.4 (C31), 136.5 (C42), 135.5 (C5), 135.1 (C20), 134.7 (C32), 134.1 (C22), 133.8 (C30), 133.8 (C45), 133.5 (C15), 133.4 (C33), 133.3 (C35), 133.1 (C25), 133.0 (C2), 132.6 (C40), 132.5 (C23), 132.0 (C12), 131.7 (C50), 130.8 (C13), 130.8 (C10), 130.7 (C43), 129.5 (C29), 128.5 (C9), 128.4 (C4), 128.3 (C7), 128.1 (C46), 128.1 (C6), 128.0 (C36), 127.7 (C49), 127.7 (C14), 127.6 (C16), 127.6 (C26), 127.1 (C19), 126.9 (C48), 126.8 (C34), 126.5 (C37, C18), 126.5 (C24), 126.4 (C39), 126.3 (C38), 126.3 (C47), 126.1 (C17), 126.0 (C8), 125.9 (C27), 125.4 (C44), 125.0 (C28), 124.5 (C51), 123.0 (C3); MALDI-FTICR:  $m/z$  calcd. for  $\text{C}_{51}\text{H}_{31}\text{BrO}^{+}$  738.1558 found 738.1550  $[\text{M}^+]$ ; Crystals suitable for X-ray crystallographic analysis were obtained by slow evaporation of a chloroform solution. Examination of catalysts and conditions can be found on page S21–S22. No unexpected or unusually high safety hazards were encountered.

**(S<sub>a</sub>,S<sub>a</sub>,S<sub>a</sub>,S<sub>a</sub>)-1'''-Bromo-[1:2']-quinquenaphthalene-2-carbaldehyde, (S<sub>a</sub>,S<sub>a</sub>,S<sub>a</sub>,S<sub>a</sub>)-16**

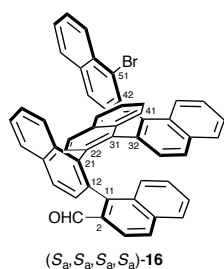

The in situ double-oxidation was performed according to the general procedure **B** using diol **D** (56.1 mg, 73.6  $\mu$ mol, 1.00 eq.), IBX (206 mg, 736  $\mu$ mol, 10.0 eq.) and 6 h reaction time. To the keto-aldehyde at RT was added *N*-(9-anthracenylmethyl)cinchonindinium chloride (3.84 mg, 7.36  $\mu$ mol, 10.0 mol%) followed by NaH (60% in mineral oil, 17.7 mg, 443  $\mu$ mol, 6.01 eq.). The mixture was stirred for 16 h at RT, aq. sat. NH<sub>4</sub>Cl (5.0 mL) and H<sub>2</sub>O (5.0 mL) were added, the layers were separated and the aq. layer was extracted with CH<sub>2</sub>Cl<sub>2</sub> (2x 10 mL). The combined organic layers were dried over Na<sub>2</sub>SO<sub>4</sub>, filtered and concentrated *in vacuo*. Purification by column chromatography (*n*-pentane:CH<sub>2</sub>Cl<sub>2</sub> 4:1 to 1:4) yielded the aldol condensation product as colorless solid (22.2 mg, 30.0  $\mu$ mol, 41% over two steps, d.r. = 77:23). Diastereomerically pure material was obtained by preparative TLC (*n*-pentane:CH<sub>2</sub>Cl<sub>2</sub> 1:2): m.p. 251.4 °C (decomp.); °C; *R<sub>f</sub>* 0.26 (*n*-pentane:CH<sub>2</sub>Cl<sub>2</sub> 1:1); [ $\alpha$ ]<sub>D</sub> -478 (*c* 1.0 in CDCl<sub>3</sub>);  $\nu_{\text{max}}$  (neat): 3052w, 2852w, 1725m, 1693m, 1678s, 1596w, 1503w, 1425w, 1309m, 1267m, 1235m, 1101m, 1033w, 822s, 742s; <sup>1</sup>H NMR (500 MHz, CDCl<sub>3</sub>):  $\delta$  = 9.69 (1H, d, <sup>4</sup>*J* 0.8, C1H), 7.98–7.94 (1H, m, C49H), 7.91–7.87 (2H, m, C14H, C16H), 7.84 (1H, d, <sup>3</sup>*J* 8.2, C6H), 7.83–7.79 (2H, m, C26H, C4H), 7.76 (1H, d, <sup>3</sup>*J* 8.3, C24H), 7.72 (1H, d, <sup>3</sup>*J* 8.6, C3H), 7.44–7.37 (6H, m, C27H, C29H, C36H, C46H, C47H, C48H), 7.34–7.28 (3H, m, C7H, C13H, C37H), 7.27–7.21 (2H, m, C17H, C23H), 7.16 (1H, ddd, <sup>3</sup>*J* 8.5, 6.8, <sup>4</sup>*J* 1.4, C28H), 7.08 (1H, ddd, <sup>3</sup>*J* 8.4, 6.7, <sup>4</sup>*J* 1.4, C38H), 6.92 (1H, d, <sup>3</sup>*J* 8.5, C9H), 6.69 (1H, dd, <sup>3</sup>*J* 8.5, <sup>4</sup>*J* 0.7, C39H), 6.44 (1H, d, <sup>3</sup>*J* 8.5, C34H), 6.40 (1H, dd, <sup>3</sup>*J* 8.4, <sup>4</sup>*J* 0.6, C44H), 6.33 (1H, d, <sup>3</sup>*J* 8.6, C19H), 6.26 (1H, ddd, <sup>3</sup>*J* 8.3, 6.8, <sup>4</sup>*J* 1.3, C8H), 6.09 (1H, ddd, <sup>3</sup>*J* 8.4, 6.9, <sup>4</sup>*J* 1.3, C18H), 5.93 (1H, d, <sup>3</sup>*J* 8.3, C43H), 5.60 (1H, d, <sup>3</sup>*J* 8.6, C33H); <sup>13</sup>C NMR (126 MHz, CDCl<sub>3</sub>):  $\delta$  = 192.3 (C1), 145.2 (C11), 141.1 (C21), 138.2 (C31), 137.6 (C41), 136.7 (C5), 136.7 (C42), 135.3 (C20), 134.1 (C32), 133.9 (C30), 133.7 (C45), 133.6 (C15), 133.5 (C25), 133.4 (C10), 133.3 (C22), 133.0 (C35), 132.4 (C40), 132.2 (C23), 131.8 (C50), 131.5 (C33), 131.3 (C12), 130.5 (C43), 130.0 (C2), 129.8 (C13), 129.6 (C29), 128.3 (C4), 128.1 (C7), 128.1 (C46), 128.0 (C6, C26), 127.8 (C49), 127.7 (C36), 127.5 (C14), 127.5 (C19), 127.2 (C24), 127.2 (C16), 126.9 (C9), 126.9 (C48), 126.5 (C8), 126.4 (C18), 126.3 (C47), 126.2 (C17, C39), 126.0 (C27), 125.7 (C34), 125.6 (C37), 125.6 (C38), 125.3 (C44), 125.1 (C28), 124.8 (C51), 122.2 (C3); MALDI-FTICR: *m/z* calcd. for C<sub>51</sub>H<sub>31</sub>BrO<sup>+</sup> 738.1558 found 738.1545 [M<sup>+</sup>]. Examination of catalysts and conditions can be found on page S21-S22. No unexpected or unusually high safety hazards were encountered.

## Catalyst-controlled Stereodivergent Synthesis, Triaryl Amine End-Group

### (Z)-4-(2-((4-(Bis(4-methoxyphenyl)amino)phenyl)(hydroxy)methyl)phenyl)but-3-en-1-ol (diol E)

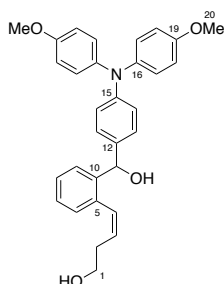

Prepared according to the general procedure **A** using 4-(bis(4-methoxyphenyl)amino)benzaldehyde (2.00 g, 6.00 mmol, 1.00 eq.), (Z)-4-(2-bromophenyl)but-3-en-1-ol (370 mmol<sup>-1</sup>, 2.04 g, 9.00 mmol, 1.50 eq.), *n*-Bu<sub>2</sub>Mg (0.55 molL<sup>-1</sup>, 8.51 mL, 4.68 mmol, 0.78 eq.) and *n*-BuLi (1.51 molL<sup>-1</sup>, 6.20 mL, 9.36 mmol, 1.56 eq.), to yield after column chromatography (*n*-pentane:Et<sub>2</sub>O 1:1 to 0:1) the desired diol as a pale yellow solid (2.23 g, 4.62 mmol, 77%); m.p. 51.3-55.0 °C; *R*<sub>f</sub> 0.51 (*n*-pentane:Et<sub>2</sub>O 1:3); *v*<sub>max</sub> (neat): 3352w, 3001w, 2356w, 2055w, 1605w, 1501s, 1236s, 1175w, 1106w, 1031m, 826m 762w; <sup>1</sup>H NMR (500 MHz, C<sub>6</sub>D<sub>6</sub>): δ = 7.66 (1H, d, <sup>3</sup>*J* 7.7, C9H), 7.24 (2H, d, <sup>3</sup>*J* 8.4, C13H), 7.13 (1H, d, <sup>3</sup>*J* 7.0, C6H), 7.11–7.05 (8H, m, C7H, C8H, C14H, C17H), 6.72 (4H, d, <sup>3</sup>*J* 8.6, C18H), 6.62 (1H, d, <sup>3</sup>*J* 11.5, C4H), 5.91 (1H, s, C11H), 5.52 (1H, ddd, <sup>3</sup>*J* 11.3, 7.5, 7.5, C3H), 3.30 (6H, s, C20H), 3.19 (2H, dd, <sup>3</sup>*J* 6.4, 6.2, C1H), 2.17–2.08 (6H, m, C2H), 2.05–1.96 (1H, m, C2H); <sup>13</sup>C NMR (126 MHz, C<sub>6</sub>D<sub>6</sub>): δ = 156.4 (C19), 148.5 (C15), 143.1 (C10), 141.7 (C16), 136.3 (C12), 136.0 (C5), 130.6 (C4), 130.4 (C3), 129.9 (C6), 128.3 (C13), 127.6 (C7/C8), 127.3 (C9), 127.1 (C7/C8), 126.9 (C17), 121.1 (C14), 115.2 (C18), 73.0 (C11), 62.0 (C1), 55.0 (C20), 32.0 (C2); ESI-MS: *m/z* calcd. for C<sub>21</sub>H<sub>21</sub>NO<sub>4</sub>Na<sup>+</sup> 504.2145 found 504.2146 [M+Na<sup>+</sup>]. No unexpected or unusually high safety hazards were encountered.

### 1-(4-(Bis(4-methoxyphenyl)amino)phenyl)-2-naphthaldehyde

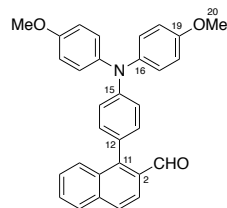

The in situ double-oxidation was performed according to the general procedure **B** using diol **E** (1.30 g, 2.70 mmol, 1.00 eq.) and IBX (2.27 g, 8.10 mmol, 3.00 eq.) with 3 h reaction time. To the keto-aldehyde solution *rac*-(±)-5-(2-pyrrolidinyl)-1*H*-tetrazole (150 mg, 1.08 mmol, 40 mol%) in DMF (43 mL) and H<sub>2</sub>O (135 mL) was added and the mixture was vigorously stirred at RT for 17 h. The layers were separated and the aq. layer was extracted with CH<sub>2</sub>Cl<sub>2</sub> (150 mL). The combined organic layers were concentrated *in vacuo*, the residue dissolved in Et<sub>2</sub>O (150 mL). The resulting solution was washed with H<sub>2</sub>O (4x 150 mL) to remove the remaining DMF. The organic layer was dried over Na<sub>2</sub>SO<sub>4</sub>, filtered and concentrated *in vacuo*. The crude aldol addition product was dissolved in CHCl<sub>3</sub> (135 mL) and Amberlite® IRA-96 (6.30 g, washed with 2x MeOH and 2x CH<sub>2</sub>Cl<sub>2</sub>) was added. The mixture was stirred for 2 h at RT, filtered, and concentrated *in vacuo* to give the crude aldehyde. Purification by column chromatography (*n*-pentane:Et<sub>2</sub>O 1:1) yielded 1-(4-(bis(4-methoxyphenyl)amino)phenyl)-2-naphthaldehyde as a yellow solid (890 mg, 1.94 mmol, 72% over two steps); m.p. 72.8 °C (decomp.); *R*<sub>f</sub> 0.76 (*n*-pentane:Et<sub>2</sub>O 2:1); *v*<sub>max</sub> (neat): 2835w, 1685m, 1602m, 1501s, 1461m, 1382w, 1284m, 1236s, 1179m, 1107w, 1032m, 908w, 821s, 749m; <sup>1</sup>H NMR (500 MHz, CDCl<sub>3</sub>): δ = 10.01 (1H, d, <sup>3</sup>*J* 0.7, C1H), 8.04 (1H, d, <sup>3</sup>*J* 8.6, C3H), 7.92–7.88 (2H, m, C6H, C9H), 7.87 (1H, d, <sup>3</sup>*J* 8.4, C4H), 7.62 (1H, ddd, <sup>3</sup>*J* 8.2, 6.9, <sup>4</sup>*J* 1.3, C7H), 7.50 (1H, ddd, <sup>3</sup>*J* 8.3, 7.1, <sup>4</sup>*J* 1.4, C8H), 7.20–7.16 (6H, m, C13H, C17H), 7.06–7.02 (2H, m, C14H), 6.92–6.88 (4H, m, C18H), 3.82 (6H, s, C20H). <sup>13</sup>C NMR (126 MHz, CDCl<sub>3</sub>): δ = 193.4 (C1), 156.4 (C19), 149.1 (C15), 147.1 (C11), 140.6 (C16), 136.3 (C5), 132.9 (C10), 132.0 (C13), 131.6 (C2), 128.8 (C7), 128.4 (C6), 128.1 (C4), 128.0 (C9), 127.3 (C17), 126.8 (C8), 126.0 (C12), 122.4 (C3), 119.0 (C14), 115.0 (C18), 55.6 (C20); ESI-MS: *m/z* calcd. for C<sub>31</sub>H<sub>25</sub>NO<sub>3</sub><sup>+</sup> 459.1829 found 459.1827 [M<sup>+</sup>]. No unexpected or unusually high safety hazards were encountered.

**(Z)-4-(2-((1-(4-(bis(4-methoxyphenyl)amino)phenyl)naphthalen-2-yl)(hydroxy)methyl)phenyl)but-3-en-1-ol (diol F)**

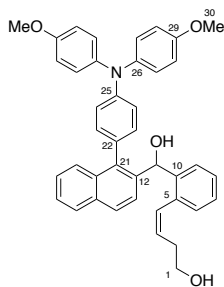

Prepared according to the general procedure **A** using 1-(4-(bis(4-methoxyphenyl)amino)phenyl)-2-naphthaldehyde (846 mg, 1.84 mmol, 1.00 eq.), (Z)-4-(2-bromophenyl)but-3-en-1-ol (370 mmolL<sup>-1</sup>, 627 mg, 2.76 mmol, 1.50 eq.), *n*-Bu<sub>2</sub>Mg (0.55 molL<sup>-1</sup>, 627 mg, 2.76 mmol, 0.78 eq.) and *n*-BuLi (1.51 molL<sup>-1</sup>, 1.91 mL, 2.87 mmol, 1.56 eq.), to yield after column chromatography (*n*-pentane:Et<sub>2</sub>O 1:1 to 0:1) the desired diol as a pale yellow solid (846 mg, 1.39 mmol, 76%): m.p. 87.4–90.7 °C; *R*<sub>f</sub> 0.70 (*n*-pentane:Et<sub>2</sub>O 1:3); *v*<sub>max</sub> (neat): 3349w, 2949w, 2358w, 1604w, 1501s, 1462w, 1385w, 1236s, 1177w, 1106w, 823m, 756w; <sup>1</sup>H NMR (500 MHz, C<sub>6</sub>D<sub>6</sub>): δ = 8.19 (1H, d, <sup>3</sup>*J* 8.6, C13*H*), 7.81–7.77 (2H, m, C14*H*, C19*H*), 7.71 (1H, dd, <sup>3</sup>*J* 8.0, <sup>4</sup>*J* 1.0, C16*H*), 7.48–7.44 (1H, m, C9*H*), 7.26 (1H, ddd, <sup>3</sup>*J* 8.1, 6.8, <sup>4</sup>*J* 1.3, C17*H*), 7.23–7.19 (5H, m, C18*H*, C27*H*), 7.16 (1H, dd, <sup>3</sup>*J* 8.3, <sup>4</sup>*J* 2.5, C24*H*/C24'*H*), 7.09 (1H, dd, <sup>3</sup>*J* 8.4, <sup>4</sup>*J* 2.1, C23*H*/C23'*H*), 7.06–7.01 (3H, m, C6*H*, C7*H*, C8*H*), 6.93 (1H, dd, <sup>3</sup>*J* 8.4, <sup>4</sup>*J* 2.4, C24*H*, C24'*H*), 6.81–6.77 (4H, m, C28*H*), 6.61 (1H, dd, <sup>3</sup>*J* 8.4, <sup>4</sup>*J* 2.0, C23*H*/C23'*H*), 6.30 (1H, d, <sup>3</sup>*J* 11.5, C4*H*), 6.28 (1H, s, C11*H*), 5.54–5.47 (1H, m, C3*H*), 3.98 (1H, s, OH), 3.33 (6H, s, C30*H*), 3.21–3.10 (2H, m, C1*H*), 2.29–2.19 (1H, m, C2*H*), 2.00 (1H, s, OH), 1.83–1.74 (1H, m, C2*H*); <sup>13</sup>C NMR (126 MHz, C<sub>6</sub>D<sub>6</sub>): δ = 156.6 (C29), 148.4 (C25), 143.6 (C10), 141.6 (C26), 139.4 (C12), 138.2 (C21), 137.0 (C5), 134.0 (C20), 133.6 (C15), 132.0 (C23), 131.2 (C4), 131.0 (C23'), 130.9 (C3), 129.6 (C6/C7/C8), 128.6 (C22), 128.4 (C9), 128.3 (C16), 127.8 (C6/C7/C8), 127.5 (C14), 127.2 (C19), 127.2 (C6/C7/C8), 127.0 (C27), 126.1 (C18), 125.8 (C17), 125.3 (C13), 121.0 (C24'), 120.7 (C24), 115.3 (C28), 70.7 (C11), 61.6 (C1), 55.1 (C30), 31.6 (C2); ESI-MS: *m/z* calcd. for C<sub>41</sub>H<sub>37</sub>NO<sub>4</sub>Na<sup>+</sup> 630.2615 found 630.2614 [M+Na<sup>+</sup>]. No unexpected or unusually high safety hazards were encountered.

**(S<sub>a</sub>)-1'-(4-(bis(4-methoxyphenyl)amino)phenyl)-[1,2'-binaphthalene]-2-carbaldehyde, (S<sub>a</sub>)-18**

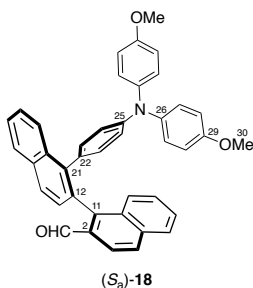

The in situ double-oxidation was performed according to the general procedure **B** using diol **F** (835 mg, 1.37 mmol, 1.00 eq.) and IBX (1.15 g, 4.11 mmol, 3.00 eq.) with 3 h reaction time. To the keto-aldehyde solution (*S*)-(–)-5-(2-pyrrolidinyl)-1*H*-tetrazole (76.3 mg, 548 μmol, 40 mol%) in DMF (22 mL) and citrate buffer (pH 5, 68 mL) was added and the mixture was vigorously stirred at RT for 60 h. The layers were separated and the aq. layer was extracted with CH<sub>2</sub>Cl<sub>2</sub> (2x 150 mL). The combined organic layers were concentrated *in vacuo* and the residue was redissolved in Et<sub>2</sub>O (150 mL). The resulting solution was washed with H<sub>2</sub>O (4x 150 mL) to remove the remaining DMF. The organic phases were dried over Na<sub>2</sub>SO<sub>4</sub>, filtered and the solvent was removed *in vacuo*. The crude aldol addition product was dissolved in CHCl<sub>3</sub> (135 mL) and Amberlite® IRA-96 (8.35 g, washed with 2x MeOH and 2x CH<sub>2</sub>Cl<sub>2</sub>) was added. The mixture was stirred for 6 h at RT, filtered, and concentrated *in vacuo* to give the crude aldehyde. Purification by column chromatography (*n*-pentane:Et<sub>2</sub>O 1:1) yielded (*S<sub>a</sub>*)-**17** as a yellow solid (516 mg, 881 μmol, 64%): m.p. 102.8–105.8 °C; *R*<sub>f</sub> 0.62 (*n*-pentane:Et<sub>2</sub>O 2:1); [α]<sub>D</sub> –279 (*c* 0.5 in CHCl<sub>3</sub>); *v*<sub>max</sub> (neat): 2952w, 2836w, 1692m, 1606w, 1504s, 1241s, 1037w, 826m, 754m; <sup>1</sup>H NMR (500 MHz, CDCl<sub>3</sub>): δ = 9.87 (1H, d, <sup>4</sup>*J* 0.8, C1*H*), 8.01 (1H, d, <sup>3</sup>*J* 8.2, C16*H*), 7.99 (1H, d, <sup>3</sup>*J* 8.3, C14*H*), 7.92 (1H, d, <sup>3</sup>*J* 8.5, C3*H*), 7.89–7.85 (2H, m, C6*H*, C19*H*), 7.83 (1H, d, <sup>3</sup>*J* 8.6, C4*H*), 7.64–7.58 (2H, m, C9*H*, C17*H*), 7.56 (1H ddd, <sup>3</sup>*J* 8.2, 6.9, <sup>4</sup>*J* 1.3, C7*H*), 7.54–7.50 (2H, m, C13*H*, C18*H*), 7.39 (1H, ddd, <sup>3</sup>*J* 8.3, 7.0, <sup>4</sup>*J* 1.4, C8*H*), 6.94 (1H, dd, <sup>3</sup>*J* 8.5, <sup>4</sup>*J* 2.1, C23*H*), 6.87–6.83 (4H, m, C27*H*), 6.78–6.72 (5H, m, C24*H*, C28*H*), 6.55 (1H, dd, <sup>3</sup>*J* 8.6, <sup>4</sup>*J* 2.3, C23'*H*), 6.42 (1H, dd, <sup>3</sup>*J* 8.4, <sup>4</sup>*J* 2.4, C24'*H*), 3.77 (6H, s, C30*H*); <sup>13</sup>C NMR (126 MHz, C<sub>6</sub>D<sub>6</sub>): δ = 192.5 (C1), 155.8 (C29), 147.6 (C25), 146.7 (C11), 140.9 (C26), 140.7 (C21), 136.0 (C5), 133.8 (C15), 133.1 (C10), 132.8 (C20), 132.0 (C12), 131.0 (C23), 130.9 (C2), 130.3 (C23'), 130.1 (C22), 128.7 (C13), 128.7 (C7), 128.3 (C16), 128.3 (C6), 128.2 (C9), 128.1 (C4), 127.2 (C14), 127.1 (C19), 126.9 (C18), 126.8 (C8), 126.6 (C17), 126.4 (C27), 121.9 (C3), 120.1 (C24'), 120.0 (C24), 114.7 (C28), 55.6 (C30); ESI-

MS:  $m/z$  calcd. for  $C_{41}H_{31}NO_3^{++}$  585.2298 found 2301  $[M^{++}]$ ; The e.r. (>99:1) of ( $S_a$ )-**17** was determined by HPLC using a *Chiralcel AD-H* column (1.0 mLmin<sup>-1</sup>, *i*-PrOH:*n*-heptane 10:90): ( $S_a$ )  $t_R$  = 10.1 min and ( $R_a$ )  $t_R$  = 11.5 min; racemic reference material was obtained with *rac*-5-(2-pyrroldinyl)-1*H*-tetrazole as catalyst. No unexpected or unusually high safety hazards were encountered.

**( $Z,S_a$ )-4-(2-((1'-(4-(Bis(4-methoxyphenyl)amino)phenyl)-[1,2'-binaphthalen]-2-yl)(hydroxy)methyl)phenyl)but-3-en-1-ol (diol G)**

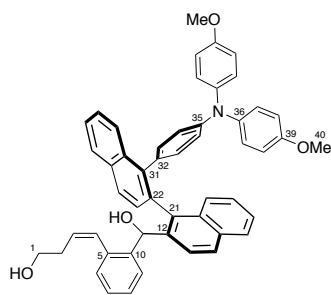

Prepared according to the general procedure **A** using ( $S_a$ )-**18** (464 mg, 792  $\mu$ mol, 1.00 eq.), ( $Z$ )-4-(2-bromophenyl)but-3-en-1-ol (370 mmolL<sup>-1</sup>, 270 mg, 1.19 mmol, 1.50 eq.), *n*-Bu<sub>2</sub>Mg (0.55 molL<sup>-1</sup>, 1.12 mL, 618  $\mu$ mol, 0.78 eq.) and *n*-BuLi (1.51 molL<sup>-1</sup>, 824  $\mu$ L, 1.24 mmol, 1.56 eq.), to yield after column chromatography (*n*-pentane:Et<sub>2</sub>O 1:1 to 0:1) the desired diol as a pale yellow solid (480 mg, 654  $\mu$ mol, 83%); m.p. 111.1–112.9 °C;  $R_f$  0.62 (*c*-hexane:EtOAc 1:1);  $[\alpha]_D$  -165 (*c* 1.0 in CHCl<sub>3</sub>);  $\nu_{max}$  (neat): 3389br, 3054w, 2949w, 1604w, 1502s, 1462m, 1378w, 1318m, 1281m, 1237s, 1177m, 1107w, 1033s, 823s, 750m; <sup>1</sup>H NMR (500 MHz, CDCl<sub>3</sub>):  $\delta$  = 8.18 (1H, d, <sup>3</sup>*J* 8.1, C29H), 8.05 (1H, d, <sup>3</sup>*J* 8.6, C13H), 7.71 (1H, d, <sup>3</sup>*J* 7.9, C26H), 7.67 (1H, d, <sup>3</sup>*J* 8.6, C14H), 7.64–7.59 (2H, m, C9H, C16H), 7.54 (1H, dd, <sup>3</sup>*J* 8.4, <sup>4</sup>*J* 2.2, C33H), 7.50–7.45 (2H, m, C19H, C24H), 7.34–7.27 (2H, m, C27H, C28H), 7.22 (1H, ddd, <sup>3</sup>*J* 8.1, 6.9, <sup>4</sup>*J* 1.3, C17H), 7.13 (1H, ddd, <sup>3</sup>*J* 8.2, 6.9, <sup>4</sup>*J* 1.4, C18H), 7.10–7.03 (3H, m, C7H, C8H, C34H), 7.02–6.98 (2H, m, C6H, C23H), 6.94–6.85 (5H, m, C33'H, C37H), 6.66–6.62 (4H, m, C38H), 6.56 (1H, dd, <sup>3</sup>*J* 8.6, <sup>4</sup>*J* 2.5, C34'H), 6.20 (1H, s, C11H), 5.96 (1H, d, <sup>3</sup>*J* 11.5, C4H), 5.20 (1H, ddd, <sup>3</sup>*J* 11.3, 9.2, <sup>4</sup>*J* 5.8, C3H), 3.28 (6H, s, C40H), 2.99–2.86 (2H, m, C1H), 2.07–1.98 (1H, m, C2H), 1.63–1.54 (1H, m, C2H); <sup>13</sup>C NMR (126 MHz, C<sub>6</sub>D<sub>6</sub>):  $\delta$  = 156.5 (C39), 148.4 (C35), 143.0 (C10), 141.2 (C36), 139.1 (C31), 139.0 (C12), 137.3 (C21), 137.0 (C5), 135.5 (C22), 134.0 (C20), 134.0 (C25), 133.6 (C30), 133.3 (C15), 131.6 (C33), 131.4 (C33'), 130.9 (C4), 130.5 (C32), 130.4 (C3), 130.1 (C23), 129.6 (C6), 128.5 (C26), 128.4 (C16), 128.3 (C9), 128.1 (C14), 127.5 (C29), 127.4 (C19), 127.4 (C8), 127.1 (C7), 127.1 (C24), 127.0 (C37), 126.5 (C28), 126.2 (C18), 126.2 (C27), 125.7 (C17), 125.6 (C13), 120.2 (C34'), 119.8 (C34), 115.1 (C38), 70.7 (C11), 61.7 (C1), 55.0 (C40), 31.5 (C2); ESI-MS:  $m/z$  calcd. for  $C_{51}H_{43}NO_4Na^+$  756.3084 found 756.3075. No unexpected or unusually high safety hazards were encountered.

**( $Z,R_a,S_a$ )-1''-(4-(Bis(4-methoxyphenyl)amino)phenyl)-[1:2']-ternaphthalene-2-carbaldehyde, ( $R_a,S_a$ )-**19****

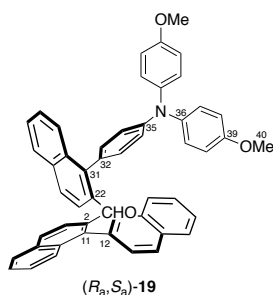

The in situ double-oxidation was performed according to the general procedure **B** using diol **G** (50.0 mg, 68.1  $\mu$ mol, 1.00 eq.), IBX (57.2 mg, 204  $\mu$ mol, 3.00 eq.) and 2 h reaction time. To the keto-aldehyde solution aq. KOH (1.0 molL<sup>-1</sup>, 3.4 mL) was added. The mixture was stirred for 2 h at RT, aq. sat. NH<sub>4</sub>Cl (5.0 mL) and H<sub>2</sub>O (5.0 mL) were added, the layers were separated and the aq. layer was extracted with CH<sub>2</sub>Cl<sub>2</sub> (2x 10 mL). The combined organic layers were dried over Na<sub>2</sub>SO<sub>4</sub>, filtered and concentrated *in vacuo*. Purification by column chromatography (*n*-pentane:Et<sub>2</sub>O 5:1) yielded the aldol condensation product as a yellow solid (21.0 mg, 29.0  $\mu$ mol, 43% over two steps, d.r. = 95:5); m.p. 160.2–162.5 °C;  $R_f$  0.44 (*c*-hexane:EtOAc 4:1);  $[\alpha]_D$  -84.7 (*c* 1.0 in CHCl<sub>3</sub>);  $\nu_{max}$  (neat): 3054w, 2952w, 2835w, 1688m, 1603m, 1503s, 1374w, 1286m, 1239s, 1179w, 1107w, 1035m, 909m, 823s, 731s, 647w; <sup>1</sup>H NMR (500 MHz, CDCl<sub>3</sub>, line-broadening due to triaryl amine rotation):  $\delta$  = 8.57 (1H, d, <sup>4</sup>*J* 0.7, C1H), 8.00 (1H, d, <sup>3</sup>*J* 8.3, C16H), 7.93 (1H, d, <sup>3</sup>*J* 8.5, C14H), 7.78 (1H, d, <sup>3</sup>*J* 8.6, C3H), 7.70–7.60 (5H, m, C4H, C6H, C9H, C26H, C29H), 7.58 (1H, ddd, <sup>3</sup>*J* 8.1, 6.8, <sup>4</sup>*J* 1.2, C17H), 7.55–7.52 (2H, m, C19H, C24H), 7.49 (1H, d, <sup>3</sup>*J* 8.5, C23H), 7.45 (1H, ddd, <sup>3</sup>*J* 8.3, 6.8, <sup>4</sup>*J* 1.4, C18H), 7.40 (1H, ddd, <sup>3</sup>*J* 8.1, 6.9, <sup>4</sup>*J* 1.2, C7H), 7.38–7.31 (2H, m, C8H, C27H), 7.29 (1H, d, <sup>3</sup>*J* 8.4, C13H), 7.28–7.24 (1H, m, C28H), 7.24–7.16 (4H, m br, C37H/C38H), 6.89–6.84 (4H, m br, C37H/C38H), 6.79–6.73 (1H, m br, C33H/C34H),

6.54–6.48 (1H, m br, C33H/C34H), 6.40–6.31 (1H, m br, C33H/C34H), 3.80 (6H, s, C40H);  $^{13}\text{C}$  NMR (126 MHz,  $\text{CDCl}_3$ , line-broadening due to triaryl amine rotation):  $\delta$  = 192.5 (C1), 156.3 (C39), 148.1 (C35), 145.1 (C11), 140.7 (C36), 139.6 (C21), 138.8 (C31), 135.4 (C5), 134.7 (C20), 134.0 (C22), 133.3 (C15, C25), 132.9 (C2, C30), 132.6 (C32/C33/C33'), 132.0 (C12), 131.3 (C10), 130.6 (C23), 130.5 (C32/C33/C33'), 130.0 (C13), 128.5 (C9), 128.4 (C16), 128.3 (C4), 128.2 (C7), 128.0 (C6), 127.9 (C26), 127.8 (C32/C33/C33'), 127.5 (C14), 127.4 (C19), 127.1 (C18), 126.9 (C29), 126.5 (C17), 126.0 (C24), 125.9 (C8), 125.8 (C28), 125.8 (C37), 125.7 (C27), 122.0 (C3), 118.2 (C34/C34'), 118.0 (C34/C34'), 114.8 (C38), 55.6 (C40); ESI-MS:  $m/z$  calcd. for  $\text{C}_{51}\text{H}_{37}\text{NO}_3\text{Na}^+$  734.2666 found 734.2669  $[\text{M}+\text{Na}^+]$ . Test-reaction for the aldol condensation were performed with  $\text{KOH}_{(\text{s})}$  in the absence of water and showed the following selectivities:  $\text{CHCl}_3$  85:15, toluene 80:20, THF (>90:10). No unexpected or unusually high safety hazards were encountered.

**(Z, $R_a,S_a$ )-1''-(4-(Bis(4-methoxyphenyl)amino)phenyl)-[1:2']-ternaphthalene-2-carbaldehyde, ( $S_a,S_a$ )-20**

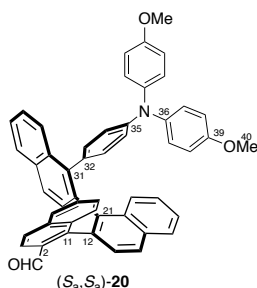

The in situ double-oxidation was performed according to the general procedure **B** using diol **G** (147 mg, 200  $\mu\text{mol}$ , 1.00 eq.), IBX (168 mg, 600  $\mu\text{mol}$ , 3.00 eq.) and 2 h reaction time. To the keto-aldehyde solution *N*-benzylcinchonium chloride (8.42 mg, 20.0  $\mu\text{mol}$ , 10.0 mol%) and aq.  $\text{KOH}$  (1.0  $\text{molL}^{-1}$ , 5.7 mL) were added. The mixture was stirred for 16 h at RT,  $\text{H}_2\text{O}$  (10 mL) was added, the layers were separated and the aq. layer was extracted with  $\text{CH}_2\text{Cl}_2$  (2x 10 mL). The combined organic layers were dried over  $\text{Na}_2\text{SO}_4$ , filtered and concentrated *in vacuo*. Purification by preparative TLC (*n*-pentane: $\text{Et}_2\text{O}$  2:1) yielded a mixture of ( $R_a,S_a$ )-**19** and ( $S_a,S_a$ )-**18** (21.0 mg, 29.0  $\mu\text{mol}$ , 43% over two steps, d.r. = 35:65). Diastereomerically pure material was obtained by preparative TLC (*c*-hexane: $\text{EtOAc}$  4:1):  $R_f$  0.40 (*c*-hexane: $\text{EtOAc}$  4:1);  $[\alpha]_D -272.1$  (*c* 0.2 in  $\text{CHCl}_3$ );  $\nu_{\text{max}}$  (neat): 3054w, 2928w, 2849w, 1678m, 1604m, 1503s, 1462w, 1379w, 1239s, 1180w, 1104w, 1034m, 909m, 824s, 731s;  $^1\text{H}$  NMR (500 MHz,  $\text{CDCl}_3$ ):  $\delta$  = 9.93 (1H, d,  $^4J$  0.9, C1H), 8.01 (1H, dd,  $^3J$  8.5,  $^4J$  1.1, C16H), 7.97 (1H, d,  $^3J$  8.3, C14H), 7.81 (1H, d,  $^3J$  8.1, C26H), 7.79 (1H, d,  $^3J$  8.5, C24H), 7.71–7.67 (2H, m, C3H, C6H), 7.64 (1H, d,  $^3J$  8.8, C4H), 7.61–7.56 (2H, m, C17H, C19H), 7.48–7.43 (2H, m, C13H, C18H), 7.42–7.36 (4H, m, C7H, C23H, C27H, C29H), 7.25–7.21 (2H, m, C8H, C28H), 7.07–7.02 (4H, m, C37H), 6.92 (1H, d,  $^3J$  8.6, C9H), 6.86–6.81 (4H, m, C38H), 6.51 (dd,  $^3J$  8.4,  $^4J$  1.9, C33H), 6.41 (1H, dd,  $^3J$  8.4,  $^4J$  2.4, C34H) 5.80 (1H, dd,  $^3J$  8.4,  $^4J$  2.3, C34'H) 5.44 (1H, dd,  $^3J$  8.4,  $^4J$  1.9, C33'H), 3.80 (6H, s, C40H);  $^{13}\text{C}$  NMR (126 MHz,  $\text{CDCl}_3$ ):  $\delta$  = 192.4 (C1), 156.2 (C39), 147.1 (C35), 145.7 (C11), 141.1 (C21), 140.6 (C36), 138.9 (C31), 136.1 (C5), 134.6 (C20), 133.9 (C22), 133.4 (C25), 133.4 (C15), 133.1 (C30), 132.9 (C10), 131.8 (C33'), 131.7 (C12), 130.5 (C2), 130.2 (C23), 129.9 (C33), 129.4 (C13), 128.6 (C32), 128.3 (C16), 128.2 (C26), 128.1 (C4), 128.1 (C7), 127.9 (C6, C9), 127.8 (C19), 127.3 (C37), 127.0 (C14), 126.9 (C18, C24, C29), 126.7 (C8), 126.6 (C17), 125.9 (C28), 125.8 (C27), 121.9 (C3), 117.5 (C34), 117.4 (C34'), 114.8 (C38), 55.6 (C40); ESI-MS:  $m/z$  calcd. for  $\text{C}_{51}\text{H}_{37}\text{NO}_3\text{Na}^+$  734.2666 found 734.2669  $[\text{M}+\text{Na}^+]$ . No unexpected or unusually high safety hazards were encountered.

# NMR Analysis of the Structures in Solution

— strong nOe signal      - - - - - weak nOe signal  
 ● <sup>1</sup>H signal (in ppm), ring current effect

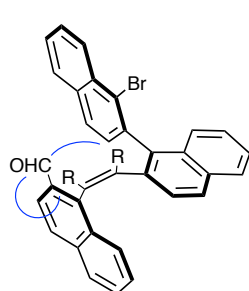

(*R<sub>a</sub>*, *S<sub>a</sub>*, *S<sub>a</sub>*)-13

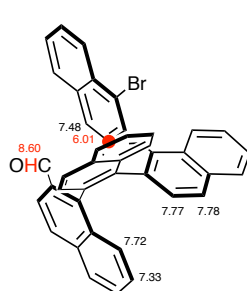

(*R<sub>a</sub>*, *S<sub>a</sub>*, *S<sub>a</sub>*)-13

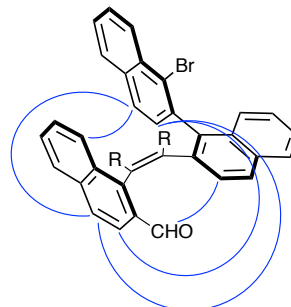

(*S<sub>a</sub>*, *S<sub>a</sub>*, *S<sub>a</sub>*)-14

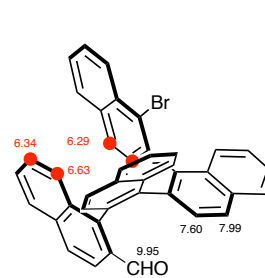

(*S<sub>a</sub>*, *S<sub>a</sub>*, *S<sub>a</sub>*)-14

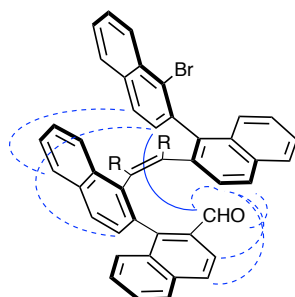

(*R<sub>a</sub>*, *S<sub>a</sub>*, *S<sub>a</sub>*, *S<sub>a</sub>*)-15

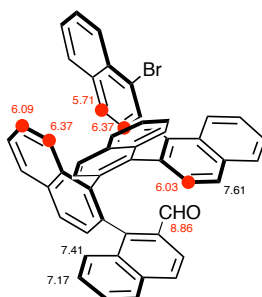

(*R<sub>a</sub>*, *S<sub>a</sub>*, *S<sub>a</sub>*, *S<sub>a</sub>*)-15

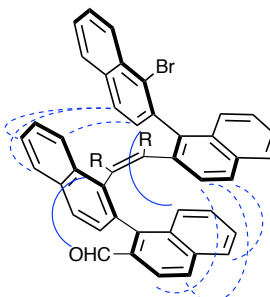

(*S<sub>a</sub>*, *S<sub>a</sub>*, *S<sub>a</sub>*, *S<sub>a</sub>*)-16

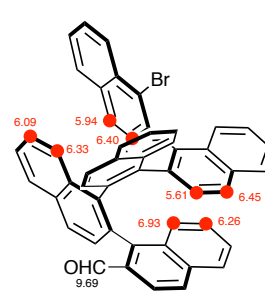

(*S<sub>a</sub>*, *S<sub>a</sub>*, *S<sub>a</sub>*, *S<sub>a</sub>*)-16

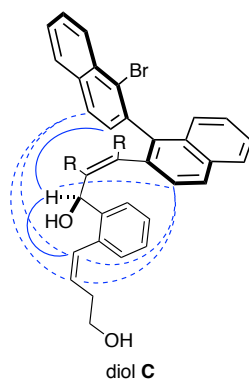

diol C

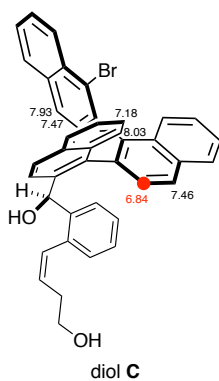

diol C

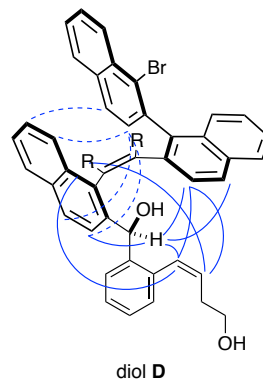

diol D

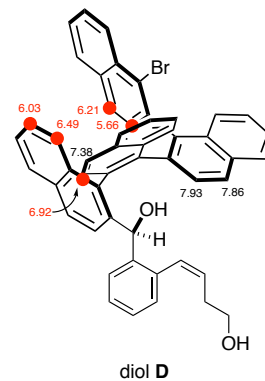

diol D

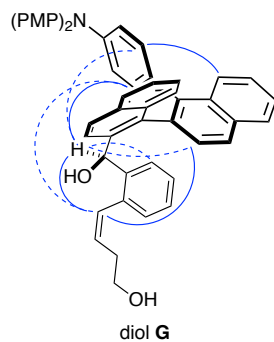

diol G

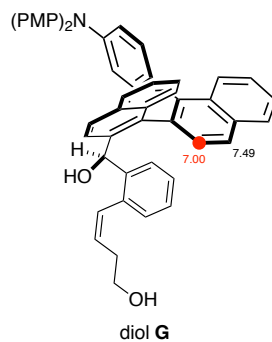

diol G

## Evaluation of Catalysts and Conditions

### General Procedure C for the examination of catalysts and conditions of the diastereoselective arene-forming aldol condensation:

The in situ double-oxidations were performed in batches for several entries (3.0–4.0 mg of the diol per entry) using IBX (5.0–10 eq.) in MeCN (1.0 mL per entry) at 60 °C. After complete oxidation (monitored by  $^1\text{H}$  NMR) the mixture was filtered, concentrated *in vacuo* and to the residue was added  $\text{CHCl}_3$  (1.0 mL per entry). The mixture was filtered again and distributed into portions. For entries with  $\text{CHCl}_3$  as solvent: co-solvents and catalysts were added directly. For entries with other solvents: solution was concentrated *in vacuo* and the residue dissolved in the solvent of choice. For entries with a temperature below RT: solution was cooled and catalyst (followed by base) was added. The mixtures were stirred for 14–20 h and poured on aq. sat.  $\text{NH}_4\text{Cl}$  (2.5 mL) and  $\text{H}_2\text{O}$  (2.5 mL). The layers were separated and the aqueous layer was extracted with  $\text{CH}_2\text{Cl}_2$  (5.0 mL). The combined organic layers were concentrated *in vacuo* (co-evaporation with toluene for entries with DMF) and analyzed by  $^1\text{H}$  NMR. The yields were estimated by integration of the product aldehyde peaks in comparison with aromatic signals.

### Catalyst list<sup>[5]</sup>

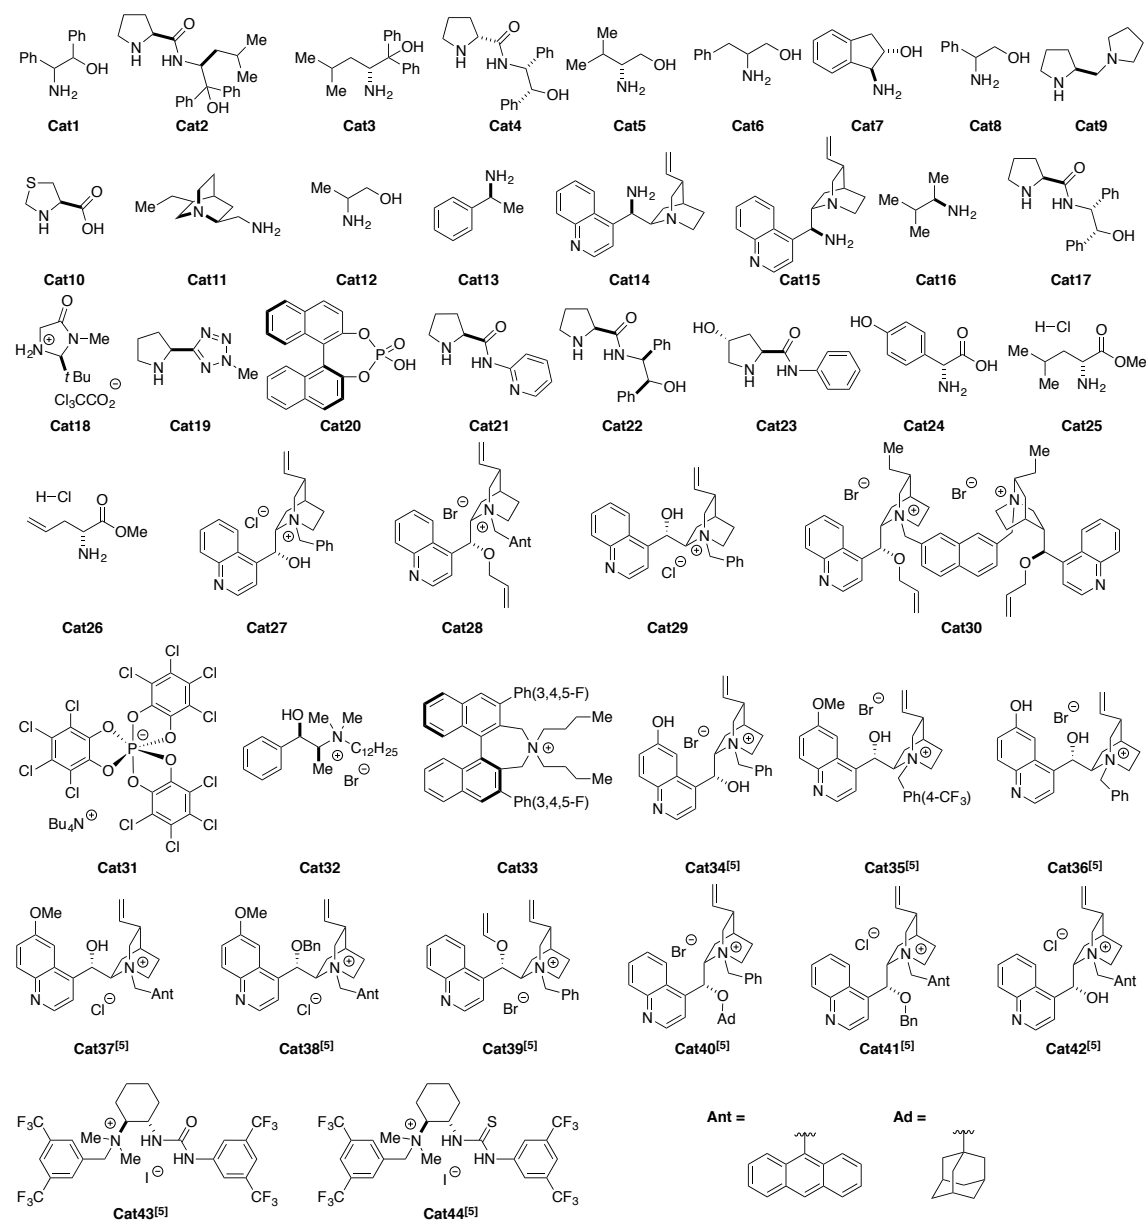

## Initial examination of catalysts and conditions for (*R*<sub>a</sub>,*S*<sub>a</sub>)-7 and (*S*<sub>a</sub>,*S*<sub>a</sub>)-8

The reactions were performed according to the general procedure B.

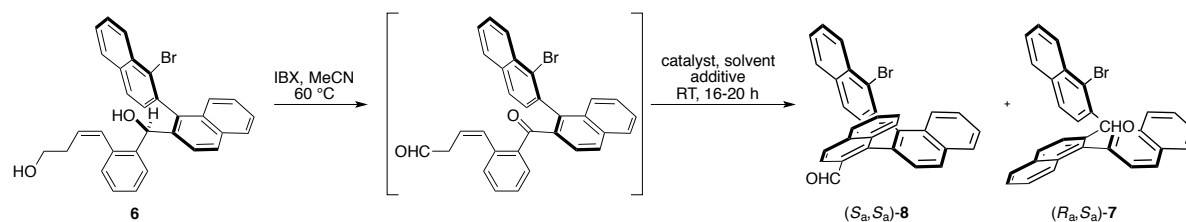

| Entry | Catalyst <sup>1</sup>                | Solvent 1         | Solvent 2            | Solvent 3        | Solvent Ratio | Additive                                      | d.r. 8:7 | Estimated Yield  |
|-------|--------------------------------------|-------------------|----------------------|------------------|---------------|-----------------------------------------------|----------|------------------|
| 1     | ( <i>S</i> )-Tet                     | CDCl <sub>3</sub> | DMF                  | H <sub>2</sub> O | 3/1/1         |                                               | 92:8     | 46% <sup>2</sup> |
| 2     | ( <i>R</i> )-Tet                     | CDCl <sub>3</sub> | DMF                  | H <sub>2</sub> O | 3/1/1         |                                               | 2:98     | <5% <sup>2</sup> |
| 3     | L-Met                                | CDCl <sub>3</sub> | DMF                  | H <sub>2</sub> O | 3/1/1         |                                               | 92:8     | <5%              |
| 4     | ( <i>S,S</i> )-Cat1                  | CDCl <sub>3</sub> | DMF                  | H <sub>2</sub> O | 3/1/1         |                                               | 97:3     | <5%              |
| 5     | Cat2                                 | CDCl <sub>3</sub> | DMF                  | H <sub>2</sub> O | 3/1/1         |                                               |          | <5%              |
| 6     | Cat3                                 | CDCl <sub>3</sub> | DMF                  | H <sub>2</sub> O | 3/1/1         |                                               |          | <5%              |
| 7     | Cat4                                 | CDCl <sub>3</sub> | DMF                  | H <sub>2</sub> O | 3/1/1         |                                               |          | <5%              |
| 8     | Cat5                                 | CDCl <sub>3</sub> | DMF                  | H <sub>2</sub> O | 3/1/1         |                                               |          | <5%              |
| 9     | ( <i>S</i> )-Cat6                    | CDCl <sub>3</sub> | DMF                  | H <sub>2</sub> O | 3/1/1         |                                               | 97:3     | ~35%             |
| 10    | Cat7                                 | CDCl <sub>3</sub> | DMF                  | H <sub>2</sub> O | 3/1/1         |                                               | 40:60    | <5%              |
| 11    | ( <i>R,S</i> )-Cat1                  | CDCl <sub>3</sub> | DMF                  | H <sub>2</sub> O | 3/1/1         |                                               | 95:5     | ~15%             |
| 12    | ( <i>S,R</i> )-Cat1                  | CDCl <sub>3</sub> | DMF                  | H <sub>2</sub> O | 3/1/1         |                                               | 36:64    | <5%              |
| 13    | ( <i>R,R</i> )-Cat1                  | CDCl <sub>3</sub> | DMF                  | H <sub>2</sub> O | 3/1/1         |                                               | 8:92     | ~15%             |
| 14    | ( <i>R</i> )-Cat6                    | CDCl <sub>3</sub> | DMF                  | H <sub>2</sub> O | 3/1/1         |                                               | 12:88    | ~20%             |
| 15    | ( <i>R</i> )-Cat8                    | CDCl <sub>3</sub> | DMF                  | H <sub>2</sub> O | 3/1/1         |                                               | 10:90    | ~20%             |
| 16    | Glycinol                             | CDCl <sub>3</sub> | DMF                  | H <sub>2</sub> O | 3/1/1         |                                               | 36:64    | <5%              |
| 17    | <i>i</i> -Pr <sub>2</sub> NH         | CDCl <sub>3</sub> | DMF                  | H <sub>2</sub> O | 3/1/1         |                                               | 7:93     | ~10%             |
| 18    | Pyrrolidine                          | CDCl <sub>3</sub> | DMF                  | H <sub>2</sub> O | 3/1/1         |                                               |          | <5%              |
| 19    | Piperidine                           | CDCl <sub>3</sub> | DMF                  | H <sub>2</sub> O | 3/1/1         |                                               | 42:58    | ~5%              |
| 20    | Me <sub>2</sub> -piperidine          | CDCl <sub>3</sub> | DMF                  | H <sub>2</sub> O | 3/1/1         |                                               | 5:95     | ~5%              |
| 21    | (H <sub>4</sub> )-quinoline          | CDCl <sub>3</sub> | DMF                  | H <sub>2</sub> O | 3/1/1         |                                               |          | <5%              |
| 22    | Cy <sub>2</sub> NH                   | CDCl <sub>3</sub> | DMF                  | H <sub>2</sub> O | 3/1/1         |                                               | <5:95    | <5%              |
| 23    | Bn <sub>2</sub> NH                   | CDCl <sub>3</sub> | DMF                  | H <sub>2</sub> O | 3/1/1         |                                               |          | <5%              |
| 24    | Morpholine                           | CDCl <sub>3</sub> | DMF                  | H <sub>2</sub> O | 3/1/1         |                                               |          | <5%              |
| 25    | Me <sub>4</sub> -piperidine          | CDCl <sub>3</sub> | DMF                  | H <sub>2</sub> O | 3/1/1         |                                               | <5:95    | ~5%              |
| 26    | Me <sub>2</sub> N-Et-NH <sub>2</sub> | CDCl <sub>3</sub> | DMF                  | H <sub>2</sub> O | 3/1/1         |                                               |          | ~5%              |
| 27    | Me <sub>2</sub> N-Et-NMeH            | CDCl <sub>3</sub> | DMF                  | H <sub>2</sub> O | 3/1/1         |                                               | 50:50    | <5%              |
| 28    | Ph <sub>2</sub> NH                   | CDCl <sub>3</sub> | DMF                  | H <sub>2</sub> O | 3/1/1         |                                               | 13:87    | <5%              |
| 29    | Aniline                              | CDCl <sub>3</sub> | DMF                  | H <sub>2</sub> O | 3/1/1         |                                               |          | ~5%              |
| 30    | Me <sub>2</sub> NH <sup>+</sup> HCl  | CDCl <sub>3</sub> | DMF                  | H <sub>2</sub> O | 3/1/1         |                                               |          | <5%              |
| 31    | ( <i>R</i> )-Tet                     | CDCl <sub>3</sub> |                      | H <sub>2</sub> O | 3/0/1         |                                               | 2:98     | <5%              |
| 32    | ( <i>R</i> )-Tet                     | CDCl <sub>3</sub> | DMF                  | H <sub>2</sub> O | 30/1/10       |                                               | 2:98     | <5%              |
| 33    | ( <i>R</i> )-Tet                     | CDCl <sub>3</sub> | DMF                  | H <sub>2</sub> O | 6/1/1         |                                               | 2:98     | <5%              |
| 34    | ( <i>R</i> )-Tet                     | CDCl <sub>3</sub> | DMF                  | H <sub>2</sub> O | 30/1/30       |                                               | 2:98     | <5%              |
| 35    | ( <i>R</i> )-Tet                     | CDCl <sub>3</sub> | Toluene              |                  | 1/1/0         |                                               |          | <5%              |
| 36    | ( <i>R</i> )-Tet                     | CDCl <sub>3</sub> | Br-benzene           |                  | 1/1/0         |                                               |          | <5%              |
| 37    | ( <i>R</i> )-Tet                     | CDCl <sub>3</sub> | MeNO <sub>2</sub>    |                  | 1/1/0         |                                               |          | <5%              |
| 38    | ( <i>R</i> )-Tet                     | CDCl <sub>3</sub> | Et(OMe) <sub>2</sub> |                  | 1/1/0         |                                               |          | <5%              |
| 39    | ( <i>R</i> )-Tet                     | CDCl <sub>3</sub> | EtOAc                |                  | 1/1/0         |                                               |          | <5%              |
| 40    | ( <i>R</i> )-Cat8                    | DMF               |                      |                  | 1/0/0         |                                               |          | <5%              |
| 41    | ( <i>R</i> )-Cat8                    | DMF               | H <sub>2</sub> O     |                  | 10/1/0        |                                               |          | <5%              |
| 42    | ( <i>R</i> )-Cat8                    | THF               |                      |                  | 1/0/0         |                                               |          | <5%              |
| 43    | ( <i>R</i> )-Cat8                    | THF               | H <sub>2</sub> O     |                  | 10/0/0        |                                               |          | <5%              |
| 44    | ( <i>R</i> )-Cat8                    | Toluene           |                      |                  | 1/0/0         |                                               |          | <5%              |
| 45    | ( <i>R</i> )-Cat8                    | Toluene           | H <sub>2</sub> O     |                  | 10/0/0        |                                               |          | <5%              |
| 46    | ( <i>R</i> )-Cat8                    | CDCl <sub>3</sub> | DMF                  |                  | 3/1/0         |                                               |          | <5%              |
| 47    | ( <i>R</i> )-Cat8                    | DMSO              |                      |                  | 1/0/0         |                                               |          | <5%              |
| 48    | ( <i>R,R</i> )-Cat1                  | DMF               |                      |                  | 1/0/0         |                                               |          | <5%              |
| 49    | ( <i>R,R</i> )-Cat1                  | DMF               | H <sub>2</sub> O     |                  | 10/1/0        |                                               |          | <5%              |
| 50    | ( <i>R,R</i> )-Cat1                  | THF               |                      |                  | 1/0/0         |                                               |          | <5%              |
| 51    | ( <i>R,R</i> )-Cat1                  | THF               | H <sub>2</sub> O     |                  | 10/0/0        |                                               |          | <5%              |
| 52    | ( <i>R,R</i> )-Cat1                  | Toluene           |                      |                  | 1/0/0         |                                               |          | <5%              |
| 53    | ( <i>R,R</i> )-Cat1                  | Toluene           | H <sub>2</sub> O     |                  | 10/0/0        |                                               |          | <5%              |
| 54    | ( <i>R,R</i> )-Cat1                  | CDCl <sub>3</sub> | DMF                  |                  | 3/1/0         |                                               |          | <5%              |
| 55    | ( <i>R,R</i> )-Cat1                  | DMSO              |                      |                  | 1/0/0         |                                               |          | <5%              |
| 56    | ( <i>R</i> )-Cat8                    | CDCl <sub>3</sub> | DMF                  | H <sub>2</sub> O | 3/1/1         | Drop AcOH                                     | 19:81    | ~15%             |
| 57    | ( <i>R</i> )-Cat8                    | CDCl <sub>3</sub> | DMF                  | H <sub>2</sub> O | 3/1/1         | Drop HCl (1.0 molL <sup>-1</sup> )            |          |                  |
| 58    | ( <i>R</i> )-Cat8                    | CDCl <sub>3</sub> | DMF                  | H <sub>2</sub> O | 3/1/1         | Drop conc. NH <sub>4</sub> Cl                 | 12:88    | ~15%             |
| 59    | ( <i>R</i> )-Cat8                    | CDCl <sub>3</sub> | DMF                  | H <sub>2</sub> O | 3/1/1         | Drop NaOH (1.0 molL <sup>-1</sup> )           | 22:78    | <5%              |
| 60    | ( <i>R</i> )-Cat8                    | CDCl <sub>3</sub> | DMF                  | H <sub>2</sub> O | 3/1/1         | Drop aq. H <sub>2</sub> SO <sub>4</sub> (20%) |          |                  |

| Entry | Catalyst <sup>1</sup> | Solvent 1         | Solvent 2 | Solvent 3        | Solvent Ratio | Additive                                                     | d.r. 8:7 | Estimated Yield  |
|-------|-----------------------|-------------------|-----------|------------------|---------------|--------------------------------------------------------------|----------|------------------|
| 61    | (R)-Cat8              | CDCl <sub>3</sub> | DMF       | H <sub>2</sub> O | 3/1/1         | Drop aq. NH <sub>4</sub> OH (25%)                            | 10:90    | ~15%             |
| 62    | (R)-Cat8              | CDCl <sub>3</sub> | DMF       | Additive         | 3/1/1         | Aq. sat. Na <sub>2</sub> CO <sub>3</sub>                     | 8:92     | ~20%             |
| 63    | (R)-Cat8              | CDCl <sub>3</sub> | DMF       | Additive         | 3/1/1         | Citrate buffer pH 5                                          | 11:89    | ~20%             |
| 64    | (R)-Cat8              | CDCl <sub>3</sub> | DMF       | Additive         | 3/1/1         | Phosphate buffer pH 8                                        | 16:84    | <5%              |
| 65    | (R)-Cat8              | CDCl <sub>3</sub> | DMF       | Additive         | 3/1/1         | Borate buffer pH 10                                          |          |                  |
| 66    | (R)-Cat8              | CDCl <sub>3</sub> | DMF       | H <sub>2</sub> O | 3/1/1         | NH <sub>4</sub> OAc (ca 0.2 mg)                              | 16:84    | ~15%             |
| 67    | (R)-Cat8              | CDCl <sub>3</sub> | DMF       | Additive         | 3/1/1         | Aq. sat. Na <sub>2</sub> CO <sub>3</sub>                     | 8:92     | ~20%             |
| 68    | (R)-Cat8              | CDCl <sub>3</sub> | DMF       | Additive         | 3/1/1         | Aq. sat. NaHCO <sub>3</sub>                                  | 9:91     | ~5%              |
| 69    | (R)-Cat8              | CDCl <sub>3</sub> | DMF       | Additive         | 3/1/1         | Aq. sat. K <sub>2</sub> CO <sub>3</sub>                      | 6:94     | ~40%             |
| 70    | (R)-Cat8              | CDCl <sub>3</sub> | DMF       | Additive         | 3/1/1         | Aq. sat. Na <sub>2</sub> SO <sub>4</sub>                     | 11:89    | ~5%              |
| 71    | (R)-Cat8              | CDCl <sub>3</sub> | DMF       | Additive         | 3/1/1         | Aq. sat. Na <sub>2</sub> SO <sub>3</sub>                     | 10:90    | ~10%             |
| 72    | (R)-Cat8              | CDCl <sub>3</sub> | DMF       | Additive         | 3/1/1         | Aq. sat. KNO <sub>3</sub>                                    | 9:91     | ~15%             |
| 73    | (R)-Cat8              | CDCl <sub>3</sub> | DMF       | Additive         | 3/1/1         | Aq. sat. NaOAc                                               | 12:88    | ~5%              |
| 74    | (R)-Cat8              | CDCl <sub>3</sub> | DMF       | Additive         | 3/1/1         | Aq. sat. NaCl                                                | 8:92     | ~15%             |
| 75    | (R)-Cat8              | CDCl <sub>3</sub> | DMF       | Additive         | 3/1/1         | Aq. sat. CaCl <sub>2</sub>                                   | 48:52    | <5%              |
| 76    | (R)-Cat8              | CDCl <sub>3</sub> | DMF       | Additive         | 3/1/1         | Aq. sat. NaH <sub>2</sub> PO <sub>4</sub>                    | 7:93     | ~5%              |
| 77    | (R)-Cat8              | CDCl <sub>3</sub> | DMF       | Additive         | 3/1/1         | Aq. sat. Na <sub>2</sub> HPO <sub>4</sub>                    | 16:84    | ~5%              |
| 78    | (R)-Cat8              | CDCl <sub>3</sub> | DMF       | Additive         | 3/1/1         | Citrate buffer pH 6                                          | 12:88    | ~10%             |
| 79    | (R)-Cat8              | CDCl <sub>3</sub> | DMF       | Additive         | 3/1/1         | Aq. K <sub>2</sub> CO <sub>3</sub> (8.0 molL <sup>-1</sup> ) | 7:93     | ~35%             |
| 80    | (R)-Cat8              | CDCl <sub>3</sub> | DMF       | Additive         | 3/1/1         | Aq. K <sub>2</sub> CO <sub>3</sub> (1.0 molL <sup>-1</sup> ) | 6:94     | ~25%             |
| 81    | (R)-Cat8              | CDCl <sub>3</sub> | DMF       | Additive         | 3/1/1         | Aq. K <sub>2</sub> CO <sub>3</sub> (0.1 molL <sup>-1</sup> ) | 10:90    | ~10%             |
| 82    | (S)-Cat6              | CDCl <sub>3</sub> | DMF       | H <sub>2</sub> O | 3/1/1         |                                                              | 95:5     | ~40%             |
| 83    | (S)-Cat6              | CDCl <sub>3</sub> | DMF       | Additive         | 3/1/1         | Aq. K <sub>2</sub> CO <sub>3</sub> (4.0 molL <sup>-1</sup> ) | 7:93     | ~35%             |
| 84    |                       | CDCl <sub>3</sub> | DMF       | Additive         | 3/1/1         | Aq. sat. K <sub>2</sub> CO <sub>3</sub>                      | 8:92     | 48% <sup>2</sup> |
| 85    |                       | CDCl <sub>3</sub> |           | Additive         | 3/1/1         | Aq. sat. K <sub>2</sub> CO <sub>3</sub>                      | 18:82    | 64% <sup>2</sup> |
| 86    | Cat27                 | CDCl <sub>3</sub> |           | Additive         | 5/0/1         | Aq. KOH (1.0 molL <sup>-1</sup> )                            | 5:95     | ~60%             |
| 87    | Cat28                 | CDCl <sub>3</sub> |           | Additive         | 5/0/1         | Aq. KOH (1.0 molL <sup>-1</sup> )                            |          | <5%              |
| 88    | Cat29                 | CDCl <sub>3</sub> |           | Additive         | 5/0/1         | Aq. KOH (1.0 molL <sup>-1</sup> )                            | 10:90    | ~45%             |
| 89    | Cat30                 | CDCl <sub>3</sub> |           | Additive         | 5/0/1         | Aq. KOH (1.0 molL <sup>-1</sup> )                            | 8:92     | ~35%             |
| 90    | Cat31                 | CDCl <sub>3</sub> |           | Additive         | 5/0/1         | Aq. KOH (1.0 molL <sup>-1</sup> )                            | 21:79    | ~55%             |
| 91    | Cat32                 | CDCl <sub>3</sub> |           | Additive         | 5/0/1         | Aq. KOH (1.0 molL <sup>-1</sup> )                            | 24:76    | ~50%             |
| 92    | Cat33                 | CDCl <sub>3</sub> |           | Additive         | 5/0/1         | Aq. KOH (1.0 molL <sup>-1</sup> )                            | 22:78    | ~20%             |
| 93    | Cat34                 | CDCl <sub>3</sub> |           | Additive         | 5/0/1         | Aq. KOH (1.0 molL <sup>-1</sup> )                            | 34:66    | ~45%             |
| 94    | Cat35                 | CDCl <sub>3</sub> |           | Additive         | 5/0/1         | Aq. KOH (1.0 molL <sup>-1</sup> )                            | 11:89    | ~50%             |
| 95    | Cat36                 | CDCl <sub>3</sub> |           | Additive         | 5/0/1         | Aq. KOH (1.0 molL <sup>-1</sup> )                            | 15:85    | ~35%             |
| 96    | Cat37                 | CDCl <sub>3</sub> |           | Additive         | 5/0/1         | Aq. KOH (1.0 molL <sup>-1</sup> )                            | 31:69    | ~30%             |
| 97    | Cat38                 | CDCl <sub>3</sub> |           | Additive         | 5/0/1         | Aq. KOH (1.0 molL <sup>-1</sup> )                            |          | <5%              |
| 98    | Cat39                 | CDCl <sub>3</sub> |           | Additive         | 5/0/1         | Aq. KOH (1.0 molL <sup>-1</sup> )                            | 9:91     | ~35%             |
| 99    | Cat40                 | CDCl <sub>3</sub> |           | Additive         | 5/0/1         | Aq. KOH (1.0 molL <sup>-1</sup> )                            | 5:95     | ~60%             |
| 100   | Cat41                 | CDCl <sub>3</sub> |           | Additive         | 5/0/1         | Aq. KOH (1.0 molL <sup>-1</sup> )                            |          | <5%              |
| 101   | Cat42                 | CDCl <sub>3</sub> |           | Additive         | 5/0/1         | Aq. KOH (1.0 molL <sup>-1</sup> )                            | 7:93     | ~45%             |
| 102   | Cat43                 | CDCl <sub>3</sub> |           | Additive         | 5/0/1         | Aq. KOH (1.0 molL <sup>-1</sup> )                            | 26:74    | ~60%             |
| 103   | Cat44                 | CDCl <sub>3</sub> |           | Additive         | 5/0/1         | Aq. KOH (1.0 molL <sup>-1</sup> )                            | 53:47    | ~60%             |
| 104   |                       | CDCl <sub>3</sub> |           | Additive         | 5/0/1         | Aq. KOH (1.0 molL <sup>-1</sup> )                            | 23:77    | ~55%             |

<sup>1</sup> 40 mol%; <sup>2</sup> isolated yield. (S)-Tet: (S)-5-(pyrrolidin-2-yl)-1H-tetrazole; (R)-Tet: (R)-5-(pyrrolidin-2-yl)-1H-tetrazole.

## Final examination of catalysts and conditions for (R<sub>a</sub>,S<sub>a</sub>)-7 and (S<sub>a</sub>,S<sub>a</sub>)-8

The in situ double-oxidation was performed according to the general procedure **B** using **6** (50.8 mg, 99.7 μmol, 1.00 eq.) and IBX (83.8 mg, 299 μmol, 3.00 eq.) with 4 h reaction time. After the optional solvent switch, catalyst and the additive were added. The mixture was stirred for a given time at RT, aq. sat. NH<sub>4</sub>Cl (5.0 mL) and H<sub>2</sub>O (5.0 mL) were added, the layers were separated and the aq. layer was extracted with CH<sub>2</sub>Cl<sub>2</sub> (2x 10 mL). The combined organic layers were dried over Na<sub>2</sub>SO<sub>4</sub>, filtered and concentrated *in vacuo*. Purification by column chromatography (*n*-pentane:CH<sub>2</sub>Cl<sub>2</sub> 4:1 to 1:4) gave the aldol condensation product.

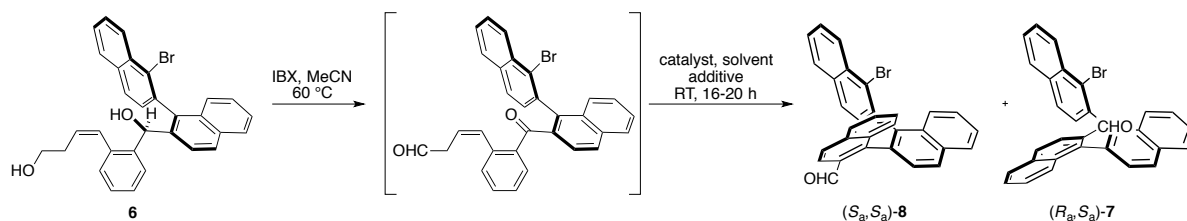

| Entry | Catalyst | Loading | Time | Solvent 1         | Solvent 2        | Solvent 3        | Solvent ratio | Additive                          | d.r. 7:8    | Isolated Yield |
|-------|----------|---------|------|-------------------|------------------|------------------|---------------|-----------------------------------|-------------|----------------|
| 1     |          |         | 24   | CHCl <sub>3</sub> | Additive         |                  |               | Aq. KOH (1.0 molL <sup>-1</sup> ) | 80:20       | 65%            |
| 2     | (S)-Tet  | 40      | 24   | CHCl <sub>3</sub> |                  |                  |               |                                   | 8:92        | 13%            |
| 3     | (S)-Tet  | 40      | 24   | DMF               | H <sub>2</sub> O |                  |               |                                   | 3:97        | 55%            |
| 4     | (S)-Tet  | 40      | 48   | CHCl <sub>3</sub> | DMF              | H <sub>2</sub> O |               |                                   | 4:96        | 54%            |
| 5     | (S)-Tet  | 40      | 48   | CHCl <sub>3</sub> | DMF              | Additive         |               | Citrate buffer pH 5               | <b>3:97</b> | <b>75%</b>     |
| 6     | (R)-Tet  | 40      | 48   | CHCl <sub>3</sub> | DMF              |                  |               | Citrate buffer pH 5               | 96:4        | 64%            |
| 7     | Cat29    | 10      | 24   | CHCl <sub>3</sub> | Additive         |                  |               | Aq. KOH (1.0 molL <sup>-1</sup> ) | 89:11       | 54%            |
| 8     | Cat33    | 10      | 24   | CHCl <sub>3</sub> | Additive         |                  |               | Aq. KOH (1.0 molL <sup>-1</sup> ) | 78:22       | 44%            |
| 9     | Cat28    | 10      | 24   | CHCl <sub>3</sub> | Additive         |                  |               | Aq. KOH (1.0 molL <sup>-1</sup> ) | 78:22       | 18%            |
| 10    | Cat27    | 10      | 24   | CHCl <sub>3</sub> | Additive         |                  |               | Aq. KOH (1.0 molL <sup>-1</sup> ) | 94:6        | 72%            |
| 11    | Cat27    | 5       | 24   | CHCl <sub>3</sub> | Additive         |                  |               | Aq. KOH (1.0 molL <sup>-1</sup> ) | 94:6        | 70%            |
| 12    | Cat27    | 1       | 24   | CHCl <sub>3</sub> | Additive         |                  |               | Aq. KOH (1.0 molL <sup>-1</sup> ) | 94:6        | <b>69%</b>     |

(S)-Tet: (S)-5-(pyrrolidin-2-yl)-1H-tetrazole; (R)-Tet: (R)-5-(pyrrolidin-2-yl)-1H-tetrazole.

### Examination of catalysts and conditions for (R<sub>a</sub>,S<sub>a</sub>,S<sub>a</sub>)-13 and (S<sub>a</sub>,S<sub>a</sub>,S<sub>a</sub>)-14

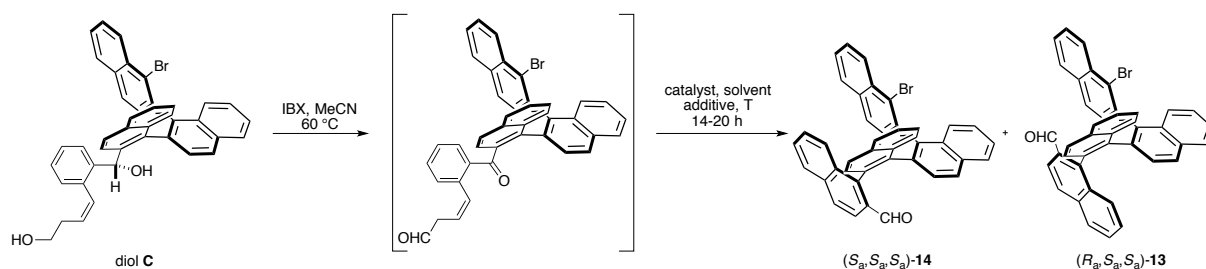

| Entry | Catalyst (mol%) | Solvent 1         | Solvent 2 | Solvent 3        | Solvent Ratio | Additive | d.r. 14:13 | Estimated Yield |
|-------|-----------------|-------------------|-----------|------------------|---------------|----------|------------|-----------------|
| 1     | (R,R)-Cat1 (40) | CDCl <sub>3</sub> | DMF       | H <sub>2</sub> O | 3/1/1         |          |            | <5%             |
| 2     | (S,S)-Cat1 (40) | CDCl <sub>3</sub> | DMF       | H <sub>2</sub> O | 3/1/1         |          |            |                 |
| 3     | (R,S)-Cat1 (40) | CDCl <sub>3</sub> | DMF       | H <sub>2</sub> O | 3/1/1         |          |            |                 |
| 4     | (S,R)-Cat1 (40) | CDCl <sub>3</sub> | DMF       | H <sub>2</sub> O | 3/1/1         |          |            |                 |
| 5     | (S)-Cat6 (40)   | CDCl <sub>3</sub> | DMF       | H <sub>2</sub> O | 3/1/1         |          |            | <5%             |
| 6     | (R)-Cat6 (40)   | CDCl <sub>3</sub> | DMF       | H <sub>2</sub> O | 3/1/1         |          |            | <5%             |
| 7     | (S)-Cat8 (40)   | CDCl <sub>3</sub> | DMF       | H <sub>2</sub> O | 3/1/1         |          |            | <5%             |
| 8     | (S)-Tet (40)    | CDCl <sub>3</sub> | DMF       | H <sub>2</sub> O | 3/1/1         |          |            |                 |
| 9     | (R)-Tet (40)    | CDCl <sub>3</sub> | DMF       | H <sub>2</sub> O | 3/1/1         |          |            |                 |
| 10    | Cat9 (40)       | CDCl <sub>3</sub> | DMF       | H <sub>2</sub> O | 3/1/1         |          |            | <5%             |
| 11    | Cat10 (40)      | CDCl <sub>3</sub> | DMF       | H <sub>2</sub> O | 3/1/1         |          |            |                 |
| 12    | Cat11 (40)      | CDCl <sub>3</sub> | DMF       | H <sub>2</sub> O | 3/1/1         |          |            | <5%             |
| 13    | L-Ile (40)      | CDCl <sub>3</sub> | DMF       | H <sub>2</sub> O | 3/1/1         |          |            |                 |
| 14    | L-Pro (40)      | CDCl <sub>3</sub> | DMF       | H <sub>2</sub> O | 3/1/1         |          |            |                 |
| 15    | L-Met (40)      | CDCl <sub>3</sub> | DMF       | H <sub>2</sub> O | 3/1/1         |          |            |                 |
| 16    | L-Tyr (40)      | CDCl <sub>3</sub> | DMF       | H <sub>2</sub> O | 3/1/1         |          |            |                 |
| 17    | L-Ala (40)      | CDCl <sub>3</sub> | DMF       | H <sub>2</sub> O | 3/1/1         |          |            |                 |
| 18    | (R,R)-Cat1 (40) | CDCl <sub>3</sub> |           |                  |               |          |            |                 |
| 19    | (R)-Cat6 (40)   | CDCl <sub>3</sub> |           |                  |               |          |            | <5%             |
| 20    | (S)-Cat12 (40)  | CDCl <sub>3</sub> |           |                  |               |          |            | <5%             |
| 21    | (R)-Cat8 (40)   | CDCl <sub>3</sub> |           |                  |               |          |            |                 |
| 22    | (S)-Cat11 (40)  | CDCl <sub>3</sub> |           |                  |               |          |            | <5%             |
| 23    | Cat13 (40)      | CDCl <sub>3</sub> |           |                  |               |          |            |                 |
| 24    | Cat14 (40)      | CDCl <sub>3</sub> |           |                  |               |          |            |                 |
| 25    | Cat15 (40)      | CDCl <sub>3</sub> |           |                  |               |          |            |                 |
| 26    | Cat16 (40)      | CDCl <sub>3</sub> |           |                  |               |          |            |                 |
| 27    | Cat17 (40)      | CDCl <sub>3</sub> |           |                  |               |          |            | <5%             |
| 28    | L-Lys (40)      | CDCl <sub>3</sub> |           |                  |               |          |            |                 |
| 29    | (R)-Cat6 (40)   | DCE               |           |                  |               |          | 95:5       | ~10%            |
| 30    | (R)-Cat6 (40)   | Toluene           |           |                  |               |          | 90:10      | <5%             |
| 31    | (R)-Cat6 (40)   | THF               |           |                  |               |          |            | <5%             |
| 32    | (R)-Cat6 (40)   | EtOAc             |           |                  |               |          |            | <5%             |
| 33    | (R)-Cat6 (40)   | MeCN              |           |                  |               |          |            | <5%             |

| Entry | Catalyst<br>(mol%)                   | Solvent 1                       | Solvent 2        | Solvent 3        | Solvent<br>Ratio | Additive                                | d.r.<br>14:13 | Estimated<br>Yield |
|-------|--------------------------------------|---------------------------------|------------------|------------------|------------------|-----------------------------------------|---------------|--------------------|
| 34    | ( <i>R</i> )-Cat6 (40)               | MTBE                            |                  |                  |                  |                                         |               | <1%                |
| 35    | ( <i>R</i> )-Cat8 (40)               | CH <sub>2</sub> Cl <sub>2</sub> |                  |                  |                  |                                         |               | ~5%                |
| 36    | Cat11 (40)                           | CH <sub>2</sub> Cl <sub>2</sub> |                  |                  |                  |                                         |               | <5%                |
| 37    | ( <i>S</i> )-Cat12 (40)              | CH <sub>2</sub> Cl <sub>2</sub> |                  |                  |                  |                                         |               | <5%                |
| 38    | Cat13 (40)                           | CH <sub>2</sub> Cl <sub>2</sub> |                  |                  |                  |                                         |               |                    |
| 39    | ( <i>R,R</i> )-Cat1 (40)             | CH <sub>2</sub> Cl <sub>2</sub> |                  |                  |                  |                                         |               |                    |
| 40    | Cat9 (40)                            | CH <sub>2</sub> Cl <sub>2</sub> |                  |                  |                  |                                         |               |                    |
| 41    | Cat17 (40)                           | CH <sub>2</sub> Cl <sub>2</sub> |                  |                  |                  |                                         |               |                    |
| 42    | Cat18 (40)                           | CH <sub>2</sub> Cl <sub>2</sub> |                  |                  |                  |                                         |               |                    |
| 43    | Cat19 (40)                           | CH <sub>2</sub> Cl <sub>2</sub> |                  |                  |                  |                                         |               |                    |
| 44    | L-Phe (40)                           | CH <sub>2</sub> Cl <sub>2</sub> |                  |                  |                  |                                         |               | <5%                |
| 45    | L-Ala (40)                           | CH <sub>2</sub> Cl <sub>2</sub> |                  |                  |                  |                                         |               |                    |
| 46    | L-Ser (40)                           | CH <sub>2</sub> Cl <sub>2</sub> |                  |                  |                  |                                         |               |                    |
| 47    | L-Met (40)                           | CH <sub>2</sub> Cl <sub>2</sub> |                  |                  |                  |                                         |               |                    |
| 48    | ( <i>R</i> )-Tet (40) <sup>1</sup>   | CH <sub>2</sub> Cl <sub>2</sub> |                  |                  |                  |                                         |               |                    |
| 49    | ( <i>R</i> )-Cat6 (40) <sup>1</sup>  | DCE                             |                  |                  |                  |                                         |               | <1%                |
| 50    | ( <i>R</i> )-Cat8 (40) <sup>1</sup>  | DCE                             |                  |                  |                  |                                         |               | <1%                |
| 51    | ( <i>R</i> )-Cat6 (40) <sup>2</sup>  | DCE                             |                  |                  |                  |                                         |               | <1%                |
| 52    | ( <i>R</i> )-Cat8 (40) <sup>2</sup>  | DCE                             |                  |                  |                  |                                         |               | <1%                |
| 53    | L-Phe (40) <sup>2</sup>              | DCE                             |                  |                  |                  |                                         |               | <1%                |
| 54    | ( <i>R</i> )-Cat12 (40) <sup>2</sup> | DCE                             |                  |                  |                  |                                         |               | <1%                |
| 55    | ( <i>S</i> )-Cat20 (40)              | Toluene                         |                  |                  |                  |                                         |               | <1%                |
| 56    | ( <i>S</i> )-Cat20 (40)              | CH <sub>2</sub> Cl <sub>2</sub> |                  |                  |                  |                                         |               | <1%                |
| 57    | ( <i>S</i> )-Cat20 (40)              | CDCl <sub>3</sub>               |                  |                  |                  |                                         |               |                    |
| 58    | ( <i>S</i> )-Cat20 (40)              | DCE                             |                  |                  |                  |                                         |               |                    |
| 59    | ( <i>S</i> )-Cat20 (40)              | THF                             |                  |                  |                  |                                         |               | <1%                |
| 60    | ( <i>S</i> )-Cat20 (40)              | MTBE                            |                  |                  |                  |                                         |               | <1%                |
| 61    | <i>n</i> -propylamine (~40)          | CDCl <sub>3</sub>               |                  |                  |                  |                                         | 95:5          | <5%                |
| 62    | <i>n</i> -propylamine (~40)          | CDCl <sub>3</sub>               | H <sub>2</sub> O |                  | 7/1/0            |                                         | 95:5          | <5%                |
| 63    | <i>n</i> -propylamine (~40)          | CDCl <sub>3</sub>               | DMF              | H <sub>2</sub> O | 3/1/1            |                                         | 65:35         | <5%                |
| 64    | ( <i>R</i> )-Tet (40)                | CDCl <sub>3</sub>               |                  |                  |                  |                                         |               | <1%                |
| 65    | ( <i>R</i> )-Tet (40)                | CDCl <sub>3</sub>               |                  |                  |                  | KHCO <sub>3</sub> (ca 10 mg)            |               | <1%                |
| 66    | ( <i>R</i> )-Tet (40)                | DMF                             | H <sub>2</sub> O |                  | 7/1/0            |                                         | 80:20         | ~10%               |
| 67    | ( <i>S</i> )-Tet (40)                | CDCl <sub>3</sub>               |                  |                  |                  |                                         |               | <1%                |
| 68    | ( <i>S</i> )-Tet (40)                | CDCl <sub>3</sub>               |                  |                  |                  | KHCO <sub>3</sub> (ca 10 mg)            | 95:5          | <5%                |
| 69    | ( <i>S</i> )-Tet (40)                | DMF                             | H <sub>2</sub> O |                  | 7/1/0            |                                         | 95:5          | ~5%                |
| 70    | L-Phe (40)                           | DMF                             | H <sub>2</sub> O |                  | 7/1/0            |                                         |               | <1%                |
| 71    | L-Ala (40)                           | DMF                             | H <sub>2</sub> O |                  | 7/1/0            |                                         |               | <1%                |
| 72    | L-Ser (40)                           | DMF                             | H <sub>2</sub> O |                  | 7/1/0            |                                         | 79:21         | 20%                |
| 73    | L-Ile (40)                           | DMF                             | H <sub>2</sub> O |                  | 7/1/0            |                                         |               | <1%                |
| 74    | D-Ile (40)                           | DMF                             | H <sub>2</sub> O |                  | 7/1/0            |                                         | 80:20         | 20%                |
| 75    | L-Met (40)                           | DMF                             | H <sub>2</sub> O |                  | 7/1/0            |                                         |               | <1%                |
| 76    | Gly (40)                             | DMF                             | H <sub>2</sub> O |                  | 7/1/0            |                                         | 73:27         | 10%                |
| 77    | L-Thr (40)                           | DMF                             | H <sub>2</sub> O |                  | 7/1/0            |                                         | 78:22         | 20%                |
| 78    | L-Leu (40)                           | DMF                             | H <sub>2</sub> O |                  | 7/1/0            |                                         | 56:44         | <5%                |
| 79    | L-Tyr (40)                           | DMF                             | H <sub>2</sub> O |                  | 7/1/0            |                                         |               | <1%                |
| 80    | L-Pro (40)                           | DMF                             | H <sub>2</sub> O |                  | 7/1/0            |                                         |               |                    |
| 81    | D-Ala (40)                           | DMF                             | H <sub>2</sub> O |                  | 7/1/0            |                                         | 70:30         | ~10%               |
| 82    | Cat21 (40)                           | DMF                             | H <sub>2</sub> O |                  | 7/1/0            |                                         |               | <1%                |
| 83    | D-Pro (40)                           | DMF                             | H <sub>2</sub> O |                  | 7/1/0            |                                         | 95:5          | <5%                |
| 84    | D-Val (40)                           | DMF                             | H <sub>2</sub> O |                  | 7/1/0            |                                         | 82:18         | ~15%               |
| 85    | ( <i>R</i> )-Cat8 (40)               | DMF                             | H <sub>2</sub> O |                  | 7/1/0            |                                         | 95:5          | <5%                |
| 86    | ( <i>R</i> )-Cat6 (40)               | DMF                             | H <sub>2</sub> O |                  | 7/1/0            |                                         | 95:5          | <5%                |
| 87    | ( <i>R,R</i> )-Cat1 (40)             | DMF                             | H <sub>2</sub> O |                  | 7/1/0            |                                         | 95:5          | <5%                |
| 88    | ( <i>S,S</i> )-Cat1 (40)             | DMF                             | H <sub>2</sub> O |                  | 7/1              |                                         | 95:5          | <5%                |
| 89    | ( <i>S,R</i> )-Cat1 (40)             | DMF                             | H <sub>2</sub> O |                  | 7/1              |                                         | 95:5          | <5%                |
| 90    | ( <i>R,S</i> )-Cat1 (40)             | DMF                             | H <sub>2</sub> O |                  | 7/1              |                                         | 95:5          | <5%                |
| 91    | Cat22 (40)                           | DMF                             | H <sub>2</sub> O |                  | 7/1              |                                         | 95:5          | <5%                |
| 92    | Cat23 (40)                           | DMF                             | H <sub>2</sub> O |                  | 7/1              |                                         | 95:5          | <5%                |
| 93    | ethanolamine (40)                    | DMF                             | H <sub>2</sub> O |                  | 7/1              |                                         | 30:70         | <5%                |
| 94    | D-Thr (40)                           | DMF                             | H <sub>2</sub> O |                  | 7/1              |                                         | 85:15         | ~20%               |
| 95    | Cat24 (40)                           | DMF                             | H <sub>2</sub> O |                  | 7/1              |                                         | 72:28         | <5%                |
| 96    | Cat25 (40)                           | DMF                             | H <sub>2</sub> O |                  | 7/1              |                                         | 95:5          | <5%                |
| 97    | Cat26 (40)                           | DMF                             | H <sub>2</sub> O |                  | 7/1              |                                         |               | <1%                |
| 98    | D-Cys (40)                           | DMF                             | H <sub>2</sub> O |                  | 7/1              |                                         |               | <1%                |
| 99    | ( <i>R</i> )-Cat12 (40)              | DMF                             | H <sub>2</sub> O |                  | 7/1              |                                         |               | <1%                |
| 100   | Cat16 (40)                           | DMF                             | H <sub>2</sub> O |                  | 7/1              |                                         | 24:76         | <5%                |
| 101   | Cy <sub>2</sub> NH                   | CDCl <sub>3</sub>               | DMF              | H <sub>2</sub> O | 3/1/1            |                                         |               |                    |
| 102   | <i>i</i> -Pr <sub>2</sub> NH         | CDCl <sub>3</sub>               | DMF              | H <sub>2</sub> O | 3/1/1            |                                         |               |                    |
| 103   | Pyrrolidine                          | CDCl <sub>3</sub>               | DMF              | H <sub>2</sub> O | 3/1/1            |                                         |               |                    |
| 104   | <i>i</i> -Pr <sub>2</sub> NH         | CDCl <sub>3</sub>               |                  |                  |                  |                                         |               |                    |
| 105   | Pyridine                             | CDCl <sub>3</sub>               |                  |                  |                  |                                         |               |                    |
| 106   | AcOH                                 | CDCl <sub>3</sub>               |                  |                  |                  |                                         |               |                    |
| 107   |                                      | CDCl <sub>3</sub>               | DMF              | Additive         | 3/1/1            | Citrate buffer pH 5                     |               | < %                |
| 108   |                                      | CDCl <sub>3</sub>               | DMF              | Additive         | 3/1/1            | Aq. sat. K <sub>2</sub> CO <sub>3</sub> | 21:79         | 35%                |

| Entry | Catalyst (mol%)         | Solvent 1                       | Solvent 2                       | Solvent 3        | Solvent Ratio | Additive                                                     | d.r. 14:13          | Estimated Yield |
|-------|-------------------------|---------------------------------|---------------------------------|------------------|---------------|--------------------------------------------------------------|---------------------|-----------------|
| 109   | TiCl <sub>4</sub> (100) | CDCl <sub>3</sub>               |                                 | Additive         | 3/0/1         | Aq. sat. K <sub>2</sub> CO <sub>3</sub>                      | 33:66               | 65%             |
| 110   |                         | MeCN                            |                                 | Additive         | 3/0/1         | Aq. sat. K <sub>2</sub> CO <sub>3</sub>                      |                     |                 |
| 111   |                         | CDCl <sub>3</sub>               |                                 |                  |               |                                                              |                     |                 |
| 112   |                         | CDCl <sub>3</sub>               |                                 |                  |               | KOrBu (ca 10 eq)                                             | 35:65               | 65%             |
| 113   |                         | CDCl <sub>3</sub>               |                                 |                  |               | NaH (ca 10 eq)                                               | 42:58               | 55%             |
| 114   |                         | CDCl <sub>3</sub>               |                                 | Additive         | 3/0/1         | Citrate buffer pH 5                                          |                     |                 |
| 115   |                         | CDCl <sub>3</sub>               |                                 | Additive         | 3/0/1         | Citrate buffer pH 6                                          |                     |                 |
| 116   |                         | CDCl <sub>3</sub>               |                                 | Additive         | 3/0/1         | Aq. sat. NH <sub>4</sub> Cl                                  |                     |                 |
| 117   |                         | CDCl <sub>3</sub>               |                                 | Additive         | 3/0/1         | Aq. NH <sub>4</sub> OH (25%)                                 | 88:12               | 35%             |
| 118   |                         | CDCl <sub>3</sub>               |                                 | Additive         | 3/0/1         | Aq. sat. Na <sub>2</sub> CO <sub>3</sub>                     |                     |                 |
| 119   |                         | CDCl <sub>3</sub>               |                                 | Additive         | 3/0/1         | Aq. sat. Cs <sub>2</sub> CO <sub>3</sub>                     | 35:65               | 5%              |
| 120   | (R)-Cat6 (40)           | CDCl <sub>3</sub>               |                                 | Additive         | 3/0/1         | Aq. sat. KNO <sub>3</sub>                                    |                     |                 |
| 121   |                         | CDCl <sub>3</sub>               |                                 | Additive         | 3/0/1         | Aq. sat. NaCl                                                |                     |                 |
| 122   |                         | CDCl <sub>3</sub>               |                                 | Additive         | 3/0/1         | Aq. NaOH (1.0 molL <sup>-1</sup> )                           | 13:87               | 60%             |
| 123   |                         | CDCl <sub>3</sub>               |                                 | Additive         | 3/0/1         | Aq. KOH (1.0 molL <sup>-1</sup> )                            | 14:86               | 65%             |
| 124   |                         | CDCl <sub>3</sub>               |                                 | Additive         | 3/0/1         | Aq. sat. K <sub>2</sub> CO <sub>3</sub>                      | 33:66               | 65%             |
| 125   |                         | CDCl <sub>3</sub>               | DMF                             | Additive         | 3/1/1         | Citrate buffer pH 5                                          | 92:8                | <5%             |
| 126   |                         | CDCl <sub>3</sub>               | DMF                             | Additive         | 3/1/1         | Citrate buffer pH 6                                          |                     | <1%             |
| 127   |                         | CDCl <sub>3</sub>               | DMF                             | Additive         | 3/1/1         | Phosphate buffer pH 7.4                                      |                     | <1%             |
| 128   |                         | CDCl <sub>3</sub>               | DMF                             | Additive         | 3/1/1         | Phosphate buffer pH 8                                        |                     | <1%             |
| 129   |                         | CDCl <sub>3</sub>               | DMF                             | Additive         | 3/1/1         | Aq. sat. NaCl                                                | 95:5                | <5%             |
| 130   | (R)-Cat6 (40)           | CDCl <sub>3</sub>               | DMF                             | Additive         | 3/1/1         | Aq. sat. KNO <sub>3</sub>                                    |                     | <1%             |
| 131   |                         | CDCl <sub>3</sub>               | DMF                             | Additive         | 3/1/1         | Aq. sat. NH <sub>4</sub> Cl                                  | 95:5                | <5%             |
| 132   |                         | CDCl <sub>3</sub>               | DMF                             | Additive         | 3/1/1         | Aq. AcOH (5%)                                                | 95:5                | <5%             |
| 133   |                         | CDCl <sub>3</sub>               |                                 | Additive         | 3/0/1         | Citrate buffer pH 6                                          | 95:5                | ~10%            |
| 134   |                         | CDCl <sub>3</sub>               |                                 | Additive         | 3/0/1         | Aq. sat. NaCl                                                | 95:5                | ~10%            |
| 135   |                         | (R)-Cat6 (40)                   | DMF                             | Additive         | 0/7/1         | Citrate buffer pH 6                                          |                     | <1%             |
| 136   |                         | (R)-Cat6 (40)                   | CH <sub>2</sub> Cl <sub>2</sub> |                  |               |                                                              | 95:5                | ~10             |
| 137   |                         | (S)-Cat6 (40)                   | CDCl <sub>3</sub>               | DMF              | Additive      | 3/1/1                                                        | Citrate buffer pH 6 | <1%             |
| 138   |                         | (R)-Cat8 (40)                   | CDCl <sub>3</sub>               | DMF              | Additive      | 3/1/1                                                        | Citrate buffer pH 6 | <1%             |
| 139   |                         | Cat11 (40)                      | CDCl <sub>3</sub>               | DMF              | Additive      | 3/1/1                                                        | Citrate buffer pH 6 | <1%             |
| 140   | Cat12 (40)              | CDCl <sub>3</sub>               | DMF                             | Additive         | 3/1/1         | Citrate buffer pH 6                                          |                     | <1%             |
| 141   |                         | Cat16 (40)                      | CDCl <sub>3</sub>               | DMF              | Additive      | 3/1/1                                                        | Citrate buffer pH 6 | 15%             |
| 142   |                         | L-Lys (40)                      | CDCl <sub>3</sub>               | DMF              | Additive      | 3/1/1                                                        | Citrate buffer pH 6 |                 |
| 143   |                         | L-Lys (40)                      | CDCl <sub>3</sub>               | Additive         | 3/0/1         | Citrate buffer pH 6                                          |                     |                 |
| 144   |                         | (R)-Cat6 (40)                   | Additiv                         |                  |               | TPGS (2%)                                                    |                     | <2%             |
| 145   |                         | (R)-Cat6 (40)                   | CH <sub>2</sub> Cl <sub>2</sub> | Additive         | 1/0/1         | TPGS (2%)                                                    | 92:8                |                 |
| 146   |                         | (R)-Cat6 (40)                   | Additiv                         |                  |               | Nok (2%)                                                     |                     | <10%            |
| 147   |                         | (R)-Cat6 (40)                   | CH <sub>2</sub> Cl <sub>2</sub> | Additive         | 1/0/1         | Nok (2%)                                                     |                     | <5%             |
| 148   |                         | (R)-Cat6 (40)                   | CH <sub>2</sub> Cl <sub>2</sub> | H <sub>2</sub> O | 5/1/0         | Drop Triton B                                                | 40:60               | ~20%            |
| 149   |                         | D-Ile (40)                      | CH <sub>2</sub> Cl <sub>2</sub> | H <sub>2</sub> O | 5/1/0         | Drop Triton B                                                | 30:70               | ~55%            |
| 150   | (R)-Cat6 (40)           | CH <sub>2</sub> Cl <sub>2</sub> | H <sub>2</sub> O                |                  | 5/1/0         | Bu <sub>4</sub> NBr (ca 1.0 mg)                              |                     | ~5%             |
| 151   |                         | D-Ile (40)                      | CH <sub>2</sub> Cl <sub>2</sub> | H <sub>2</sub> O | 5/1/0         | Bu <sub>4</sub> NBr (ca 1.0 mg)                              |                     | ~30%            |
| 152   |                         | Cat27 (30)                      | CH <sub>2</sub> Cl <sub>2</sub> | Additive         | 5/0/1         | Aq. KOH (1.0 molL <sup>-1</sup> )                            | 85:15               | ~60%            |
| 153   |                         | Cat27 (30)                      | toluene                         | Additive         | 5/0/1         | Aq. KOH (1.0 molL <sup>-1</sup> )                            | 57:43               | ~50%            |
| 154   |                         | Cat28 (20)                      | CH <sub>2</sub> Cl <sub>2</sub> | Additive         | 1/0/1         | Aq. KOH (0.1 molL <sup>-1</sup> )                            | 12:88               | ~20%            |
| 155   |                         | Cat27 (20)                      | CH <sub>2</sub> Cl <sub>2</sub> | Additive         | 1/0/1         | Aq. KOH (0.1 molL <sup>-1</sup> )                            | 78:22               | ~65%            |
| 156   |                         | Cat27 (20)                      | CH <sub>2</sub> Cl <sub>2</sub> | Additive         | 1/0/1         | Aq. KOH (0.01 molL <sup>-1</sup> )                           | 77:23               | ~65%            |
| 157   |                         | (S)-Tet (40)                    | CH <sub>2</sub> Cl <sub>2</sub> | Additive         | 1/0/1         | TPGS (2%)                                                    |                     |                 |
| 158   |                         | (R)-Tet (40)                    | CH <sub>2</sub> Cl <sub>2</sub> | Additive         | 1/0/1         | TPGS (2%)                                                    |                     | 25%             |
| 159   |                         | D-Ile (40)                      | CH <sub>2</sub> Cl <sub>2</sub> | Additive         | 1/0/1         | TPGS (2%)                                                    |                     | 25%             |
| 160   | L-Ile (40)              | CH <sub>2</sub> Cl <sub>2</sub> | H <sub>2</sub> O                |                  | 5/1           | Drop Triton B                                                | 42:58               | ~40%            |
| 161   |                         | L-Ser (40)                      | CH <sub>2</sub> Cl <sub>2</sub> | H <sub>2</sub> O | 5/1           | Drop Triton B                                                | 66:34               | ~10%            |
| 162   |                         | L-Thr (40)                      | CH <sub>2</sub> Cl <sub>2</sub> | H <sub>2</sub> O | 5/1           | Drop Triton B                                                | 33:67               | ~40%            |
| 163   |                         | D-Thr (40)                      | CH <sub>2</sub> Cl <sub>2</sub> | H <sub>2</sub> O | 5/1           | Drop Triton B                                                | 35:65               | ~45%            |
| 164   |                         | L-Phe (40)                      | CH <sub>2</sub> Cl <sub>2</sub> | H <sub>2</sub> O | 5/1           | Drop Triton B                                                | 35:65               | ~45%            |
| 165   |                         | L-Val (40)                      | CH <sub>2</sub> Cl <sub>2</sub> | H <sub>2</sub> O | 5/1           | Drop Triton B                                                | 35:65               | ~45%            |
| 166   |                         | D-Val (40)                      | CH <sub>2</sub> Cl <sub>2</sub> | H <sub>2</sub> O | 5/1           | Drop Triton B                                                | 58:42               | ~20%            |
| 167   |                         | L-Pro (40)                      | CH <sub>2</sub> Cl <sub>2</sub> | H <sub>2</sub> O | 5/1           | Drop Triton B                                                | 31:69               | ~50%            |
| 168   |                         | D-Pro (40)                      | CH <sub>2</sub> Cl <sub>2</sub> | H <sub>2</sub> O | 5/1           | Drop Triton B                                                | 34:66               | ~50%            |
| 169   |                         | (S)-Tet (40)                    | CH <sub>2</sub> Cl <sub>2</sub> | H <sub>2</sub> O | 5/1           | Drop Triton B                                                | 35:65               | ~45%            |
| 170   | (R)-Tet (40)            | CH <sub>2</sub> Cl <sub>2</sub> | H <sub>2</sub> O                |                  | 5/1           | Drop Triton B                                                | 35:65               | ~35%            |
| 171   |                         | Cat27 (20)                      | CH <sub>2</sub> Cl <sub>2</sub> | Additive         | 5/0/1         | Aq. sat. K <sub>2</sub> CO <sub>3</sub>                      | 78:22               | ~65%            |
| 172   |                         | Cat27 (20)                      | CH <sub>2</sub> Cl <sub>2</sub> | Additive         | 5/0/1         | Aq. sat. Na <sub>2</sub> CO <sub>3</sub>                     | 78:22               | ~65%            |
| 173   |                         | Cat27 (20)                      | CH <sub>2</sub> Cl <sub>2</sub> | Additive         | 5/0/1         | Aq. sat. Cs <sub>2</sub> CO <sub>3</sub>                     | 77:23               | ~65%            |
| 174   |                         | Cat27 (20)                      | CH <sub>2</sub> Cl <sub>2</sub> | Additive         | 5/0/1         | Aq. NaOH (2.0 molL <sup>-1</sup> )                           | 78:22               | ~70%            |
| 175   |                         | Cat27 (20)                      | CH <sub>2</sub> Cl <sub>2</sub> | Additive         | 5/0/1         | Aq. NaOH (0.5 molL <sup>-1</sup> )                           | 78:22               | ~65%            |
| 176   |                         | Cat27 (20)                      | CH <sub>2</sub> Cl <sub>2</sub> | Additive         | 5/0/1         | Aq. LiOH (2.0 molL <sup>-1</sup> )                           | 77:23               | ~65%            |
| 177   |                         | Cat27 (20)                      | CH <sub>2</sub> Cl <sub>2</sub> | Additive         | 5/0/1         | Aq. LiOH (0.5 molL <sup>-1</sup> )                           | 78:22               | ~65%            |
| 178   |                         | Cat27 (20)                      | CH <sub>2</sub> Cl <sub>2</sub> | Additive         | 5/0/1         | Aq. sat. NaOAc                                               | 77:23               | ~30%            |
| 179   |                         | Cat27 (20)                      | CH <sub>2</sub> Cl <sub>2</sub> | Additive         | 5/0/1         | Aq. Na <sub>2</sub> HPO <sub>4</sub> (1 molL <sup>-1</sup> ) |                     |                 |
| 180   | Cat27 (20)              | CH <sub>2</sub> Cl <sub>2</sub> |                                 |                  |               | KOH (1 eq.)                                                  | 78:22               | ~40%            |
| 181   |                         | CH <sub>2</sub> Cl <sub>2</sub> |                                 |                  |               | CsOH*H <sub>2</sub> O (1 eq.)                                | 78:22               | ~40%            |
| 182   |                         | CH <sub>2</sub> Cl <sub>2</sub> |                                 |                  |               | Cs <sub>2</sub> CO <sub>3</sub> (1 eq.)                      | 78:22               | ~35%            |
| 183   |                         | DCE                             |                                 | Additive         | 5/0/1         | Aq. NaOH (2.0 molL <sup>-1</sup> )                           | 77:23               | ~65%            |

| Entry | Catalyst (mol%)         | Solvent 1                             | Solvent 2      | Solvent 3 | Solvent Ratio | Additive                                | d.r. 14:13 | Estimated Yield |
|-------|-------------------------|---------------------------------------|----------------|-----------|---------------|-----------------------------------------|------------|-----------------|
| 184   | Cat27 (20)              | CHCl <sub>3</sub>                     |                | Additive  | 5/0/1         | Aq. NaOH (2.0 molL <sup>-1</sup> )      | 81:19      | ~65%            |
| 185   | Cat27 (20)              | benzene                               |                | Additive  | 5/0/1         | Aq. NaOH (2.0 molL <sup>-1</sup> )      | 55:45      | ~60%            |
| 186   | Cat27 (20)              | DMF                                   |                | Additive  | 5/0/1         | Aq. NaOH (2.0 molL <sup>-1</sup> )      | 35:65      | ~15%            |
| 187   | Cat27 (20)              | MeCN                                  |                | Additive  | 5/0/1         | Aq. NaOH (2.0 molL <sup>-1</sup> )      | 28:72      | ~35%            |
| 188   | Cat27 (20)              | EtOAc                                 |                | Additive  | 5/0/1         | Aq. NaOH (2.0 molL <sup>-1</sup> )      | 60:40      | ~55%            |
| 189   | Cat27 (20)              | MTBE                                  |                | Additive  | 5/0/1         | Aq. NaOH (2.0 molL <sup>-1</sup> )      | 58:42      | ~60%            |
| 190   | Cat27 (20)              | THF                                   |                | Additive  | 5/0/1         | Aq. NaOH (2.0 molL <sup>-1</sup> )      | 52:48      | ~50%            |
| 191   | Cat27 (20)              | Et <sub>2</sub> O                     |                | Additive  | 5/0/1         | Aq. NaOH (2.0 molL <sup>-1</sup> )      | 54:46      | ~60%            |
| 192   | Cat27 (20)              | Dioxane                               |                | Additive  | 5/0/1         | Aq. NaOH (2.0 molL <sup>-1</sup> )      | 11:89      | ~35%            |
| 193   | Cat27 (20)              | CH <sub>2</sub> Cl <sub>2</sub> (1/4) |                | Additive  | 1/0/1         | Aq. NaOH (2.0 molL <sup>-1</sup> )      | 76:24      | ~60%            |
| 194   | Cat27 (20) <sup>3</sup> | CH <sub>2</sub> Cl <sub>2</sub>       |                | Additive  | 5/0/1         | Aq. NaOH (2.0 molL <sup>-1</sup> )      | 80:20      | ~60%            |
| 195   | Cat29 (20) <sup>4</sup> | CH <sub>2</sub> Cl <sub>2</sub>       |                | Additive  | 5/0/1         | Aq. NaOH (2.0 molL <sup>-1</sup> )      | 64:36      | ~50%            |
| 196   | Cat27 (20) <sup>4</sup> | CH <sub>2</sub> Cl <sub>2</sub>       |                | Additive  | 20/0/1        | Aq. CsOH (2.0 molL <sup>-1</sup> )      | 86:14      | ~40%            |
| 197   | Cat27 (20) <sup>4</sup> | CH <sub>2</sub> Cl <sub>2</sub>       |                | Additive  | 20/0/1        | Aq. Sat. K <sub>2</sub> CO <sub>3</sub> | 78:22      | ~20%            |
| 198   | Cat27 (20) <sup>4</sup> | CH <sub>2</sub> Cl <sub>2</sub>       |                |           |               | KOH (5-10 eq.)                          | 86:14      | ~25%            |
| 199   | Cat27 (20) <sup>4</sup> | CH <sub>2</sub> Cl <sub>2</sub>       |                |           |               | <i>t</i> BuOK (5-10 eq.)                | 77:23      | ~55%            |
| 200   | Cat27 (20) <sup>4</sup> | CH <sub>2</sub> Cl <sub>2</sub>       |                |           |               | NaH (5-10 eq.)                          | 80:20      | ~40%            |
| 201   | Cat27 (20)              | O <sub>2</sub> N-methane              |                | Additive  | 5/0/1         | Aq. NaOH (1.0 molL <sup>-1</sup> )      | 35:65      | ~20%            |
| 202   | Cat27 (20)              | <i>p</i> -xylene                      |                | Additive  | 5/0/1         | Aq. NaOH (1.0 molL <sup>-1</sup> )      | 54:46      | ~65%            |
| 203   | Cat27 (20)              | HFIP                                  |                |           |               | KOH (ca 5 eq.)                          |            |                 |
| 204   | Cat27 (20)              | CHCl <sub>3</sub>                     | EtOH           |           | 5/1           | KOH (ca 5 eq.)                          | 56:44      | ~25%            |
| 205   | Cat27 (20)              | CHCl <sub>3</sub>                     | <i>n</i> -BuOH |           | 5/1           | KOH (ca 5 eq.)                          | 58:42      | ~40%            |
| 206   | Cat27 (20)              | CHCl <sub>3</sub>                     |                | Additive  | 5/0/1         | Aq. NH <sub>4</sub> OH (25%)            | 82:18      | ~75%            |
| 207   | Cat27 (20) <sup>4</sup> | CH <sub>2</sub> Cl <sub>2</sub>       |                |           |               | CsOH·H <sub>2</sub> O (2.0 mg)          | 79:21      | ~30%            |
| 208   | Cat27 (40) <sup>4</sup> | CH <sub>2</sub> Cl <sub>2</sub>       |                |           |               | CsOH·H <sub>2</sub> O (2.0 mg)          | 86:14      | ~20%            |
| 209   | Cat27 (40) <sup>4</sup> | CH <sub>2</sub> Cl <sub>2</sub>       |                | Additive  | 100/0/1       | Aq. CsOH (2.0 molL <sup>-1</sup> )      | 87:13      | ~25%            |
| 210   | Cat27 (20) <sup>4</sup> | CH <sub>2</sub> Cl <sub>2</sub>       |                |           |               | CsOH·H <sub>2</sub> O (2.0 mg)          | 79:21      | ~20%            |
| 211   | Cat27 (20) <sup>4</sup> | CH <sub>2</sub> Cl <sub>2</sub>       |                |           |               | Drop Et <sub>3</sub> N                  |            | <1%             |
| 212   | Cat27 (20) <sup>4</sup> | CH <sub>2</sub> Cl <sub>2</sub>       |                |           |               | Drop Pyridine                           |            | <1%             |
| 213   | Cat27 (20) <sup>4</sup> | CH <sub>2</sub> Cl <sub>2</sub>       |                |           |               | Drop DBU                                | 85:15      | ~10%            |
| 214   | Cat27 (20) <sup>4</sup> | CH <sub>2</sub> Cl <sub>2</sub>       |                |           |               | Drop DABCO                              |            | <1%             |
| 215   |                         | THF                                   |                |           |               | KOH (10 eq.)                            | 30:70      |                 |
| 216   |                         | toluene                               |                |           |               | KOH (10 eq.)                            | 27:73      |                 |

<sup>1</sup> -30 °C; <sup>2</sup> 60 °C; <sup>3</sup> 0 °C; <sup>4</sup> -78 °C.

### Examination of catalysts and conditions for (*R*<sub>a</sub>,*S*<sub>a</sub>,*S*<sub>a</sub>,*S*<sub>a</sub>)-15 and (*S*<sub>a</sub>,*S*<sub>a</sub>,*S*<sub>a</sub>,*S*<sub>a</sub>)-16

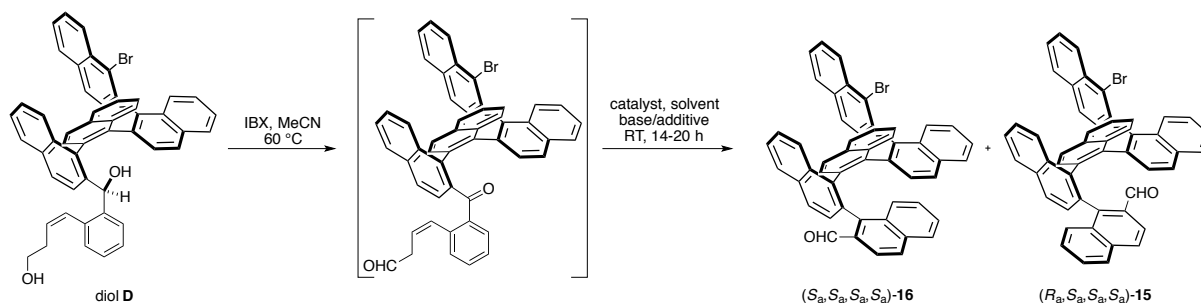

| Entry | Catalyst (mol%)         | Solvent 1                       | Solvent 2          | Solvent 3          | Solvent Ratio | Base/Additive                     | d.r. 16:15 | Estimated Yield |
|-------|-------------------------|---------------------------------|--------------------|--------------------|---------------|-----------------------------------|------------|-----------------|
| 1     | ( <i>S</i> )-Tet (40)   | CHCl <sub>3</sub>               | DMF                | Citrate buffer pH5 | 3:1:1         |                                   |            |                 |
| 2     | ( <i>R</i> )-Tet (40)   | CHCl <sub>3</sub>               | DMF                | Citrate buffer pH5 | 3:1:1         |                                   |            | <5%             |
| 3     |                         | CH <sub>2</sub> Cl <sub>2</sub> | H <sub>2</sub> O   |                    | 4:1           | BnNMe <sub>3</sub> Cl (0.4 eq.)   |            |                 |
| 4     | ( <i>S</i> )-Tet (40)   | CH <sub>2</sub> Cl <sub>2</sub> | H <sub>2</sub> O   |                    | 4:1           | BnNMe <sub>3</sub> Cl (0.4 eq.)   |            |                 |
| 5     | ( <i>R</i> )-Tet (40)   | CH <sub>2</sub> Cl <sub>2</sub> | H <sub>2</sub> O   |                    | 4:1           | BnNMe <sub>3</sub> Cl (0.4 eq.)   |            |                 |
| 6     | L-Ile (40)              | CH <sub>2</sub> Cl <sub>2</sub> | H <sub>2</sub> O   |                    | 4:1           | BnNMe <sub>3</sub> Cl (0.4 eq.)   |            |                 |
| 7     | D-Ile (40)              | CH <sub>2</sub> Cl <sub>2</sub> | H <sub>2</sub> O   |                    | 4:1           | BnNMe <sub>3</sub> Cl (0.4 eq.)   |            |                 |
| 8     |                         | CH <sub>2</sub> Cl <sub>2</sub> |                    |                    |               | Triton B (0.4 eq.)                | <5:95      | ~50%            |
| 9     | ( <i>S</i> )-Tet (40)   | CH <sub>2</sub> Cl <sub>2</sub> |                    |                    |               | Triton B (0.4 eq.)                | <5:95      | ~50%            |
| 10    | ( <i>R</i> )-Tet (40)   | CH <sub>2</sub> Cl <sub>2</sub> |                    |                    |               | Triton B (0.4 eq.)                | <5:95      | ~50%            |
| 11    | L-Ile (40)              | DMF                             | Citrate buffer pH5 |                    | 2:1           |                                   |            |                 |
| 12    | D-Ile (40)              | DMF                             | Citrate buffer pH5 |                    | 2:1           |                                   |            |                 |
| 13    | L-Pro (40)              | DMF                             | Citrate buffer pH5 |                    | 2:1           |                                   |            |                 |
| 14    | D-Pro (40)              | DMF                             | Citrate buffer pH5 |                    | 2:1           |                                   |            |                 |
| 15    | ( <i>S</i> )-Cat8 (40)  | CHCl <sub>3</sub>               | DMF                | Citrate buffer pH5 | 3:1:1         |                                   |            |                 |
| 16    | ( <i>R</i> )-Cat8 (40)  | CHCl <sub>3</sub>               | DMF                | Citrate buffer pH5 | 3:1:1         |                                   |            |                 |
| 17    | ( <i>S</i> )-Cat12 (40) | CHCl <sub>3</sub>               | DMF                | Citrate buffer pH5 | 3:1:1         |                                   |            | <5%             |
| 18    | ( <i>R</i> )-Cat12 (40) | CHCl <sub>3</sub>               | DMF                | Citrate buffer pH5 | 3:1:1         |                                   |            |                 |
| 19    |                         | CHCl <sub>3</sub>               | H <sub>2</sub> O   |                    | 4:1           | Aq. KOH (1.0 molL <sup>-1</sup> ) | 1:99       | ~35%            |
| 20    | Cat27 (20)              | CHCl <sub>3</sub>               | H <sub>2</sub> O   |                    | 4:1           | Aq. KOH (1.0 molL <sup>-1</sup> ) | 28:72      | ~35%            |
| 21    |                         | CHCl <sub>3</sub>               |                    |                    |               | Barton's base                     | 26:74      | ~10%            |
| 22    | Cat27 (20)              | CHCl <sub>3</sub>               | H <sub>2</sub> O   |                    | 4:1           | Aq. KOH (1.0 molL <sup>-1</sup> ) | 30:70      | ~35%            |

| Entry | Catalyst (mol%)         | Solvent 1                       | Solvent 2          | Solvent 3 | Solvent Ratio | Additive/Base                                                 | d.r. 16:15 | Estimated Yield |
|-------|-------------------------|---------------------------------|--------------------|-----------|---------------|---------------------------------------------------------------|------------|-----------------|
| 23    | Cat36 (20)              | CHCl <sub>3</sub>               | H <sub>2</sub> O   |           | 4:1           | Aq. KOH (1.0 molL <sup>-1</sup> )                             | 54:46      | <5%             |
| 24    | Cat40 (20)              | CHCl <sub>3</sub>               | H <sub>2</sub> O   |           | 4:1           | Aq. KOH (1.0 molL <sup>-1</sup> )                             | 25:75      | ~35%            |
| 25    | Cat42 (20)              | CHCl <sub>3</sub>               | H <sub>2</sub> O   |           | 4:1           | Aq. KOH (1.0 molL <sup>-1</sup> )                             | 45:55      | ~20%            |
| 26    | Cat43 (20)              | CHCl <sub>3</sub>               | H <sub>2</sub> O   |           | 4:1           | Aq. KOH (1.0 molL <sup>-1</sup> )                             | 7:93       | ~35%            |
| 27    | Cat44 (20)              | CHCl <sub>3</sub>               | H <sub>2</sub> O   |           | 4:1           | Aq. KOH (1.0 molL <sup>-1</sup> )                             | 5:95       | ~40%            |
| 28    | Cat29 (20)              | CHCl <sub>3</sub>               | H <sub>2</sub> O   |           | 4:1           | Aq. KOH (1.0 molL <sup>-1</sup> )                             | 30:70      | <10%            |
| 29    | Cat31 (20)              | CHCl <sub>3</sub>               | H <sub>2</sub> O   |           | 4:1           | Aq. KOH (1.0 molL <sup>-1</sup> )                             | 3:97       | ~45%            |
| 30    | Cat27 (20)              | CHCl <sub>3</sub>               |                    |           |               | NaOH (ca 2.0 mg)                                              | 52:48      | ~30%            |
| 31    | Cat27 (20)              | CHCl <sub>3</sub>               | H <sub>2</sub> O   |           | 4:1           | Aq. Na <sub>2</sub> CO <sub>3</sub> (0.1 molL <sup>-1</sup> ) | 27:73      | ~30%            |
| 32    | Cat27 (20)              | CHCl <sub>3</sub>               | H <sub>2</sub> O   |           | 4:1           | NaOAc (sat.)                                                  |            |                 |
| 33    | Cat27 (20)              | CHCl <sub>3</sub>               | H <sub>2</sub> O   |           | 4:1           | NH <sub>4</sub> OH (25%)                                      | 17:83      | ~50%            |
| 34    |                         | CHCl <sub>3</sub>               | H <sub>2</sub> O   |           | 4:1           | NH <sub>4</sub> OH (25%)                                      |            |                 |
| 35    | Cat42 (20) <sup>1</sup> | CHCl <sub>3</sub>               |                    |           |               | NaOH (ca 2.0 mg)                                              |            | <5%             |
| 36    | Cat27 (40) <sup>1</sup> | CHCl <sub>3</sub>               |                    |           |               | NaOH (ca 2.0 mg)                                              | 38:62      | ~10%            |
| 37    | Cat27 (20) <sup>1</sup> | CHCl <sub>3</sub>               |                    |           |               | NaOH (ca 2.0 mg)                                              | 34:66      | ~5%             |
| 38    | Cat27 (20) <sup>1</sup> | CHCl <sub>3</sub>               |                    |           |               | K <sub>2</sub> CO <sub>3</sub> (ca 2.0 mg)                    | 13:87      | ~15%            |
| 39    | Cat27 (20) <sup>1</sup> | toluene                         |                    |           |               | NaOH (ca 2.0 mg)                                              | 20:80      | ~10%            |
| 40    | Cat27 (20) <sup>1</sup> | MeCN                            |                    |           |               | NaOH (ca 2.0 mg)                                              | 7:93       | ~10%            |
| 41    | Cat27 (20) <sup>1</sup> | EtOAc                           |                    |           |               | NaOH (ca 2.0 mg)                                              | 1:99       | ~5%             |
| 42    | Cat27 (20) <sup>1</sup> | THF                             |                    |           |               | NaOH (ca 2.0 mg)                                              |            | <5%             |
| 43    | Cat27 (20) <sup>1</sup> | THF                             | <i>t</i> BuOH      |           | 4:1           | NaOH (ca 2.0 mg)                                              | 1:99       | ~10%            |
| 44    | Cat27 (20)              | CH <sub>2</sub> Cl <sub>2</sub> |                    |           |               | Triton B (0.4 eq.)                                            | <5:95      | ~35%            |
| 45    | Cat27 (20) <sup>2</sup> | CH <sub>2</sub> Cl <sub>2</sub> |                    |           |               | Triton B (0.1 eq.)                                            |            |                 |
| 46    | Cat27 (20) <sup>2</sup> | CH <sub>2</sub> Cl <sub>2</sub> |                    |           |               | Triton B (0.01 eq.)                                           |            |                 |
| 47    | Cat27 (20)              | CH <sub>2</sub> Cl <sub>2</sub> | H <sub>2</sub> O   |           | 5:1           | Triton B (0.1 eq.)                                            | 11:89      | ~20%            |
| 48    | Cat28 (20)              | CH <sub>2</sub> Cl <sub>2</sub> | H <sub>2</sub> O   |           | 5:1           | Aq. KOH (1.0 molL <sup>-1</sup> )                             |            | <5%             |
| 49    | Cat30 (20)              | CH <sub>2</sub> Cl <sub>2</sub> | H <sub>2</sub> O   |           | 5:1           | Aq. KOH (1.0 molL <sup>-1</sup> )                             |            | <5%             |
| 50    | Cat32 (20)              | CH <sub>2</sub> Cl <sub>2</sub> | H <sub>2</sub> O   |           | 5:1           | Aq. KOH (1.0 molL <sup>-1</sup> )                             | <5:95      | ~40%            |
| 51    | Cat33 (20)              | CH <sub>2</sub> Cl <sub>2</sub> | H <sub>2</sub> O   |           | 5:1           | Aq. KOH (1.0 molL <sup>-1</sup> )                             |            | <5%             |
| 52    | Cat34 (20)              | CH <sub>2</sub> Cl <sub>2</sub> | H <sub>2</sub> O   |           | 5:1           | Aq. KOH (1.0 molL <sup>-1</sup> )                             |            | <5%             |
| 53    | Cat35 (20)              | CH <sub>2</sub> Cl <sub>2</sub> | H <sub>2</sub> O   |           | 5:1           | Aq. KOH (1.0 molL <sup>-1</sup> )                             | 20:80      | ~20%            |
| 54    | Cat37 (20)              | CH <sub>2</sub> Cl <sub>2</sub> | H <sub>2</sub> O   |           | 5:1           | Aq. KOH (1.0 molL <sup>-1</sup> )                             |            | <5%             |
| 55    | Cat38 (20)              | CH <sub>2</sub> Cl <sub>2</sub> | H <sub>2</sub> O   |           | 5:1           | Aq. KOH (1.0 molL <sup>-1</sup> )                             |            | <5%             |
| 56    | Cat39 (20)              | CH <sub>2</sub> Cl <sub>2</sub> | H <sub>2</sub> O   |           | 5:1           | Aq. KOH (1.0 molL <sup>-1</sup> )                             |            | <5%             |
| 57    | Cat41 (20)              | CH <sub>2</sub> Cl <sub>2</sub> | H <sub>2</sub> O   |           | 5:1           | Aq. KOH (1.0 molL <sup>-1</sup> )                             |            | <5%             |
| 58    | Cat27 (20)              | CHCl <sub>3</sub>               |                    |           |               | Ca(OH) <sub>2</sub> (ca 2.0 mg)                               |            | <5%             |
| 59    | Cat27 (20)              | CHCl <sub>3</sub>               |                    |           |               | Mg(OH) <sub>2</sub> (ca 2.0 mg)                               |            | <5%             |
| 60    | Cat27 (20)              | CHCl <sub>3</sub>               |                    |           |               | CaCO <sub>3</sub> (ca 2.0 mg)                                 |            |                 |
| 61    | Cat27 (20)              | CHCl <sub>3</sub>               |                    |           |               | KOtBu (ca 2.0 mg)                                             | 55:45      | ~40%            |
| 62    | Cat27 (20)              | CHCl <sub>3</sub>               |                    |           |               | NaH (ca 2.0 mg)                                               | 57:45      | ~40%            |
| 63    | Cat27 (20)              | CHCl <sub>3</sub>               |                    |           |               | LiHMDS (ca 2.0 mg)                                            |            |                 |
| 64    | Cat27 (20)              | CHCl <sub>3</sub>               |                    |           |               | Drop NEt <sub>3</sub>                                         |            |                 |
| 65    | Cat27 (20)              | CHCl <sub>3</sub>               |                    |           |               | Drop pyridine                                                 |            |                 |
| 66    | Cat27 (20)              | CHCl <sub>3</sub>               |                    |           |               | Drop Barton's base                                            |            |                 |
| 67    | Cat27 (20)              | CHCl <sub>3</sub>               |                    |           |               | Drop DABCO                                                    |            |                 |
| 68    | Cat27 (20)              | CHCl <sub>3</sub>               | MeOH               |           | 5:1           | Aq. KOH (0.2 molL <sup>-1</sup> )                             | <5:95      | ~15%            |
| 69    | Cat27 (20)              | CHCl <sub>3</sub>               | EtOH               |           | 5:1           | Aq. KOH (0.2 molL <sup>-1</sup> )                             | <5:95      | ~5%             |
| 70    | Cat27 (20)              | MTBE                            | H <sub>2</sub> O   |           | 5:1           | Aq. KOH (1.0 molL <sup>-1</sup> )                             | 9:91       | ~50%            |
| 71    | Cat27 (20)              | MeNO <sub>2</sub>               | H <sub>2</sub> O   |           | 5:1           | Aq. KOH (1.0 molL <sup>-1</sup> )                             |            |                 |
| 72    | Cat27 (20)              | DMF                             | H <sub>2</sub> O   |           | 5:1           | Aq. KOH (1.0 molL <sup>-1</sup> )                             | 12:88      | ~15%            |
| 73    | Cat27 (20)              | CHCl <sub>3</sub>               | Citrate buffer pH5 |           | 5:1           | KOH (ca 2.0 mg)                                               | 28:72      | ~40-45%         |
| 74    | Cat27 (20) <sup>1</sup> | CHCl <sub>3</sub>               |                    |           |               | NaH (1 eq.)                                                   |            | <5%             |
| 75    | Cat27 (20) <sup>1</sup> | CHCl <sub>3</sub>               |                    |           |               | NaH (10 eq.)                                                  | 28:72      | ~15%            |
| 76    | <sup>1</sup>            | CHCl <sub>3</sub>               |                    |           |               | NaH (10 eq.)                                                  |            | <5%             |
| 77    | Cat27 (20) <sup>1</sup> | CHCl <sub>3</sub>               |                    |           |               | KOtBu (1 eq.)                                                 |            | <5%             |
| 78    | Cat27 (20) <sup>1</sup> | CHCl <sub>3</sub>               |                    |           |               | KOtBu (10 eq.)                                                |            | <5%             |
| 79    | <sup>1</sup>            | CHCl <sub>3</sub>               |                    |           |               | KOtBu (10 eq.)                                                | <5:95      | ~5%             |
| 80    | Cat42 (20) <sup>1</sup> | CHCl <sub>3</sub>               |                    |           |               | NaH (10 eq.)                                                  | 50:50      | ~10%            |
| 81    | Cat42 (20) <sup>1</sup> | CHCl <sub>3</sub>               |                    |           |               | KOtBu (10 eq.)                                                |            | <5%             |
| 82    | Cat27 (20) <sup>1</sup> | CHCl <sub>3</sub>               | H <sub>2</sub> O   |           | 100:1         | NaH (10 eq.)                                                  |            | <5%             |
| 83    | Cat27 (20) <sup>1</sup> | CHCl <sub>3</sub>               | H <sub>2</sub> O   |           | 100:1         | KOtBu (10 eq.)                                                |            |                 |
| 84    | Cat27 (20)              | CHCl <sub>3</sub>               |                    |           |               | NaH (1 eq.)                                                   | 60:40      | ~35%            |
| 85    | Cat27 (20)              | CHCl <sub>3</sub>               |                    |           |               | NaH (10 eq.)                                                  | 62:38      | ~35%            |
| 86    |                         | CHCl <sub>3</sub>               |                    |           |               | NaH (10 eq.)                                                  | 28:72      | ~35%            |
| 87    | Cat27 (20)              | CHCl <sub>3</sub>               |                    |           |               | KOtBu (1 eq.)                                                 | 57:43      | ~30%            |
| 88    | Cat27 (20)              | CHCl <sub>3</sub>               |                    |           |               | KOtBu (10 eq.)                                                | 57:43      | ~30%            |
| 89    |                         | CHCl <sub>3</sub>               |                    |           |               | KOtBu (10 eq.)                                                | 23:77      | ~40%            |
| 90    | Cat42 (20)              | CHCl <sub>3</sub>               |                    |           |               | NaH (10 eq.)                                                  | 83:17      | ~25%            |
| 91    | Cat42 (20)              | CHCl <sub>3</sub>               |                    |           |               | KOtBu (10 eq.)                                                | 77:23      | ~20%            |
| 92    | Cat27 (20)              | CHCl <sub>3</sub>               | H <sub>2</sub> O   |           | 100:1         | NaH (10 eq.)                                                  | 60:40      | ~35%            |
| 93    | Cat27 (20)              | CHCl <sub>3</sub>               | H <sub>2</sub> O   |           | 100:1         | KOtBu (10 eq.)                                                | 55:45      | ~35%            |

<sup>1</sup> -40 °C; <sup>2</sup> -78 °C.

## HPLC Data

(*S<sub>a</sub>*)-(1'-bromo-[1,2'-binaphthalen]-2-yl)methanol (Chiralcel OD-H column [1.0 mLmin<sup>-1</sup>, *i*-PrOH/*n*-heptane 10:90])

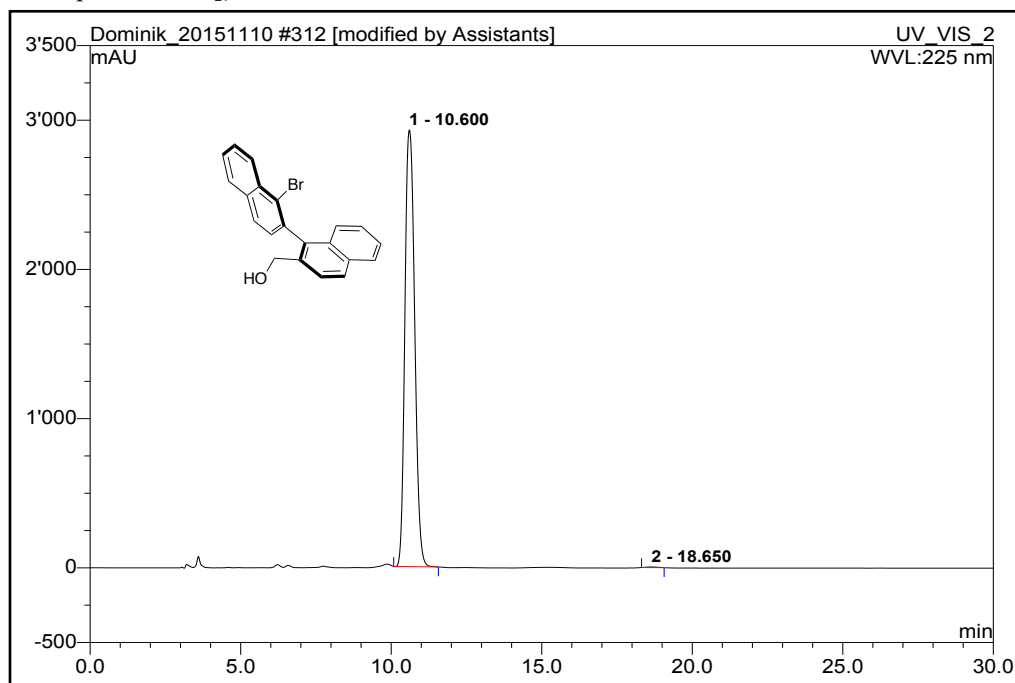

| No.    | Ret.Time (min) | Height (mAU) | Area (mAU*min) | Rel.Area (%) | Type |
|--------|----------------|--------------|----------------|--------------|------|
| 1      | 10.60          | 2926.863     | 1102.245       | 99.83        | BMB* |
| 2      | 18.65          | 4.217        | 1.883          | 0.17         | BMB* |
| Total: |                | 2931.079     | 1104.128       | 100.00       |      |

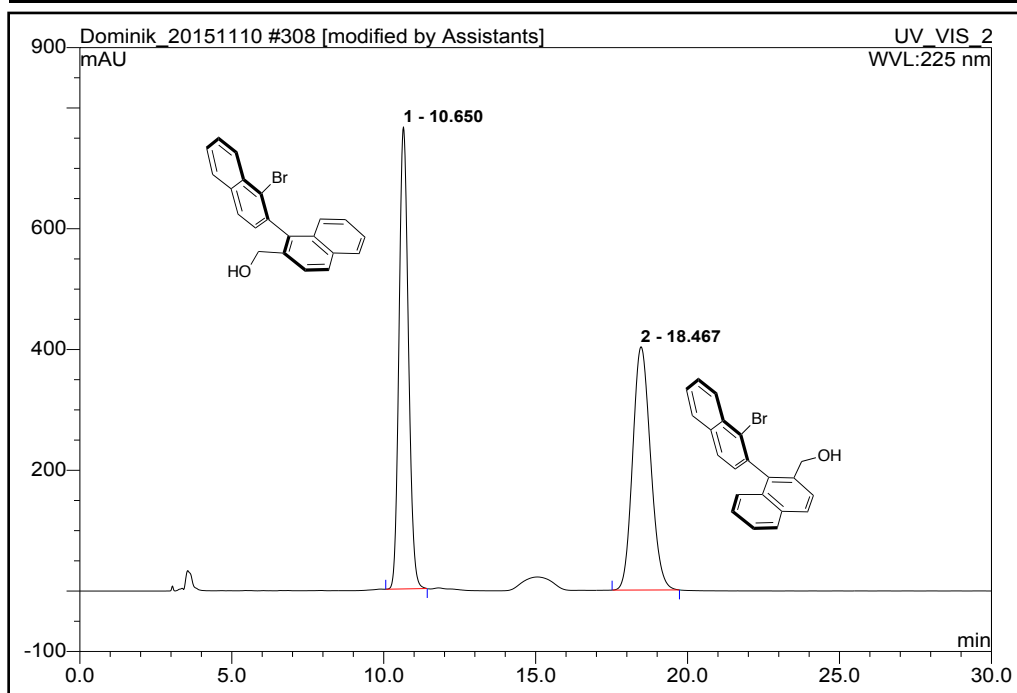

| No.    | Ret.Time (min) | Height (mAU) | Area (mAU*min) | Rel.Area (%) | Type |
|--------|----------------|--------------|----------------|--------------|------|
| 1      | 10.65          | 765.211      | 274.711        | 49.95        | BMB* |
| 2      | 18.47          | 402.948      | 275.238        | 50.05        | BMB* |
| Total: |                | 1168.159     | 549.949        | 100.00       |      |

**(S<sub>a</sub>)-1'-(4-(bis(4-methoxyphenyl)amino)phenyl)-[1,2'-binaphthalene]-2-carbaldehyde** (Chiralcel AD-H column [1.0 mLmin<sup>-1</sup>, *i*-PrOH/*n*-heptane 10:90])

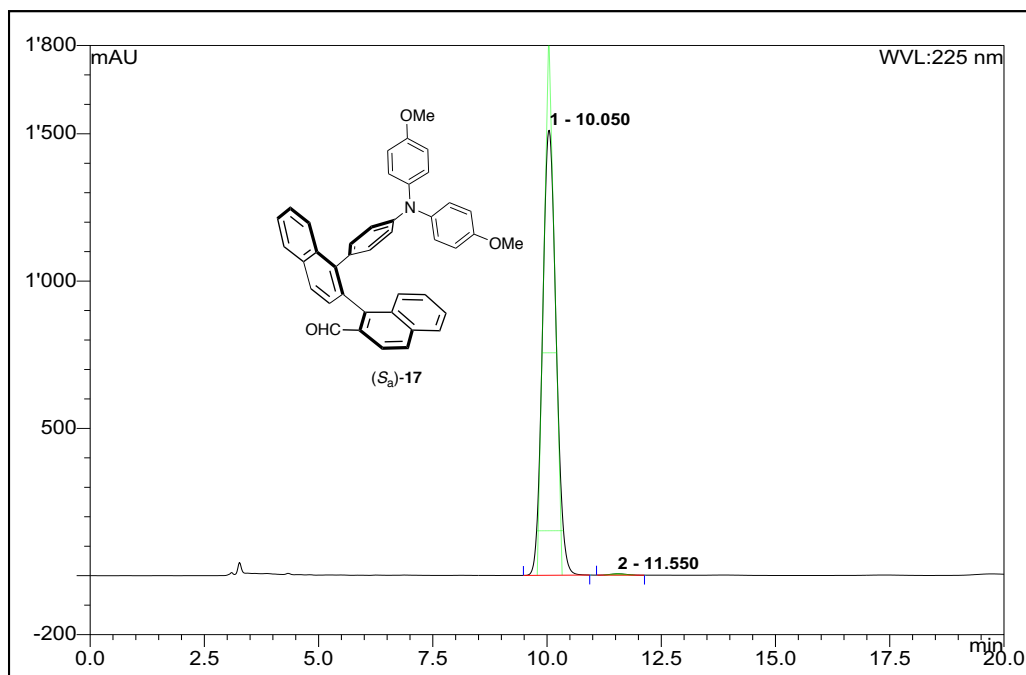

| No.    | Ret.Time (min) | Height (mAU) | Area (mAU*min) | Rel.Area (%) | Type |
|--------|----------------|--------------|----------------|--------------|------|
| 1      | 10.05          | 1510.616     | 520.966        | 99.65        | BMB* |
| 2      | 11.55          | 4.568        | 1.844          | 0.35         | BMB* |
| Total: |                | 1515.185     | 522.81         | 100.00       |      |

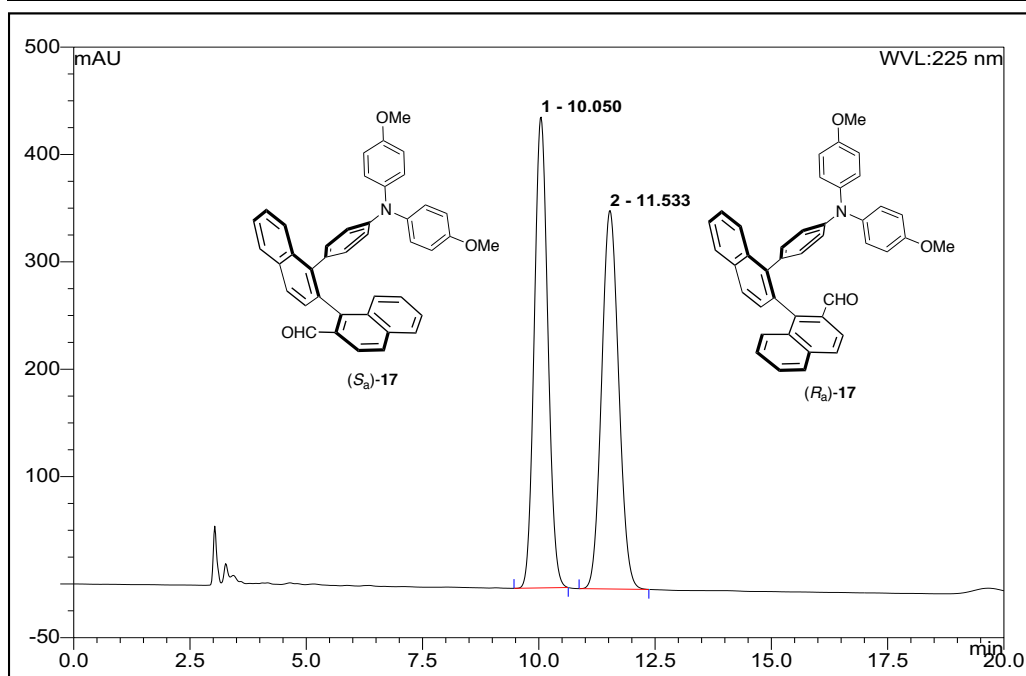

| No.    | Ret.Time (min) | Height (mAU) | Area (mAU*min) | Rel.Area (%) | Type |
|--------|----------------|--------------|----------------|--------------|------|
| 1      | 10.05          | 438.531      | 148.692        | 49.80        | BMB* |
| 2      | 11.53          | 352.468      | 149.905        | 50.20        | BMB* |
| Total: |                | 790.999      | 298.597        | 100.00       |      |

## X-ray Crystallographic Analysis (Dr. Markus Neuburger)

### X-ray of (*R<sub>a</sub>*,*S<sub>a</sub>*)-7 (CCDC 1584599)

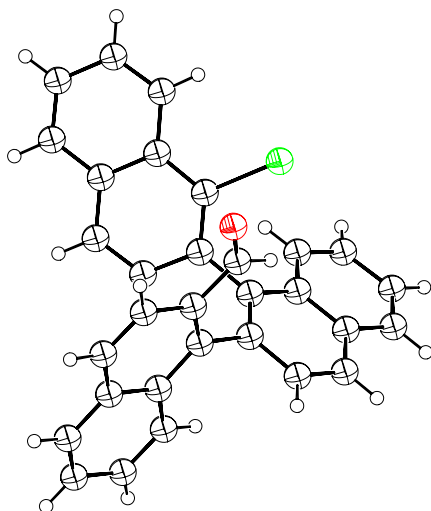

The crystal was measured on a *Bruker Kappa Apex2* diffractometer at 123K using graphite-monochromated Cu *K<sub>α</sub>*-radiation with  $\lambda = 1.54178 \text{ \AA}$ ,  $\Theta_{\text{max}} = 68.976^\circ$ . Minimal/maximal transmission 0.78/0.90,  $\mu = 2.697 \text{ mm}^{-1}$ . The Apex2 suite has been used for datacollection and integration. From a total of 28773 reflections, 4085 were independent (merging  $r = 0.030$ ). From these, 4040 were considered as observed ( $I > 2.0\sigma(I)$ ) and were used to refine 299 parameters. The structure was solved by Other methods using the program Superflip. Least-squares refinement against *F* was carried out on all non-hydrogen atoms using the program CRYSTALS.  $R = 0.0167$  (observed data),  $wR = 0.0186$  (all data),  $\text{GOF} = 1.0888$ . Minimal/maximal residual electron density =  $-0.18/0.20 \text{ e \AA}^{-3}$ . Chebychev polynomial weights were used to complete the refinement.

|                                          |                                                                                                                                                                 |
|------------------------------------------|-----------------------------------------------------------------------------------------------------------------------------------------------------------------|
| <b>Chemical formula</b>                  | C <sub>31</sub> H <sub>19</sub> BrO                                                                                                                             |
| <b>Formula weight</b>                    | 487.39                                                                                                                                                          |
| <b>Z</b>                                 | 4                                                                                                                                                               |
| <b>D<sub>calc.</sub></b>                 | 1.465 Mg · m <sup>-3</sup>                                                                                                                                      |
| <b>F(000)</b>                            | 992                                                                                                                                                             |
| <b>Crystal description</b>               | colourless block                                                                                                                                                |
| <b>Crystal size</b>                      | 0.040 · 0.090 · 0.190 mm <sup>3</sup>                                                                                                                           |
| <b>Absorption coefficient</b>            | 2.697 mm <sup>-1</sup>                                                                                                                                          |
| <b>min/max transmission</b>              | 0.78 / 0.90                                                                                                                                                     |
| <b>Temperature</b>                       | 123K                                                                                                                                                            |
| <b>Radiation (wavelength)</b>            | Cu <i>K<sub>α</sub></i> ( $\lambda = 1.54178 \text{ \AA}$ )                                                                                                     |
| <b>Crystal system</b>                    | orthorhombic                                                                                                                                                    |
| <b>Space group</b>                       | P 2 <sub>1</sub> 2 <sub>1</sub> 2 <sub>1</sub>                                                                                                                  |
| <b>Unit cell dimensions</b>              | $a = 7.9226(9) \text{ \AA}$<br>$b = 15.7270(18) \text{ \AA}$<br>$c = 17.738(2) \text{ \AA}$<br>$\alpha = 90^\circ$<br>$\beta = 90^\circ$<br>$\gamma = 90^\circ$ |
| <b>Volume</b>                            | 2210.1(4) Å <sup>3</sup>                                                                                                                                        |
| <b>min/max <math>\Theta</math></b>       | 3.756° / 68.976°                                                                                                                                                |
| <b>Number of collected reflections</b>   | 28773                                                                                                                                                           |
| <b>Number of independent reflections</b> | 4085 (merging $r = 0.030$ )                                                                                                                                     |
| <b>Number of observed reflections</b>    | 4040 ( $I > 2.0\sigma(I)$ )                                                                                                                                     |
| <b>Number of refined parameters</b>      | 299                                                                                                                                                             |
| <b>R</b>                                 | 0.0167                                                                                                                                                          |
| <b>wR</b>                                | 0.0186                                                                                                                                                          |
| <b>Goodness of fit</b>                   | 1.0888                                                                                                                                                          |
| <b>Flack</b>                             | 0.004(8)                                                                                                                                                        |

### X-ray of (R<sub>a</sub>,S<sub>a</sub>,S<sub>a</sub>,S<sub>a</sub>)-15 (CCDC 1584600)

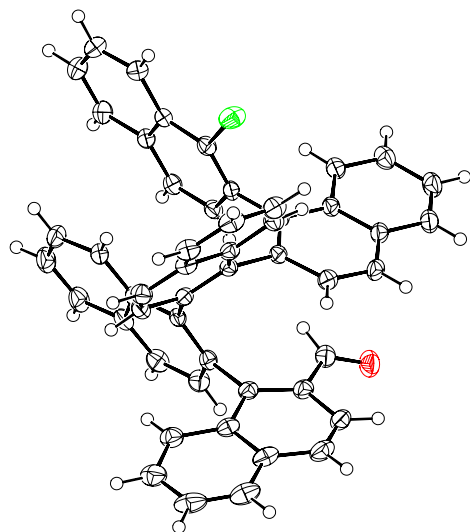

The crystal was measured on a *Stoe StadiVari* diffractometer at 123K using graded multilayer mirror-monochromated Ga  $K_{\alpha}$ -radiation with  $\lambda = 1.34143 \text{ \AA}$ ,  $\Theta_{\max} = 59.457^{\circ}$ . Minimal/maximal transmission 0.79/0.82,  $\mu = 3.330 \text{ mm}^{-1}$ . The STOE X-AREA suite has been used for datacollection and integration. From a total of 55626 reflections, 9450 were independent (merging  $r = 0.030$ ). From these, 8792 were considered as observed ( $I > 2.0\sigma(I)$ ) and were used to refine 551 parameters. The structure was solved by Other methods using the program Superflip. Least-squares refinement against F was carried out on all non-hydrogen atoms using the program CRYSTALS.  $R = 0.0360$  (observed data),  $wR = 0.0425$  (all data),  $\text{GOF} = 1.0558$ . Minimal/maximal residual electron density =  $-0.66/1.11 \text{ e \AA}^{-3}$ . Chebychev polynomial weights were used to complete the refinement.

|                                          |                                                                                                                                                                         |
|------------------------------------------|-------------------------------------------------------------------------------------------------------------------------------------------------------------------------|
| <b>Chemical formula</b>                  | $\text{C}_{51}\text{H}_{31}\text{BrO} \cdot 2 \text{CHCl}_3$                                                                                                            |
| <b>Formula weight</b>                    | 978.47                                                                                                                                                                  |
| <b>Z</b>                                 | 4                                                                                                                                                                       |
| <b>D<sub>calc.</sub></b>                 | $1.501 \text{ Mg} \cdot \text{m}^{-3}$                                                                                                                                  |
| <b>F(000)</b>                            | 1984                                                                                                                                                                    |
| <b>Crystal description</b>               | colourless needle                                                                                                                                                       |
| <b>Crystal size</b>                      | $0.060 \cdot 0.070 \cdot 0.180 \text{ mm}^3$                                                                                                                            |
| <b>Absorption coefficient</b>            | $3.330 \text{ mm}^{-1}$                                                                                                                                                 |
| <b>min/max transmission</b>              | 0.79 / 0.82                                                                                                                                                             |
| <b>Temperature</b>                       | 123K                                                                                                                                                                    |
| <b>Radiation (wavelength)</b>            | Ga $K_{\alpha}$ ( $\lambda = 1.34143 \text{ \AA}$ )                                                                                                                     |
| <b>Crystal system</b>                    | orthorhombic                                                                                                                                                            |
| <b>Space group</b>                       | $P 2_1 2_1 2$                                                                                                                                                           |
| <b>Unit cell dimensions</b>              | $a = 21.3901(3) \text{ \AA}$<br>$b = 20.8054(3) \text{ \AA}$<br>$c = 9.73190(10) \text{ \AA}$<br>$\alpha = 90^{\circ}$<br>$\beta = 90^{\circ}$<br>$\gamma = 90^{\circ}$ |
| <b>Volume</b>                            | $4330.98(10) \text{ \AA}^3$                                                                                                                                             |
| <b>min/max <math>\Theta</math></b>       | $2.578^{\circ} / 59.457^{\circ}$                                                                                                                                        |
| <b>Number of collected reflections</b>   | 55626                                                                                                                                                                   |
| <b>Number of independent reflections</b> | 9450 (merging $r = 0.030$ )                                                                                                                                             |
| <b>Number of observed reflections</b>    | 8792 ( $I > 2.0\sigma(I)$ )                                                                                                                                             |
| <b>Number of refined parameters</b>      | 551                                                                                                                                                                     |
| <b>R</b>                                 | 0.0360                                                                                                                                                                  |
| <b>wR</b>                                | 0.0425                                                                                                                                                                  |
| <b>Goodness of fit</b>                   | 1.0558                                                                                                                                                                  |
| <b>Flack</b>                             | $-0.005(12)$                                                                                                                                                            |

## NMR Data

2,  $^1\text{H}$  NMR (400 MHz,  $\text{CDCl}_3$ ):

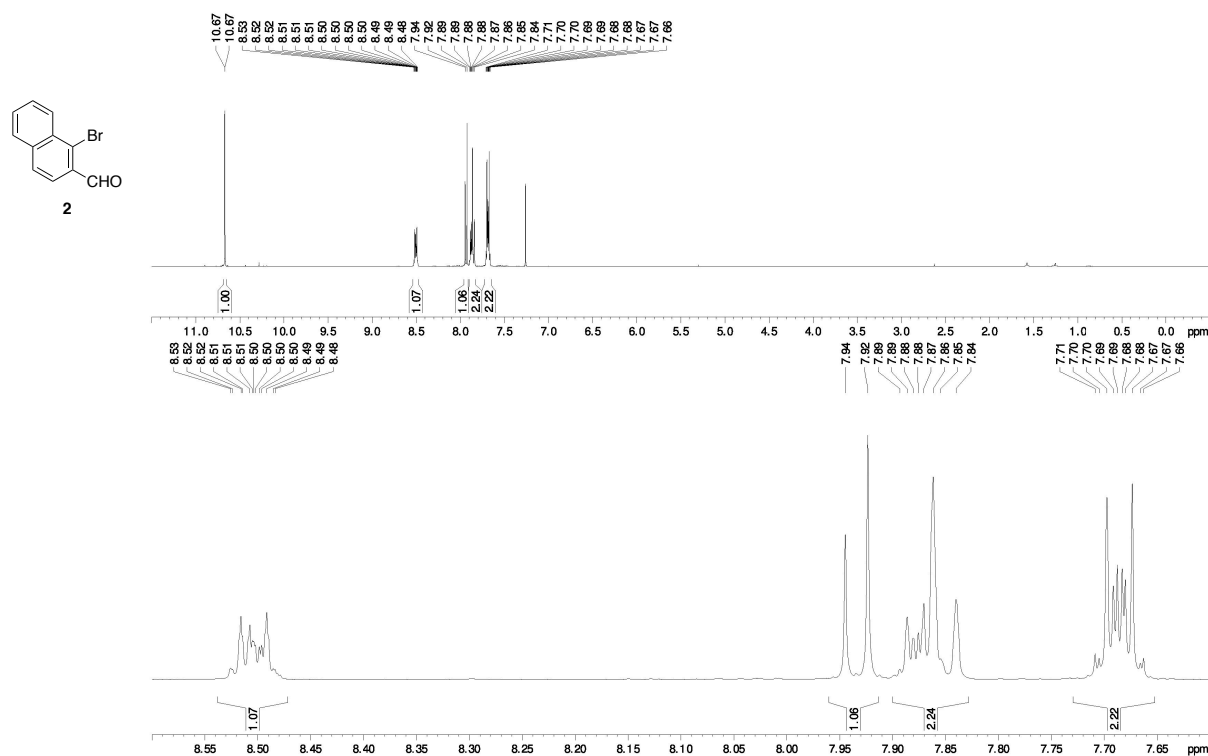

2,  $^{13}\text{C}$  NMR (126 MHz,  $\text{CDCl}_3$ ):

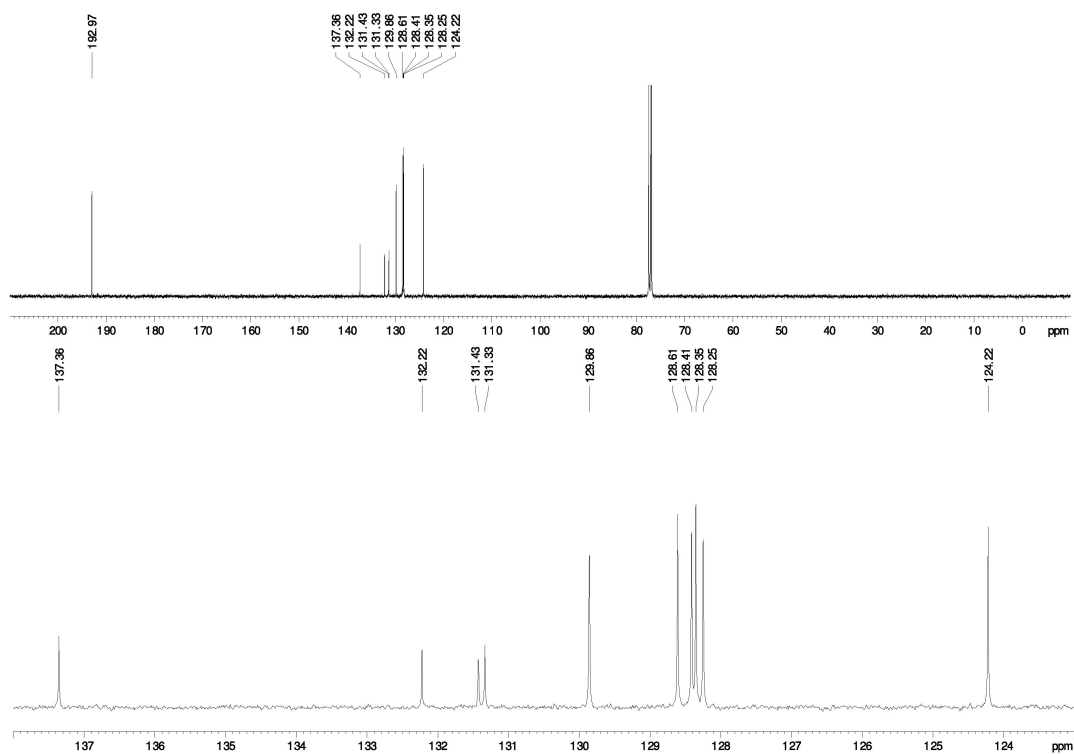

**3**,  $^1\text{H}$  NMR (500 MHz,  $\text{CDCl}_3$ ):

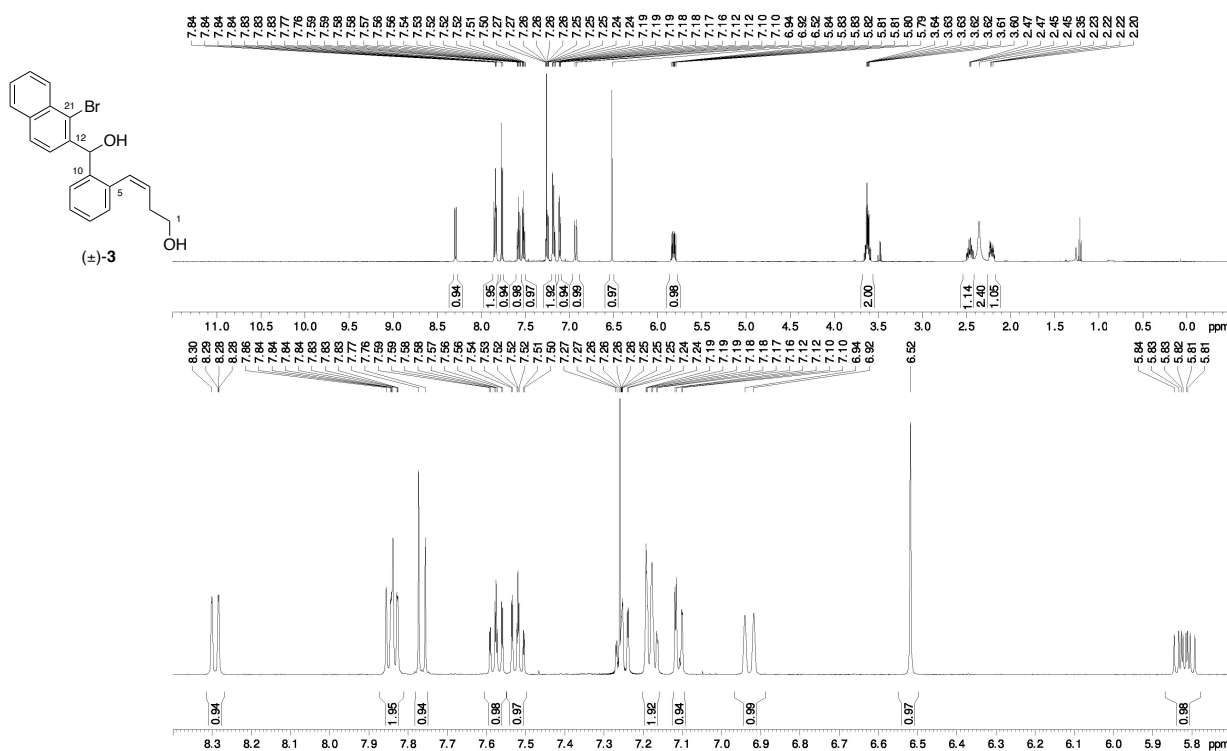

**3**,  $^{13}\text{C}$  NMR (126 MHz,  $\text{CDCl}_3$ ):

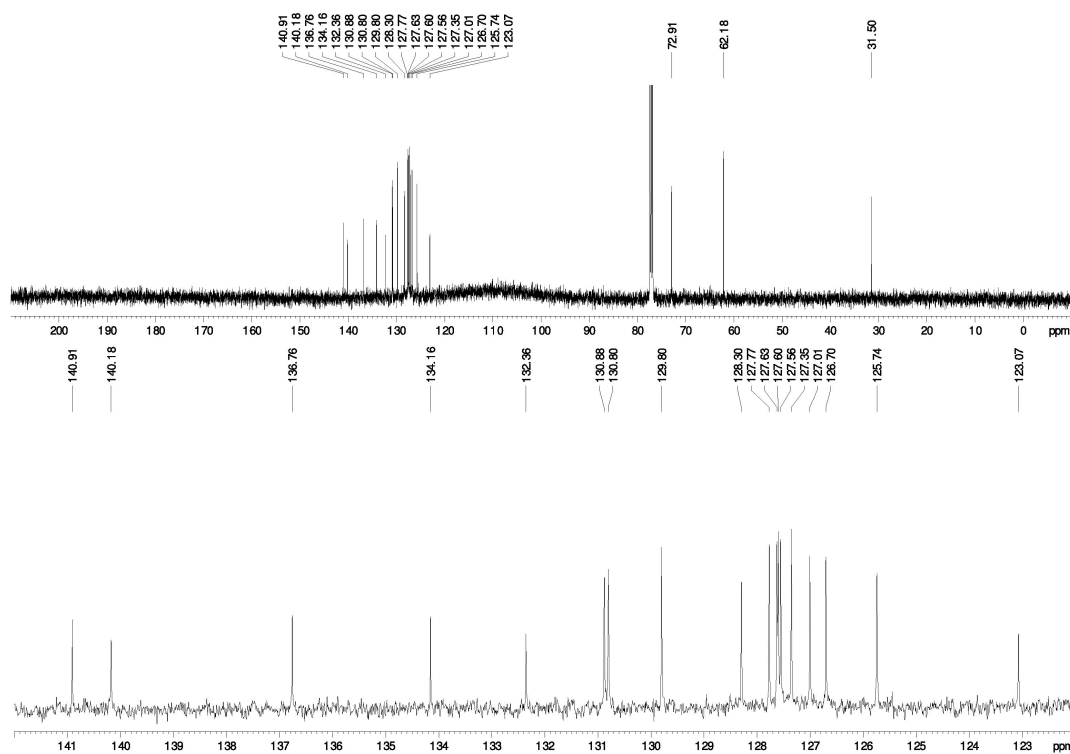

Chemical structure of compound **6** is shown. The structure features a chiral center with a hydroxyl group, a 2-bromo-1-phenylethyl group, and a 2-allylphenyl group. The NMR spectra show peaks from 0 to 8 ppm with integration values and chemical shift labels.

**<sup>1</sup>H NMR (CDCl<sub>3</sub>) Spectrum:**

- Chemical shift range: 0.42 to 8.42 ppm.
- Integration values: 0.96, 1.05, 1.94, 1.99, 1.07, 2.16, 2.01, 0.95, 0.94, 1.00, 0.97, 1.00, 1.99, 1.42, 1.55, 1.23, 5.86, 5.80, 5.78, 5.44, 5.43, 5.42, 5.41, 5.40, 5.41, 5.40, 5.39, 5.38, 5.37, 5.36, 5.35, 5.34, 5.33, 5.32, 5.31, 5.30, 5.29, 5.28, 5.27, 5.26, 5.25, 5.24, 5.23, 5.22, 5.21, 5.20, 5.19, 5.18, 5.17, 5.16, 5.15, 5.14, 5.13, 5.12, 5.11, 5.10, 5.09, 5.08, 5.07, 5.06, 5.05, 5.04, 5.03, 5.02, 5.01, 5.00, 4.99, 4.98, 4.97, 4.96, 4.95, 4.94, 4.93, 4.92, 4.91, 4.90, 4.89, 4.88, 4.87, 4.86, 4.85, 4.84, 4.83, 4.82, 4.81, 4.80, 4.79, 4.78, 4.77, 4.76, 4.75, 4.74, 4.73, 4.72, 4.71, 4.70, 4.69, 4.68, 4.67, 4.66, 4.65, 4.64, 4.63, 4.62, 4.61, 4.60, 4.59, 4.58, 4.57, 4.56, 4.55, 4.54, 4.53, 4.52, 4.51, 4.50, 4.49, 4.48, 4.47, 4.46, 4.45, 4.44, 4.43, 4.42, 4.41, 4.40, 4.39, 4.38, 4.37, 4.36, 4.35, 4.34, 4.33, 4.32, 4.31, 4.30, 4.29, 4.28, 4.27, 4.26, 4.25, 4.24, 4.23, 4.22, 4.21, 4.20, 4.19, 4.18, 4.17, 4.16, 4.15, 4.14, 4.13, 4.12, 4.11, 4.10, 4.09, 4.08, 4.07, 4.06, 4.05, 4.04, 4.03, 4.02, 4.01, 4.00, 3.99, 3.98, 3.97, 3.96, 3.95, 3.94, 3.93, 3.92, 3.91, 3.90, 3.89, 3.88, 3.87, 3.86, 3.85, 3.84, 3.83, 3.82, 3.81, 3.80, 3.79, 3.78, 3.77, 3.76, 3.75, 3.74, 3.73, 3.72, 3.71, 3.70, 3.69, 3.68, 3.67, 3.66, 3.65, 3.64, 3.63, 3.62, 3.61, 3.60, 3.59, 3.58, 3.57, 3.56, 3.55, 3.54, 3.53, 3.52, 3.51, 3.50, 3.49, 3.48, 3.47, 3.46, 3.45, 3.44, 3.43, 3.42, 3.41, 3.40, 3.39, 3.38, 3.37, 3.36, 3.35, 3.34, 3.33, 3.32, 3.31, 3.30, 3.29, 3.28, 3.27, 3.26, 3.25, 3.24, 3.23, 3.22, 3.21, 3.20, 3.19, 3.18, 3.17, 3.16, 3.15, 3.14, 3.13, 3.12, 3.11, 3.10, 3.09, 3.08, 3.07, 3.06, 3.05, 3.04, 3.03, 3.02, 3.01, 3.00, 2.99, 2.98, 2.97, 2.96, 2.95, 2.94, 2.93, 2.92, 2.91, 2.90, 2.89, 2.88, 2.87, 2.86, 2.85, 2.84, 2.83, 2.82, 2.81, 2.80, 2.79, 2.78, 2.77, 2.76, 2.75, 2.74, 2.73, 2.72, 2.71, 2.70, 2.69, 2.68, 2.67, 2.66, 2.65, 2.64, 2.63, 2.62, 2.61, 2.60, 2.59, 2.58, 2.57, 2.56, 2.55, 2.54, 2.53, 2.52, 2.51, 2.50, 2.49, 2.48, 2.47, 2.46, 2.45, 2.44, 2.43, 2.42, 2.41, 2.40, 2.39, 2.38, 2.37, 2.36, 2.35, 2.34, 2.33, 2.32, 2.31, 2.30, 2.29, 2.28, 2.27, 2.26, 2.25, 2.24, 2.23, 2.22, 2.21, 2.20, 2.19, 2.18, 2.17, 2.16, 2.15, 2.14, 2.13, 2.12, 2.11, 2.10, 2.09, 2.08, 2.07, 2.06, 2.05, 2.04, 2.03, 2.02, 2.01, 2.00, 1.99, 1.98, 1.97, 1.96, 1.95, 1.94, 1.93, 1.92, 1.91, 1.90, 1.89, 1.88, 1.87, 1.86, 1.85, 1.84, 1.83, 1.82, 1.81, 1.80, 1.79, 1.78, 1.77, 1.76, 1.75, 1.74, 1.73, 1.72, 1.71, 1.70, 1.69, 1.68, 1.67, 1.66, 1.65, 1.64, 1.63, 1.62, 1.61, 1.60, 1.59, 1.58, 1.57, 1.56, 1.55, 1.54, 1.53, 1.52, 1.51, 1.50, 1.49, 1.48, 1.47, 1.46, 1.45, 1.44, 1.43, 1.42, 1.41, 1.40, 1.39, 1.38, 1.37, 1.36, 1.35, 1.34, 1.33, 1.32, 1.31, 1.30, 1.29, 1.28, 1.27, 1.26, 1.25, 1.24, 1.23, 1.22, 1.21, 1.20, 1.19, 1.18, 1.17, 1.16, 1.15, 1.14, 1.13, 1.12, 1.11, 1.10, 1.09, 1.08, 1.07, 1.06, 1.05, 1.04, 1.03, 1.02, 1.01, 1.00, 0.99, 0.98, 0.97, 0.96, 0.95, 0.94, 0.93, 0.92, 0.91, 0.90, 0.89, 0.88, 0.87, 0.86, 0.85, 0.84, 0.83, 0.82, 0.81, 0.80, 0.79, 0.78, 0.77, 0.76, 0.75, 0.74, 0.73, 0.72, 0.71, 0.70, 0.69, 0.68, 0.67, 0.66, 0.65, 0.64, 0.63, 0.62, 0.61, 0.60, 0.59, 0.58, 0.57, 0.56, 0.55, 0.54, 0.53, 0.52, 0.51, 0.50, 0.49, 0.48, 0.47, 0.46, 0.45, 0.44, 0.43, 0.42, 0.41, 0.40, 0.39, 0.38, 0.37, 0.36, 0.35, 0.34, 0.33, 0.32, 0.31, 0.30, 0.29, 0.28, 0.27, 0.26, 0.25, 0.24, 0.23, 0.22, 0.21, 0.20, 0.19, 0.18, 0.17, 0.16, 0.15, 0.14, 0.13, 0.12, 0.11, 0.10, 0.09, 0.08, 0.07, 0.06, 0.05, 0.04, 0.03, 0.02, 0.01, 0.00, -0.01, -0.02, -0.03, -0.04, -0.05, -0.06, -0.07, -0.08, -0.09, -0.10, -0.11, -0.12, -0.13, -0.14, -0.15, -0.16, -0.17, -0.18, -0.19, -0.20, -0.21, -0.22, -0.23, -0.24, -0.25, -0.26, -0.27, -0.28, -0.29, -0.30, -0.31, -0.32, -0.33, -0.34, -0.35, -0.36, -0.37, -0.38, -0.39, -0.40, -0.41, -0.42, -0.43, -0.44, -0.45, -0.46, -0.47, -0.48, -0.49, -0.50, -0.51, -0.52, -0.53, -0.54, -0.55, -0.56, -0.57, -0.58, -0.59, -0.60, -0.61, -0.62, -0.63, -0.64, -0.65, -0.66, -0.67, -0.68, -0.69, -0.70, -0.71, -0.72, -0.73, -0.74, -0.75, -0.76, -0.77, -0.78, -0.79, -0.80

Top Spectrum (Full):

- 141.44, 138.30, 137.54, 137.28, 136.96, 133.10, 132.54, 131.98, 130.47, 130.03, 129.31, 128.54, 128.22, 127.76, 127.66, 127.40, 127.30, 127.26, 127.11, 126.82, 126.06, 125.94, 124.71, 124.51
- 141.44, 138.30, 137.54, 137.28, 136.96, 133.10, 132.54, 131.98, 130.47, 130.03, 129.31, 128.54, 128.22, 127.76, 127.66, 127.40, 127.30, 127.26, 127.11, 126.82, 126.06, 125.94, 124.71, 124.51

Bottom Spectrum (Expansion):

- 141.44, 138.30, 137.54, 137.28, 136.96, 133.10, 132.54, 131.98, 130.47, 130.03, 129.31, 128.54, 128.22, 127.76, 127.66, 127.40, 127.30, 127.26, 127.11, 126.82, 126.06, 125.94, 124.71, 124.51

(*R<sub>a</sub>*,*S<sub>a</sub>*)-7, <sup>1</sup>H NMR (500 MHz, CDCl<sub>3</sub>):

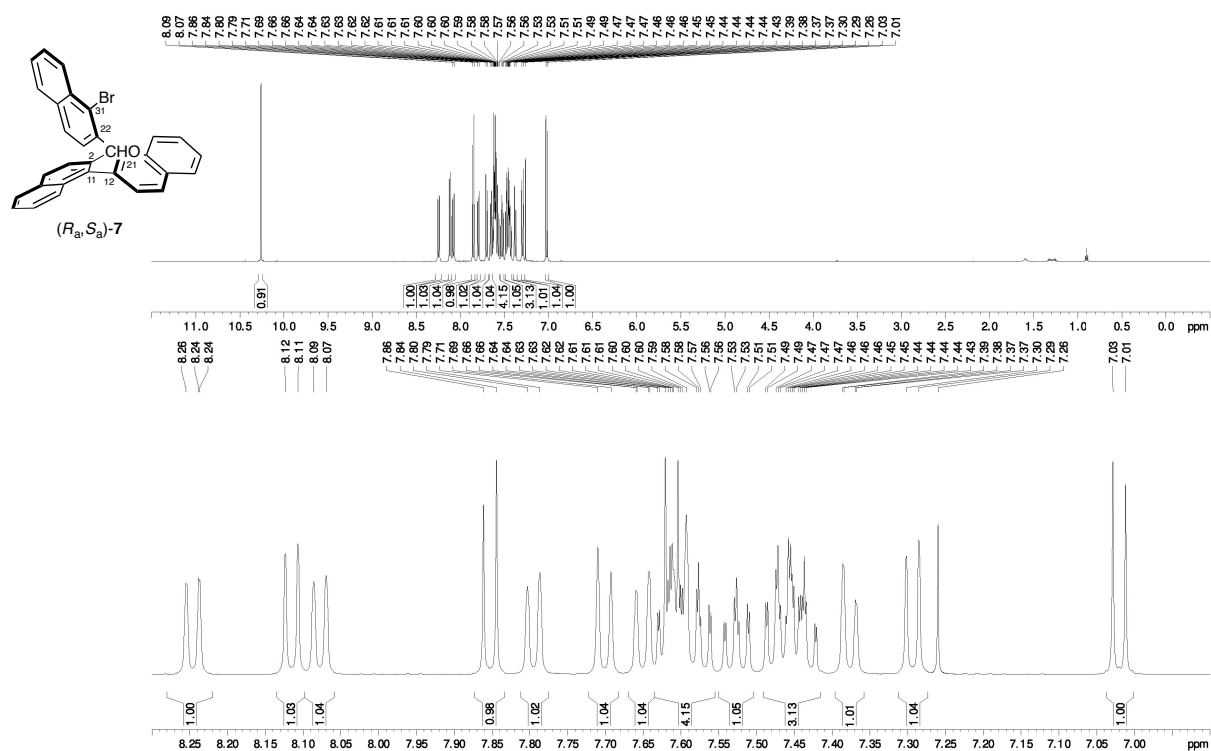

(*R<sub>a</sub>*,*S<sub>a</sub>*)-7, <sup>13</sup>C NMR (126 MHz, CDCl<sub>3</sub>):

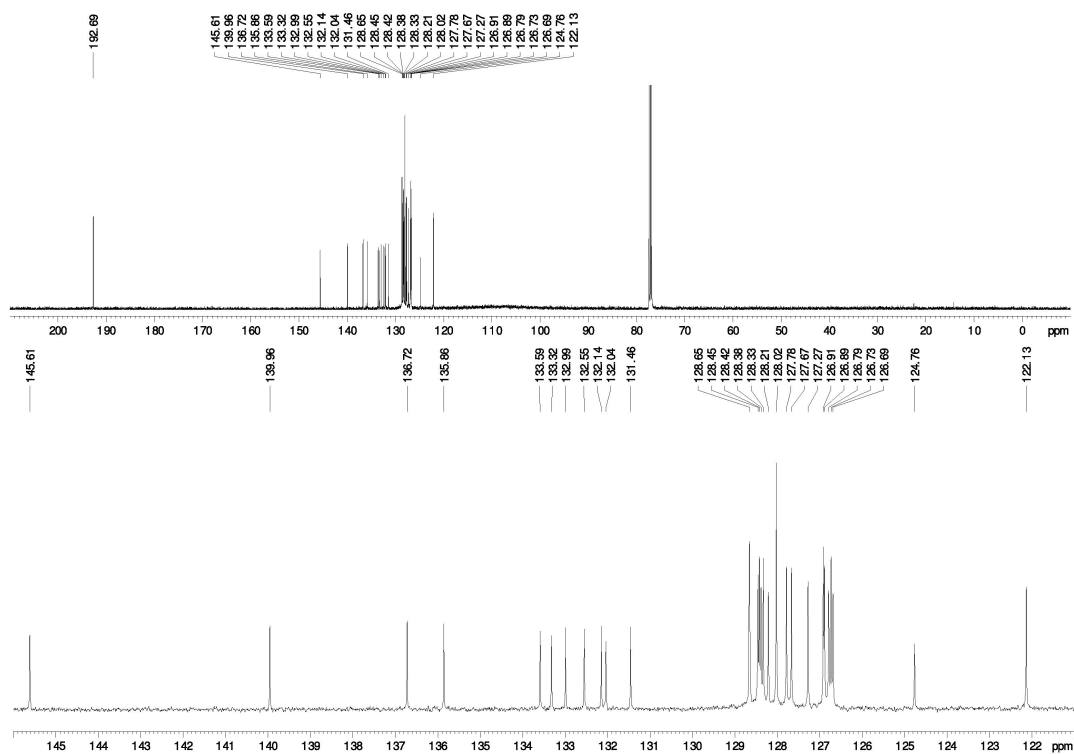

(*S<sub>a</sub>*,*S<sub>a</sub>*)-8, <sup>1</sup>H NMR (500 MHz, CDCl<sub>3</sub>):

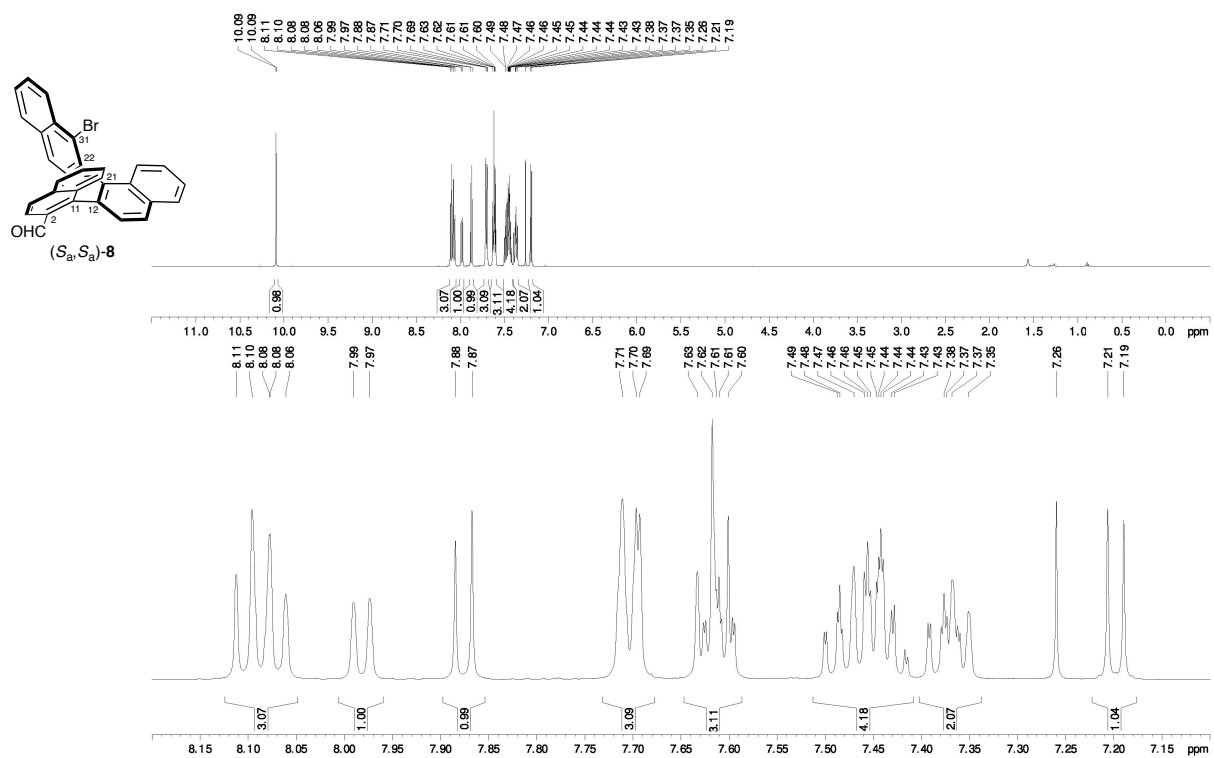

(*S<sub>a</sub>*,*S<sub>a</sub>*)-8, <sup>13</sup>C NMR (126 MHz, CDCl<sub>3</sub>):

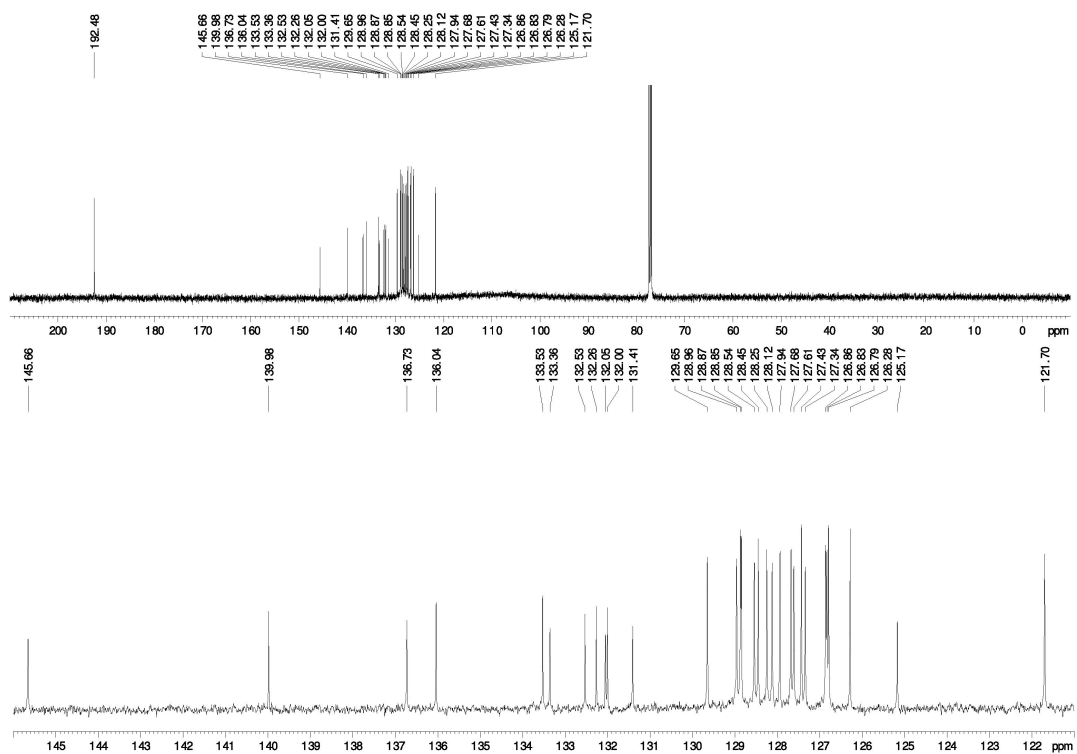

**Diol C**,  $^1\text{H}$  NMR (500 MHz,  $\text{CDCl}_3$ ):

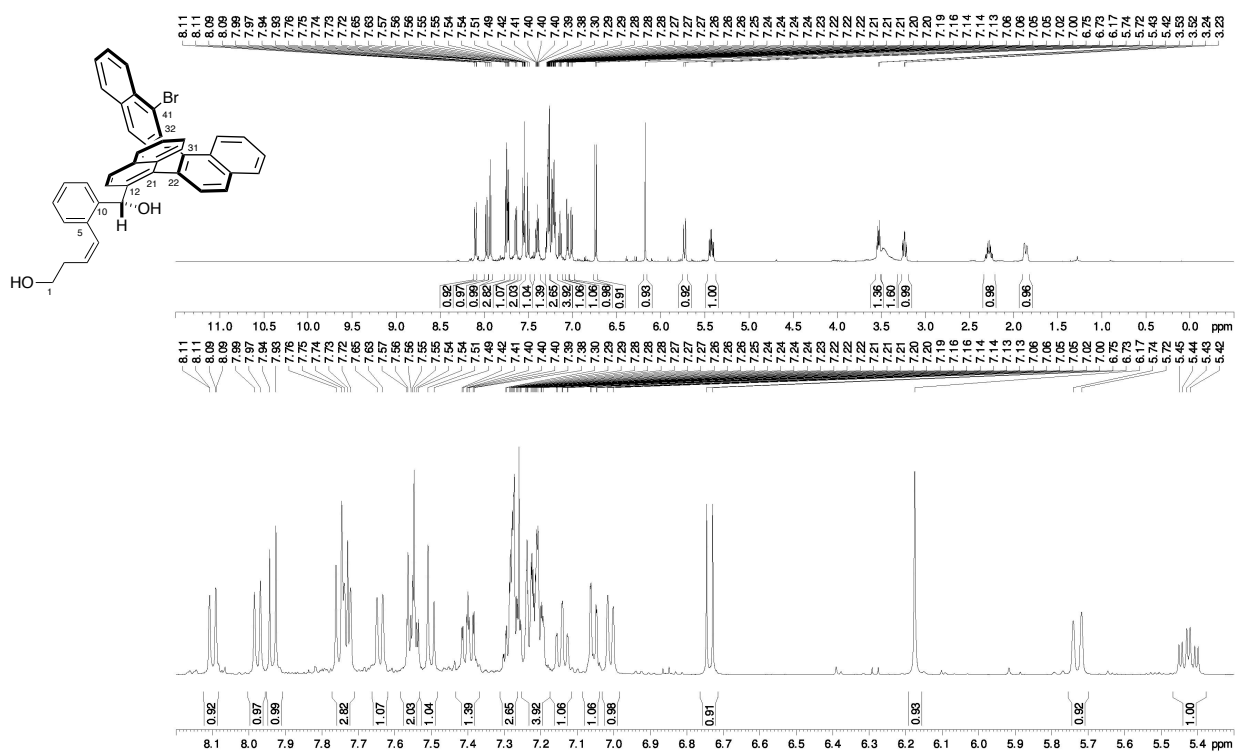

**Diol C**,  $^{13}\text{C}$  NMR (126 MHz,  $\text{CDCl}_3$ ):

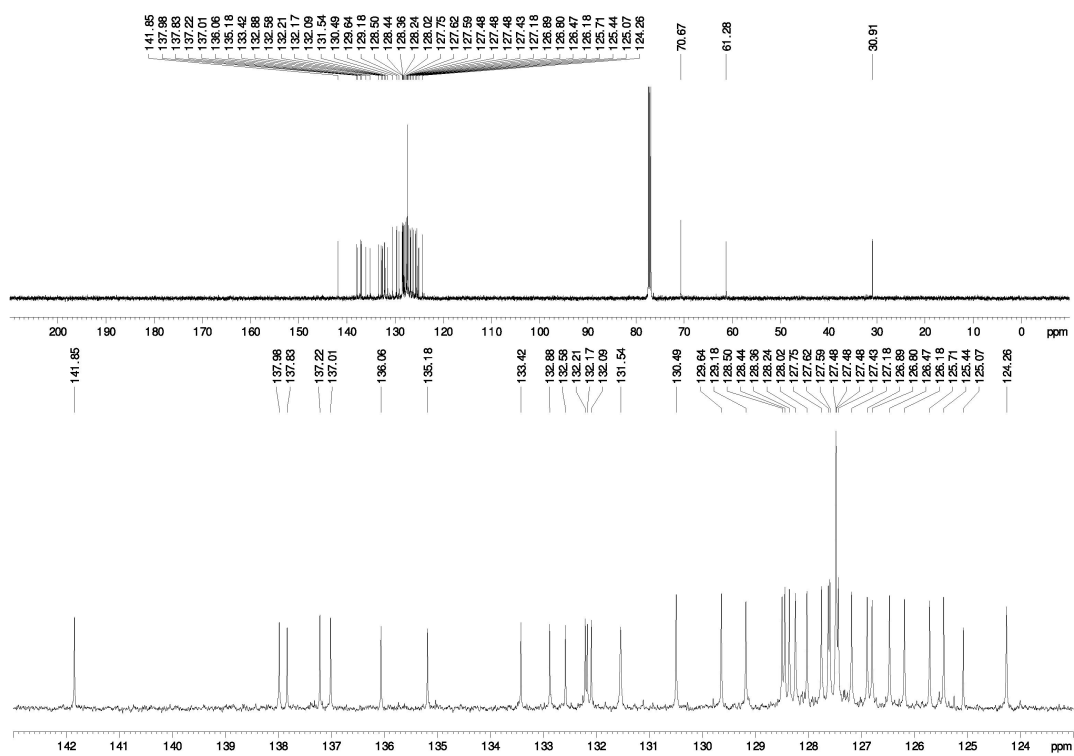

**Diol C**,  $^1\text{H}$  NMR (500 MHz,  $\text{C}_6\text{D}_6$ ):

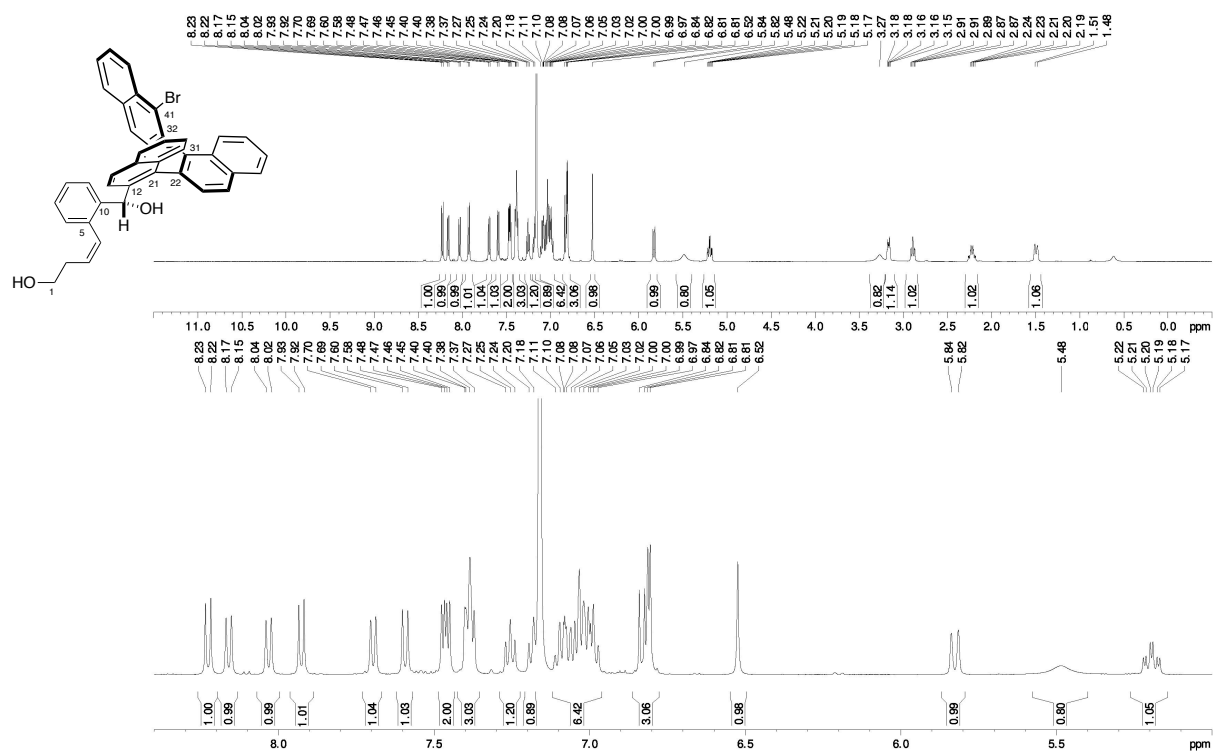

**Diol C**,  $^{13}\text{C}$  NMR (126 MHz,  $\text{C}_6\text{D}_6$ ):

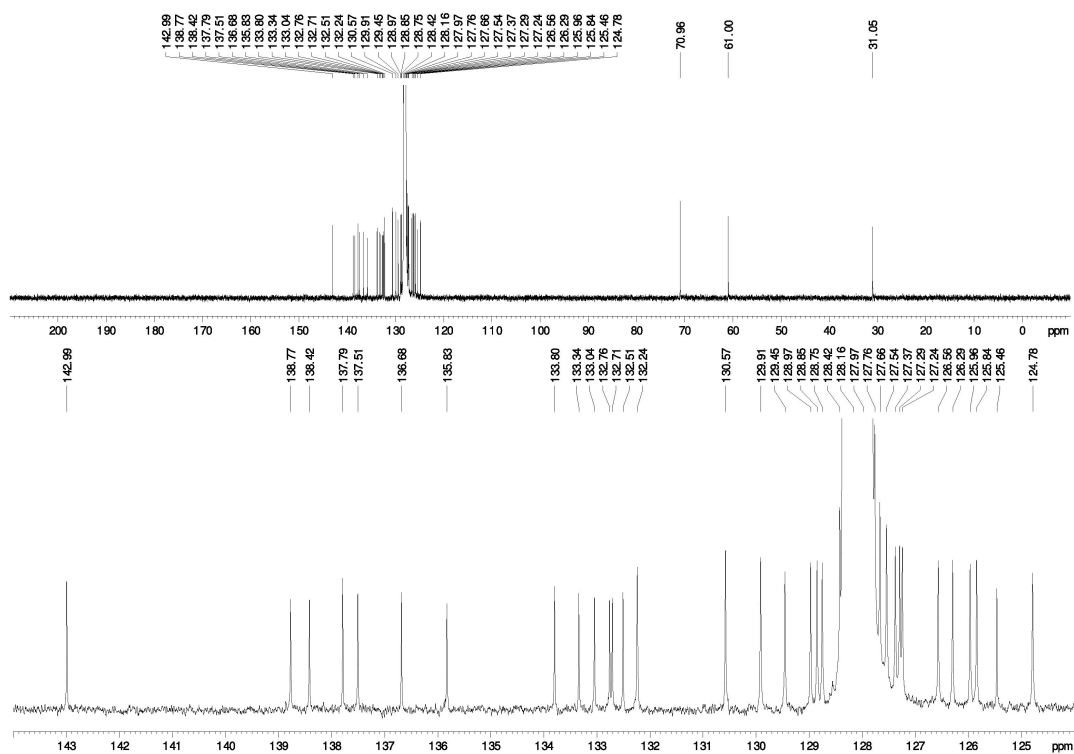

(*R*<sub>a</sub>,*S*<sub>a</sub>,*S*<sub>a</sub>)-13, <sup>1</sup>H NMR (500 MHz, CDCl<sub>3</sub>):

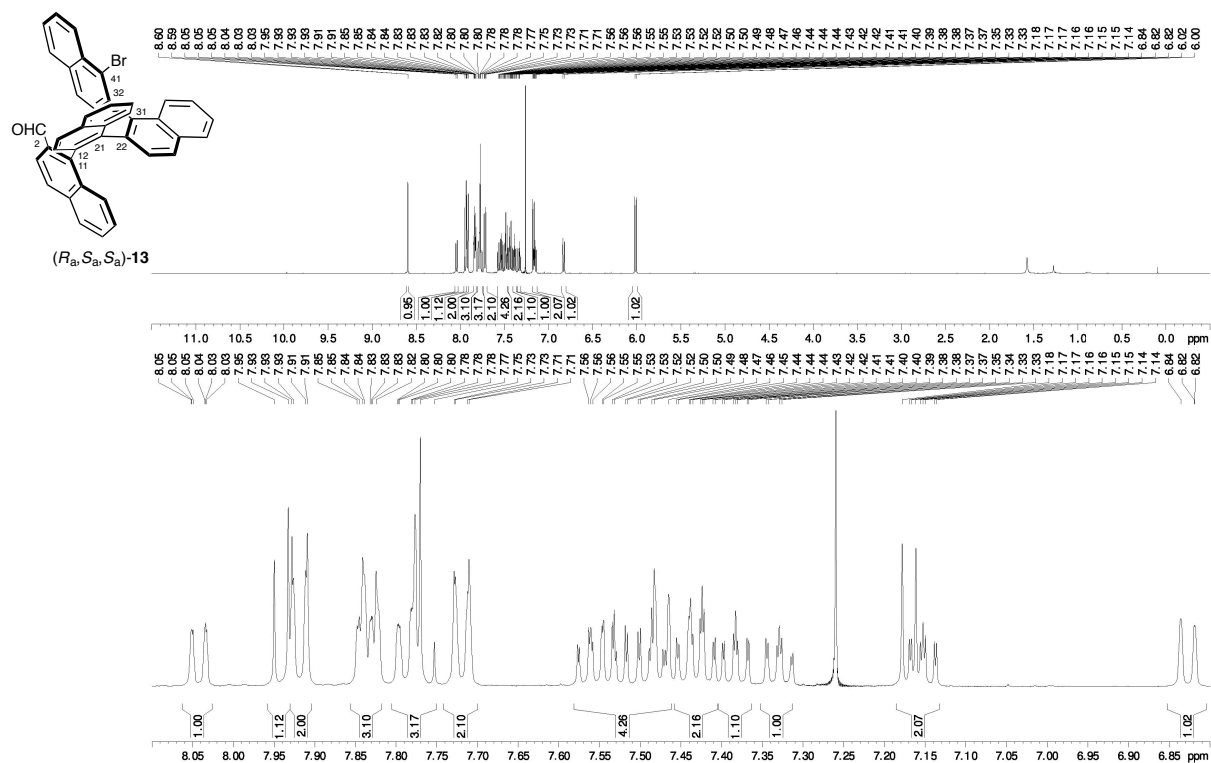

(*R*<sub>a</sub>,*S*<sub>a</sub>,*S*<sub>a</sub>)-13, <sup>13</sup>C NMR (126 MHz, CDCl<sub>3</sub>):

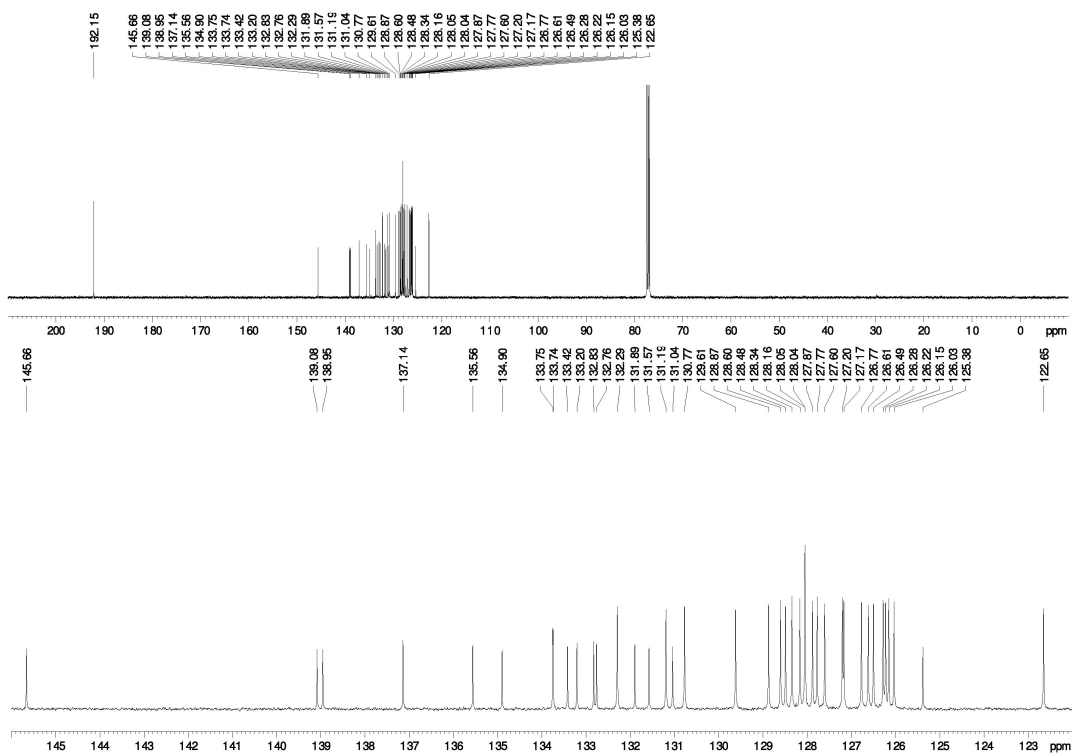

(*S<sub>a</sub>*,*S<sub>a</sub>*,*S<sub>a</sub>*)-14, <sup>1</sup>H NMR (500 MHz, CDCl<sub>3</sub>):

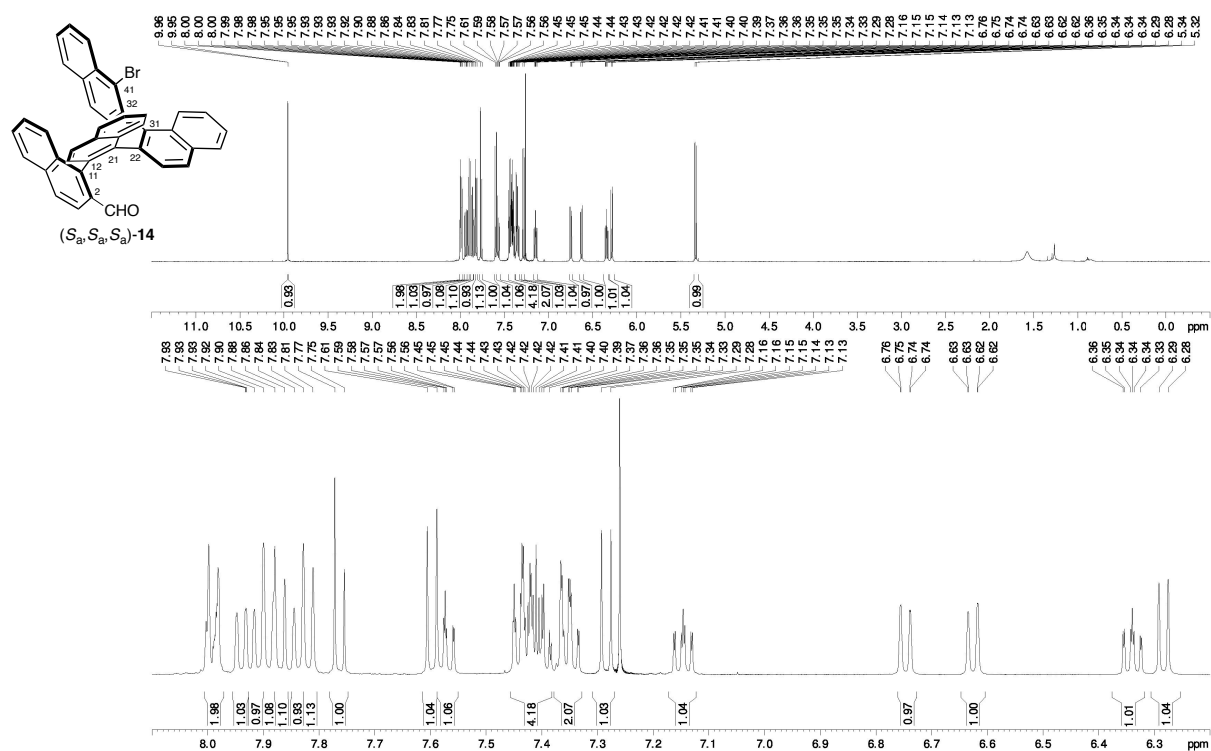

(*S<sub>a</sub>*,*S<sub>a</sub>*,*S<sub>a</sub>*)-14, <sup>13</sup>C NMR (126 MHz, CDCl<sub>3</sub>):

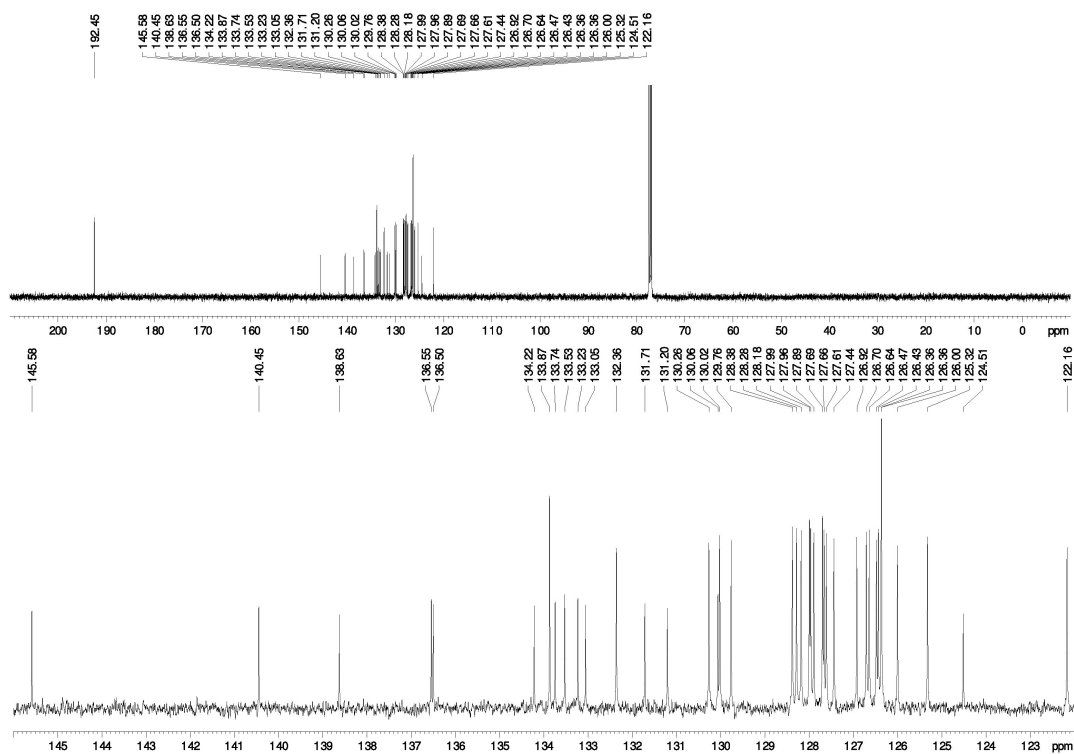

**Diol D**,  $^1\text{H}$  NMR (500 MHz,  $\text{C}_6\text{D}_6$ ):

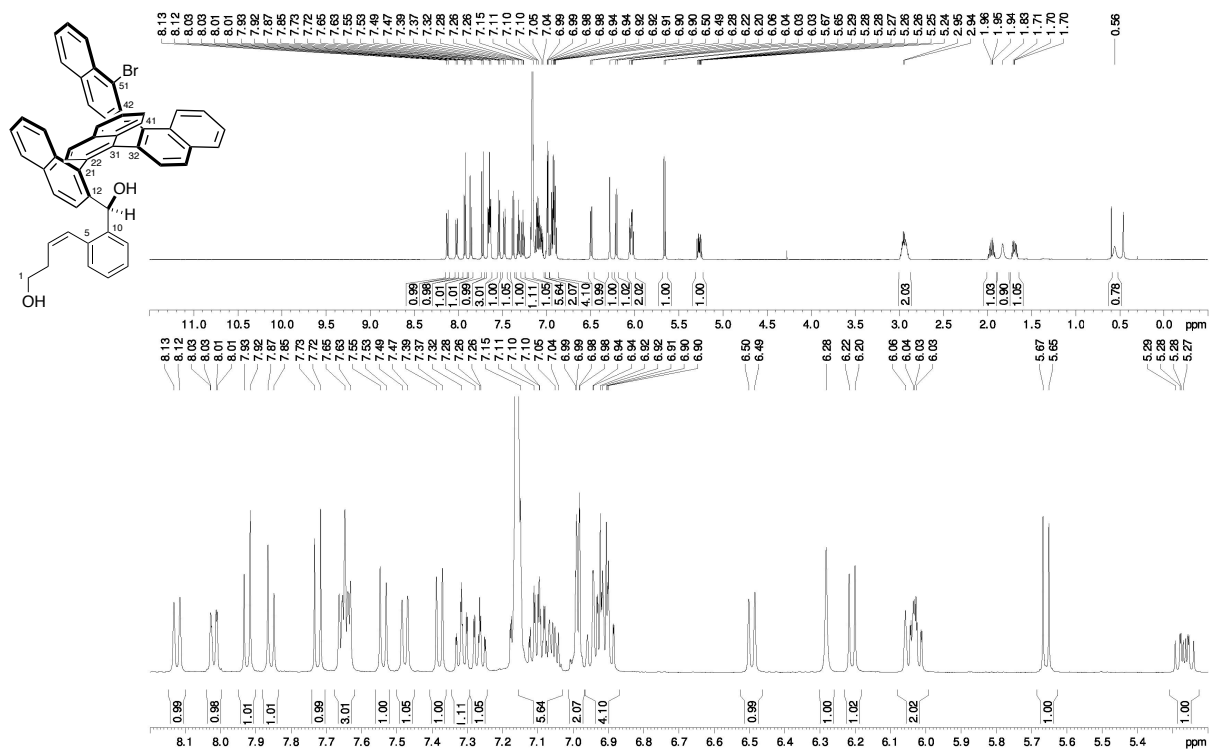

(*R<sub>a</sub>*,*S<sub>a</sub>*,*S<sub>a</sub>*,*S<sub>a</sub>*)-15, <sup>1</sup>H NMR (500 MHz, CDCl<sub>3</sub>):

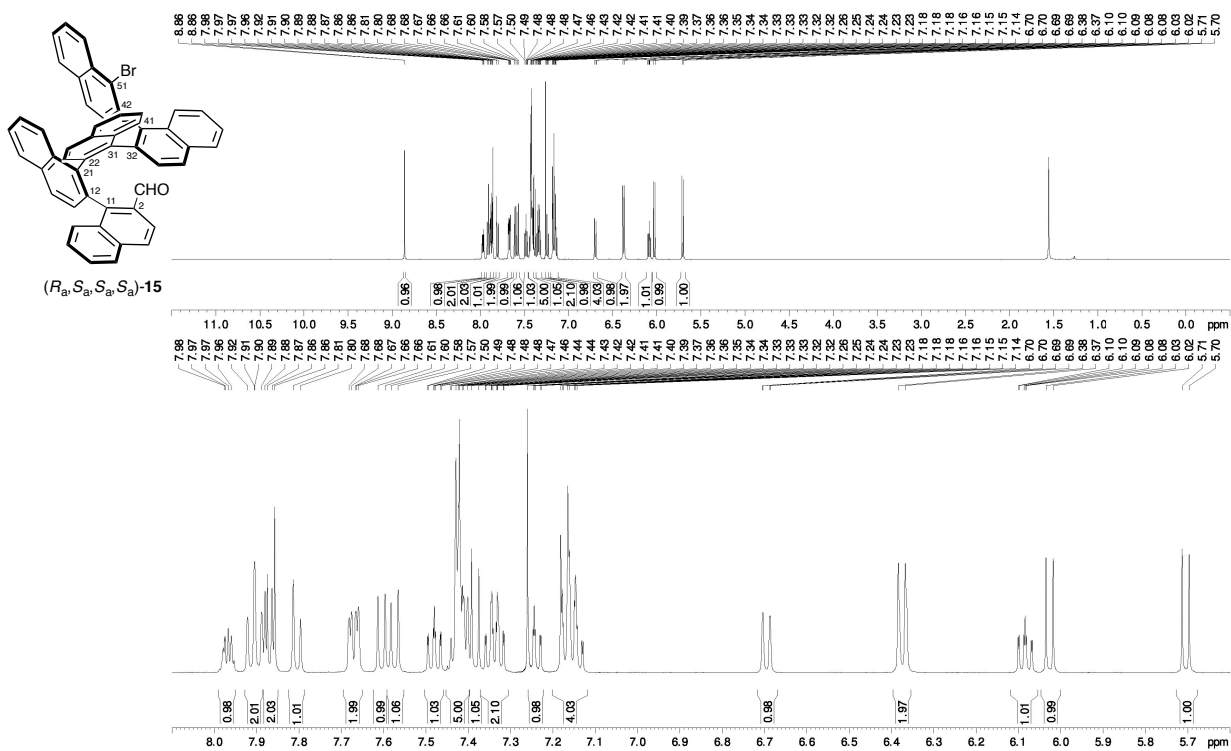

(*R<sub>a</sub>*,*S<sub>a</sub>*,*S<sub>a</sub>*,*S<sub>a</sub>*)-15, <sup>13</sup>C NMR (126 MHz, CDCl<sub>3</sub>):

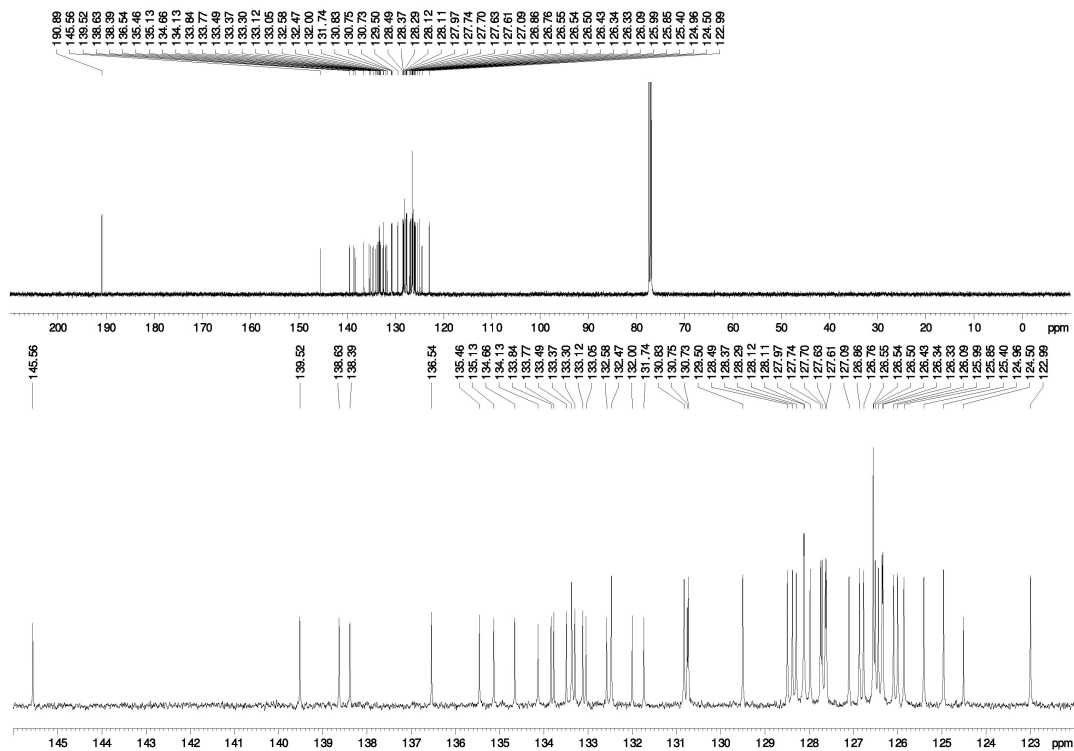

(*S<sub>a</sub>*,*S<sub>a</sub>*,*S<sub>a</sub>*,*S<sub>a</sub>*)-16, <sup>1</sup>H NMR (500 MHz, CDCl<sub>3</sub>):

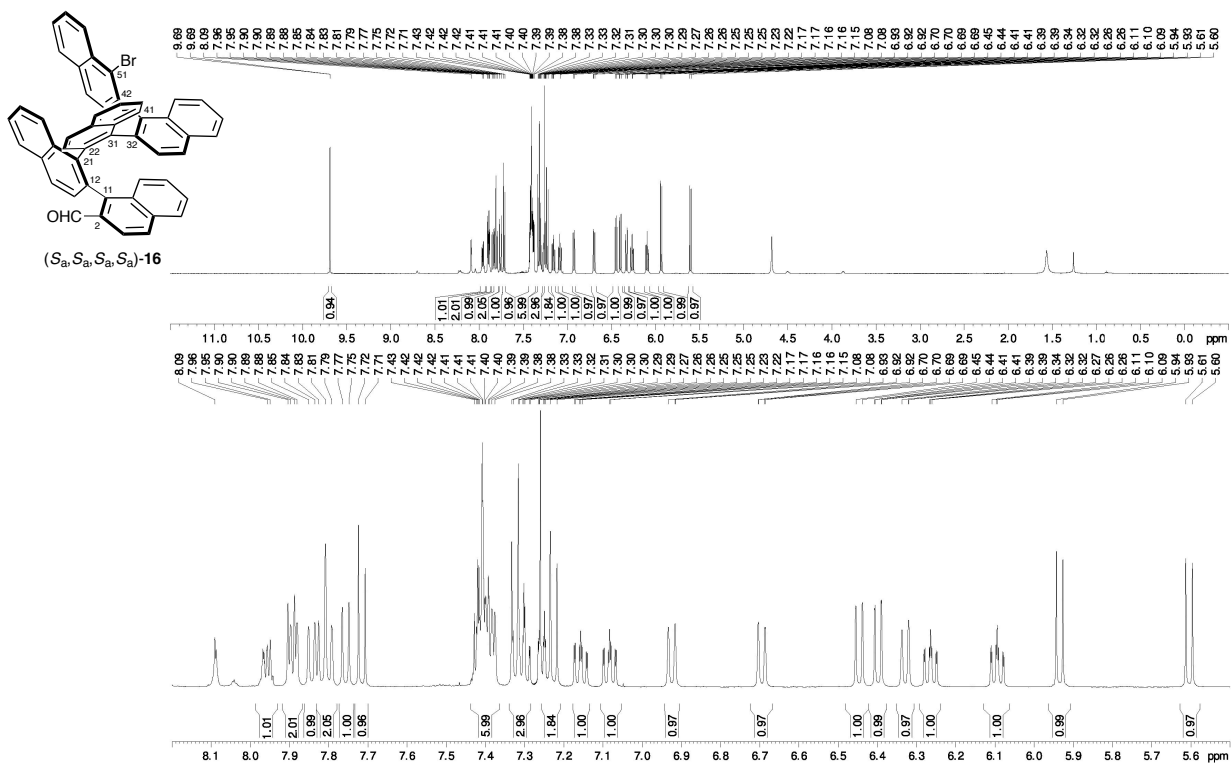

(*S<sub>a</sub>*,*S<sub>a</sub>*,*S<sub>a</sub>*,*S<sub>a</sub>*)-16, <sup>13</sup>C NMR (126 MHz, CDCl<sub>3</sub>):

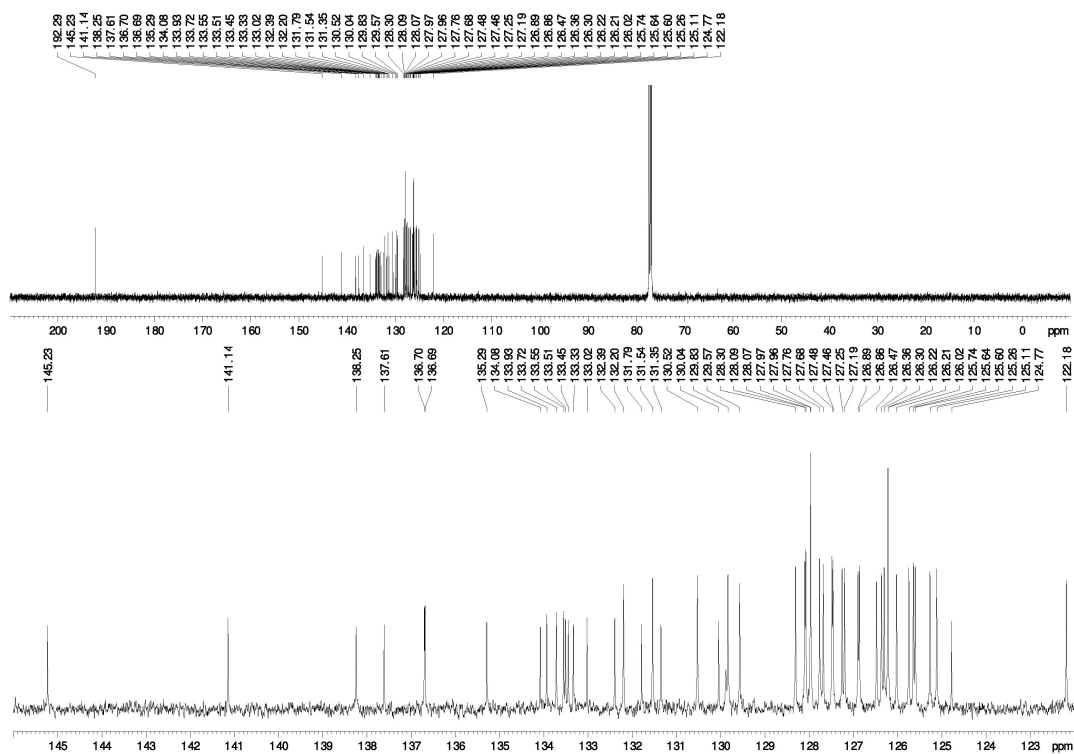

**Diol E, <sup>1</sup>H NMR (500 MHz, C<sub>6</sub>D<sub>6</sub>):**

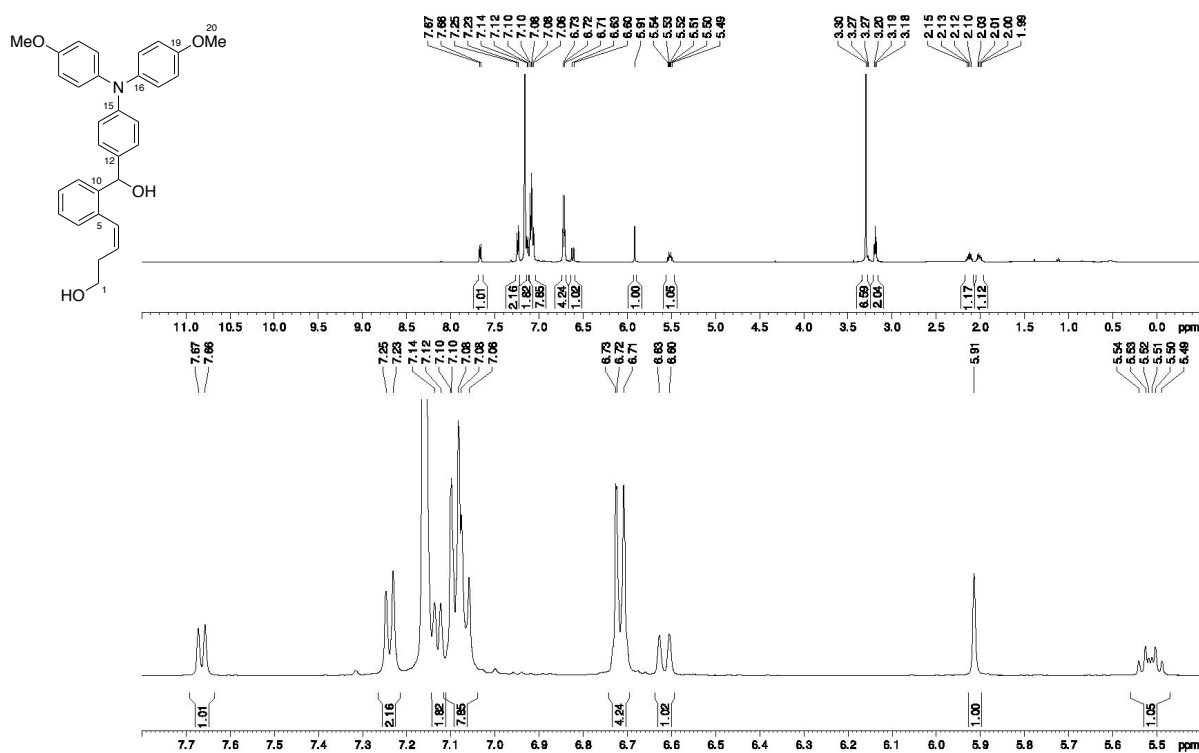

**Diol E,  $^{13}\text{C}$  NMR (126 MHz,  $\text{C}_6\text{D}_6$ ):**

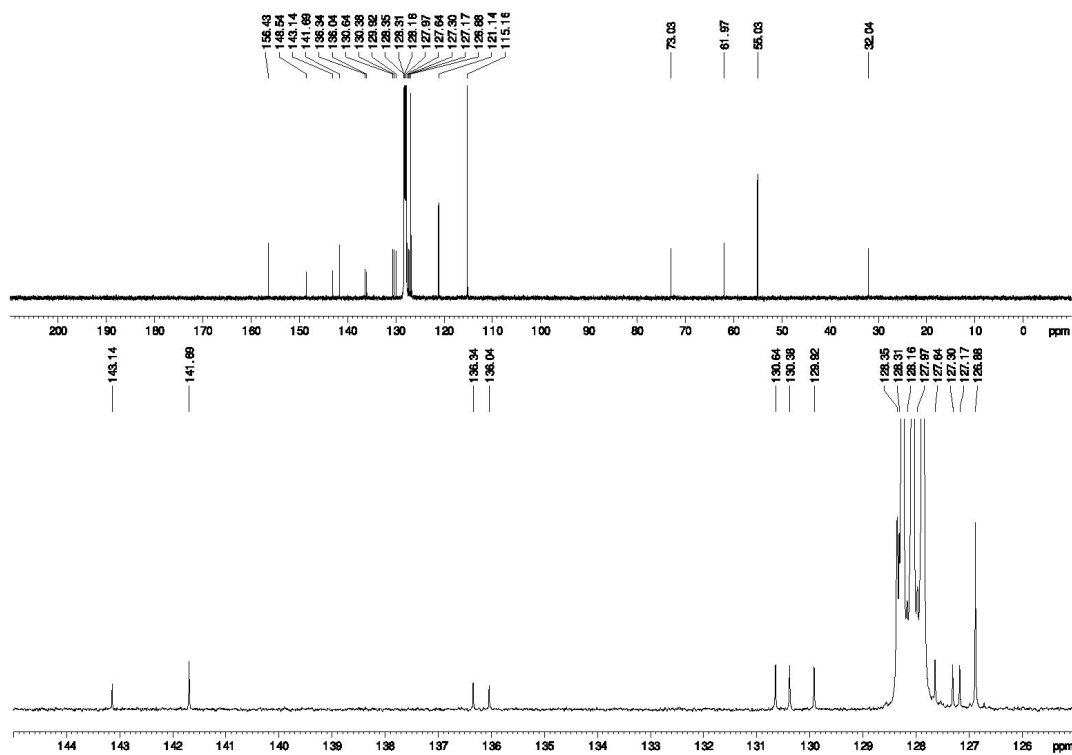

1-(4-(bis(4-methoxyphenyl)amino)phenyl)-2-naphthaldehyde,  $^1\text{H}$  NMR (500 MHz,  $\text{CDCl}_3$ ):

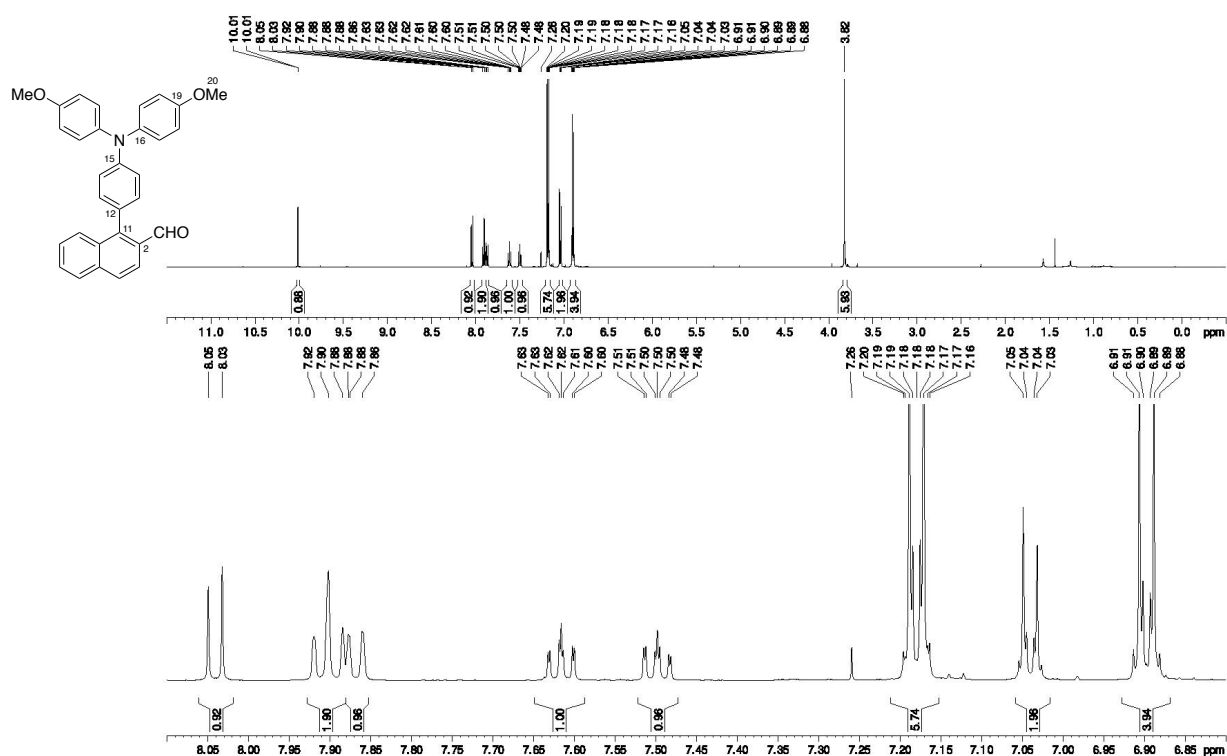

1-(4-(bis(4-methoxyphenyl)amino)phenyl)-2-naphthaldehyde,  $^{13}\text{C}$  NMR (126 MHz,  $\text{CDCl}_3$ ):

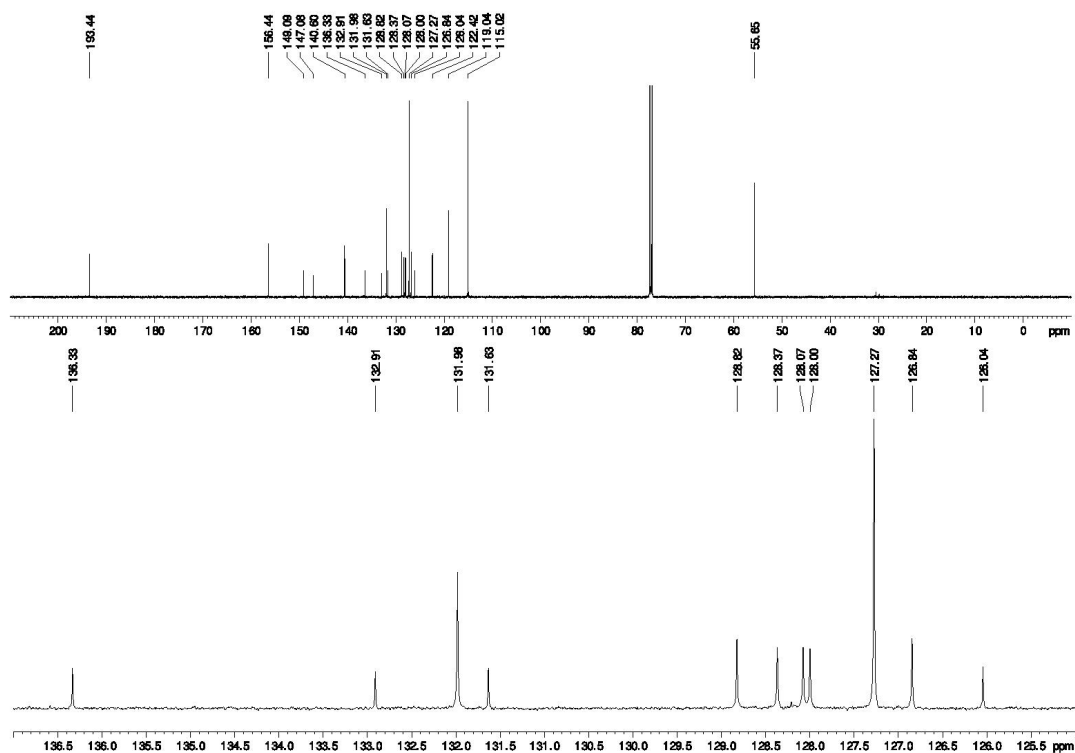

**Diol F,  $^1\text{H}$  NMR (500 MHz,  $\text{C}_6\text{D}_6$ ):**

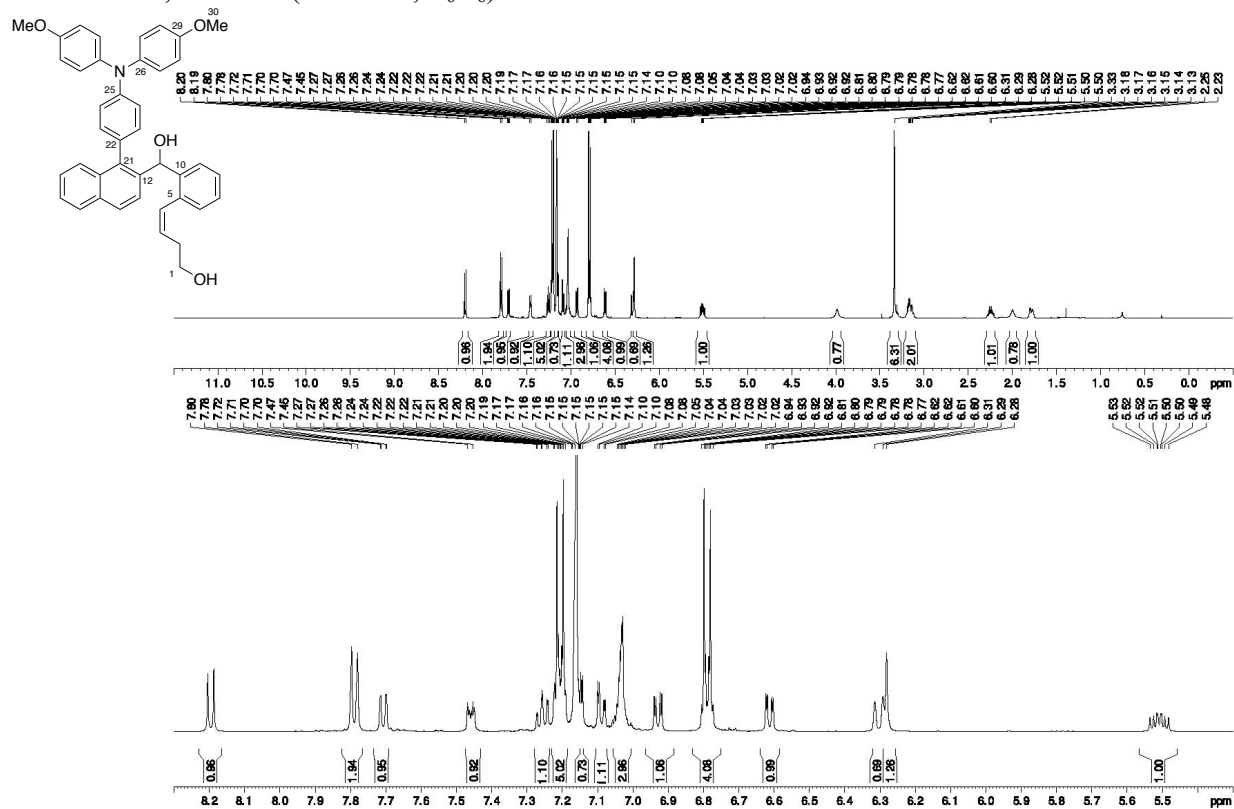

**Diol F,  $^{13}\text{C}$  NMR (126 MHz,  $\text{C}_6\text{D}_6$ ):**

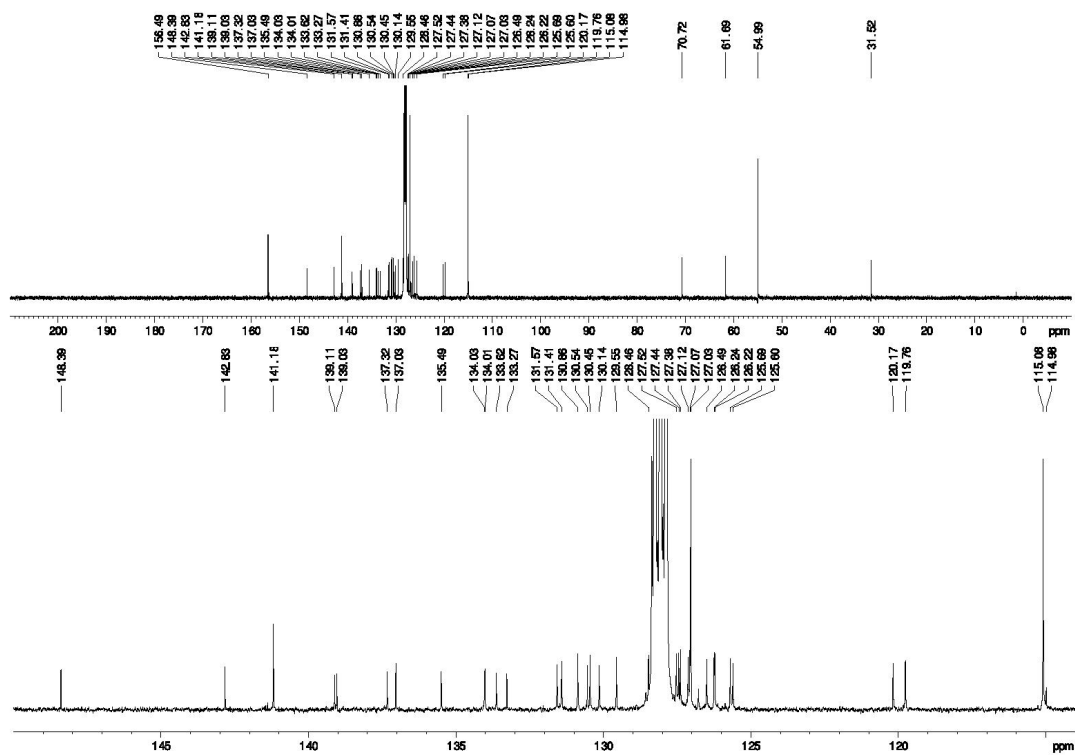

(S<sub>a</sub>)-18, <sup>1</sup>H NMR (500 MHz, CDCl<sub>3</sub>):

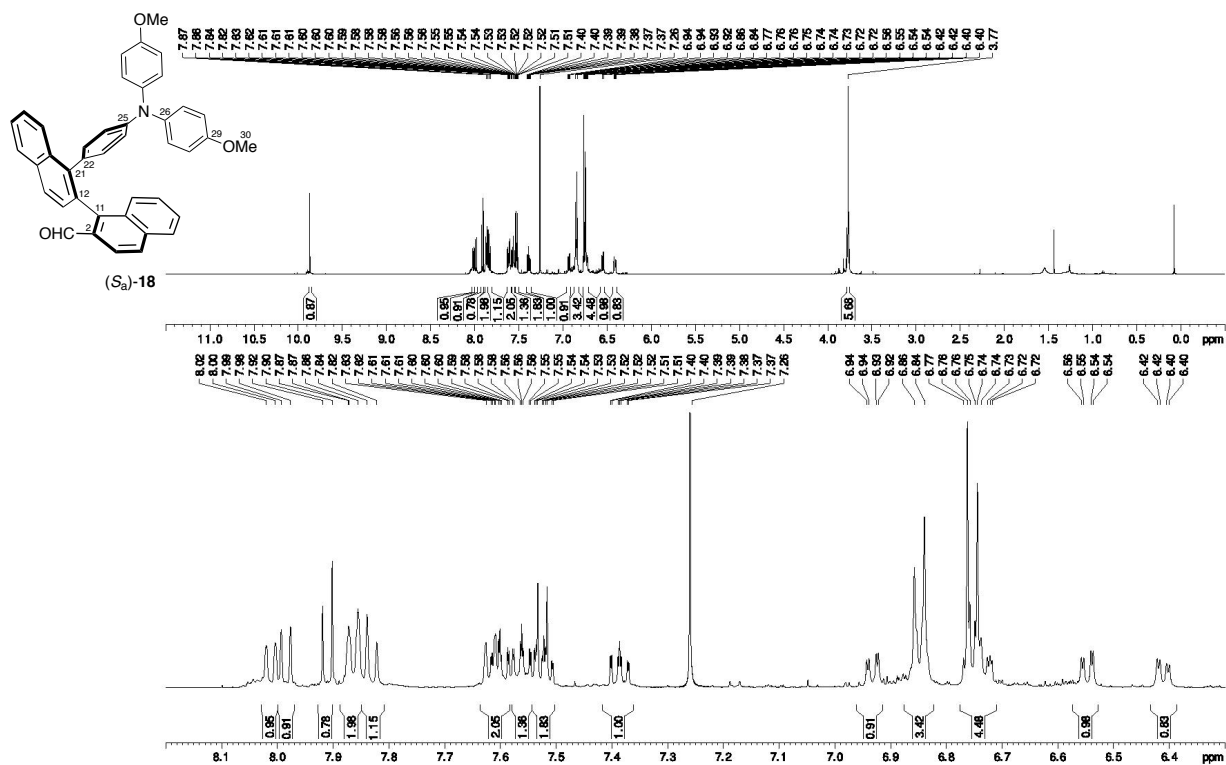

(S<sub>a</sub>)-18, <sup>13</sup>C NMR (126 MHz, CDCl<sub>3</sub>):

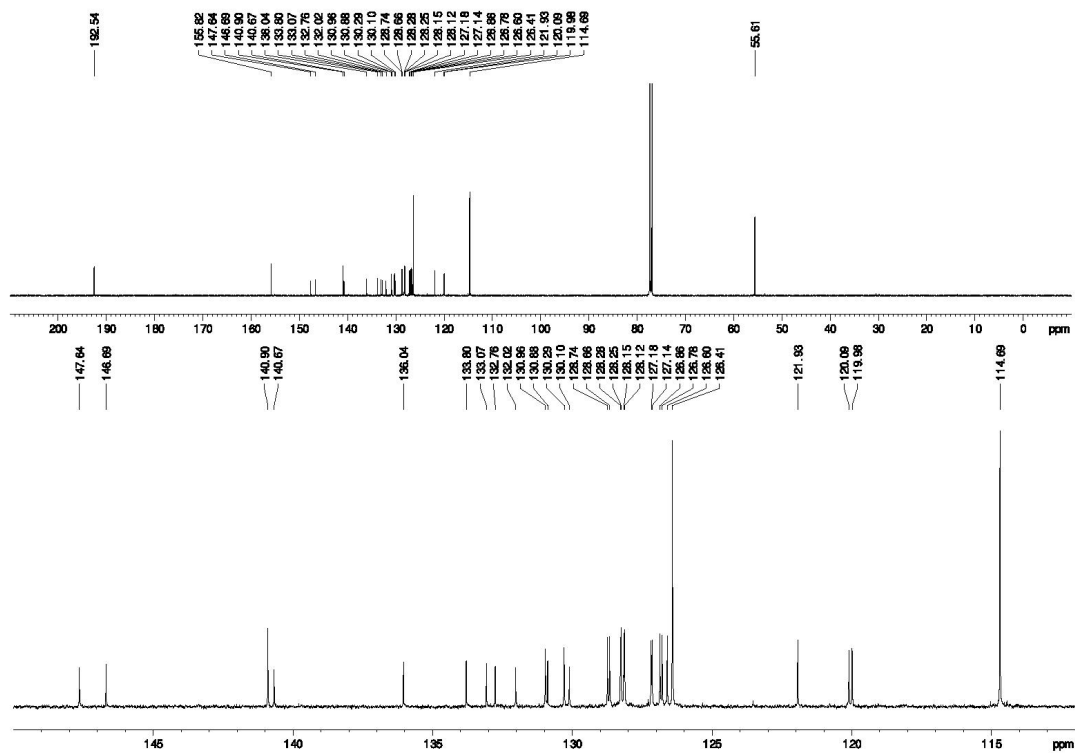

**Diol G**,  $^1\text{H}$  NMR (500 MHz,  $\text{C}_6\text{D}_6$ ):

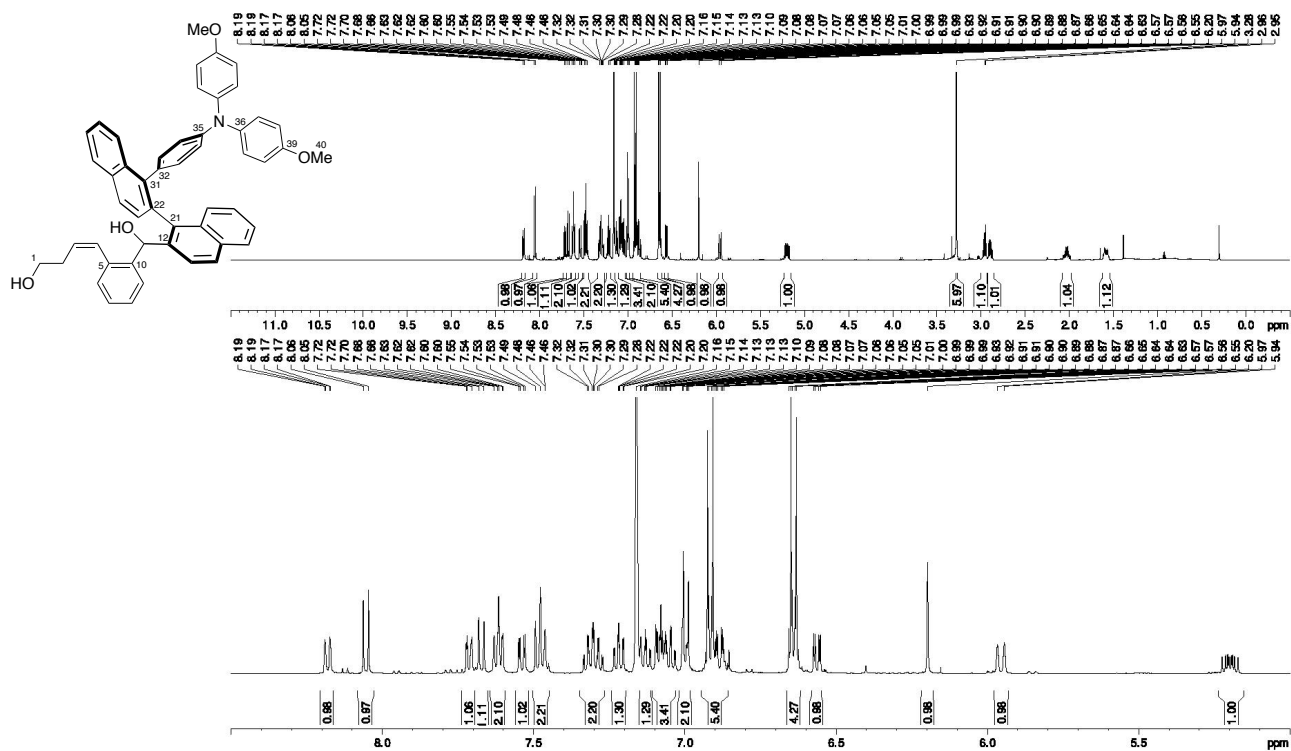

**Diol G**,  $^{13}\text{C}$  NMR (126 MHz,  $\text{C}_6\text{D}_6$ ):



(*R<sub>a</sub>*,*S<sub>a</sub>*)-19, <sup>1</sup>H NMR (500 MHz, C<sub>6</sub>D<sub>6</sub>):

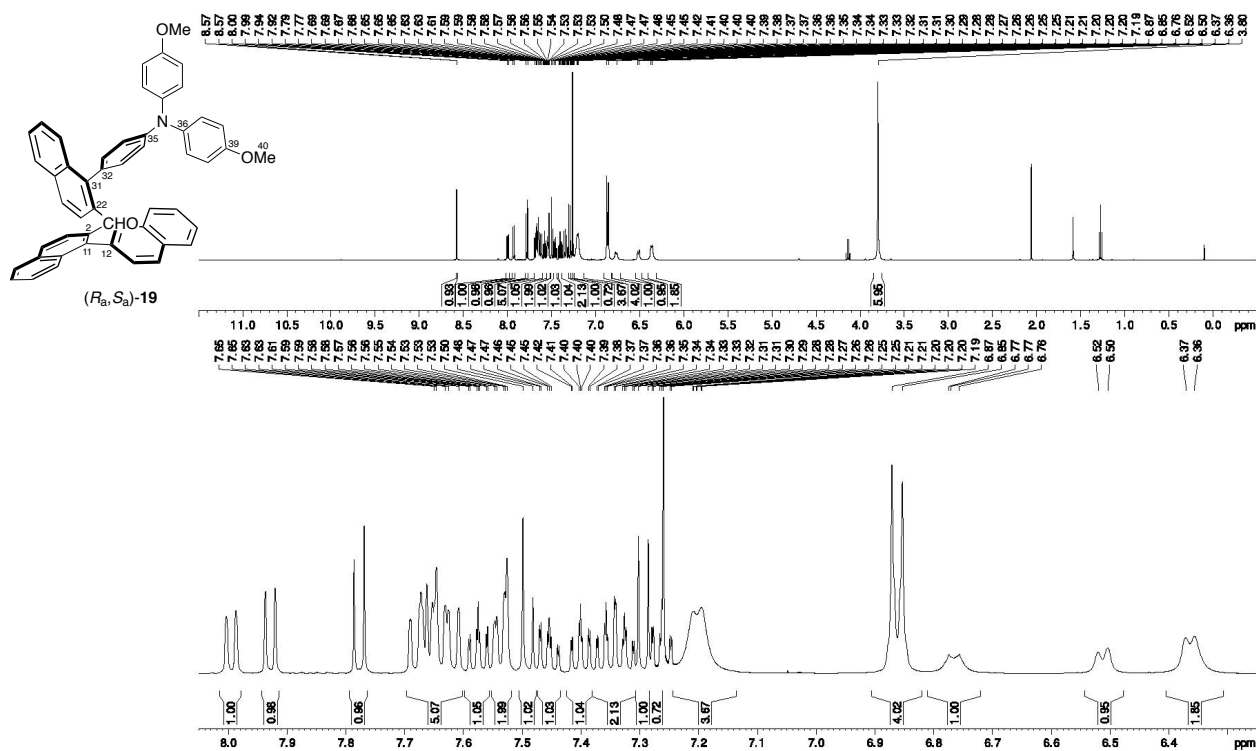

(*R<sub>a</sub>*,*S<sub>a</sub>*)-19, <sup>13</sup>C NMR (126 MHz, CDCl<sub>3</sub>):

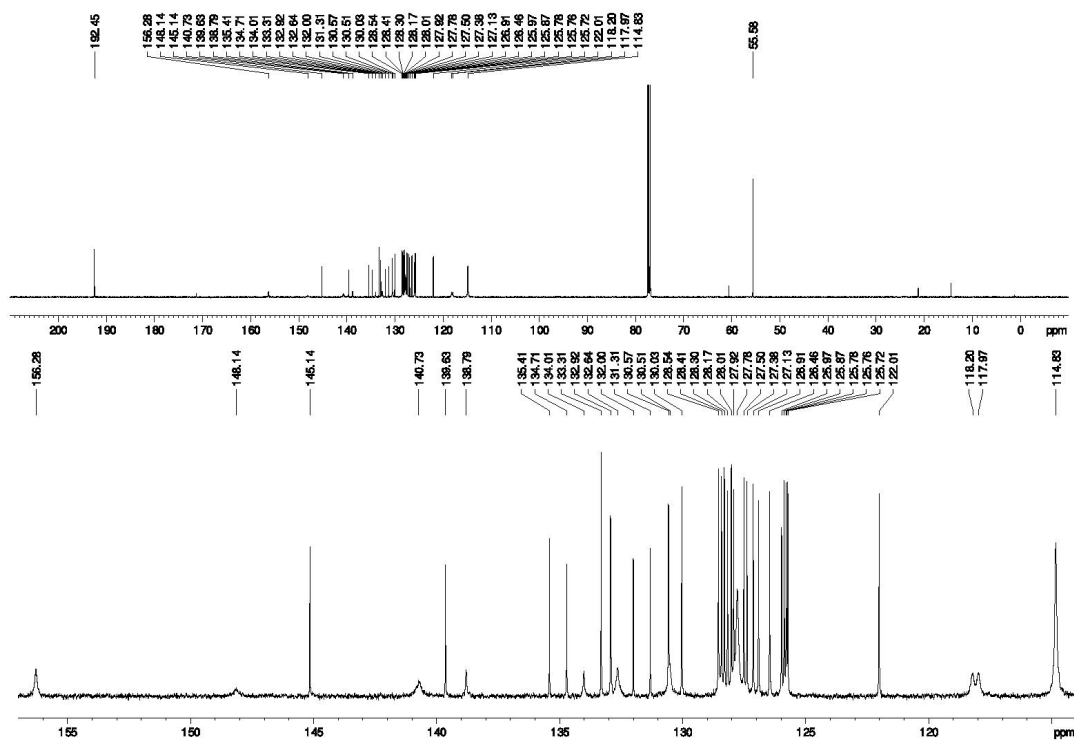

(*S<sub>a</sub>*,*S<sub>a</sub>*)-20, <sup>1</sup>H NMR (500 MHz, C<sub>6</sub>D<sub>6</sub>):

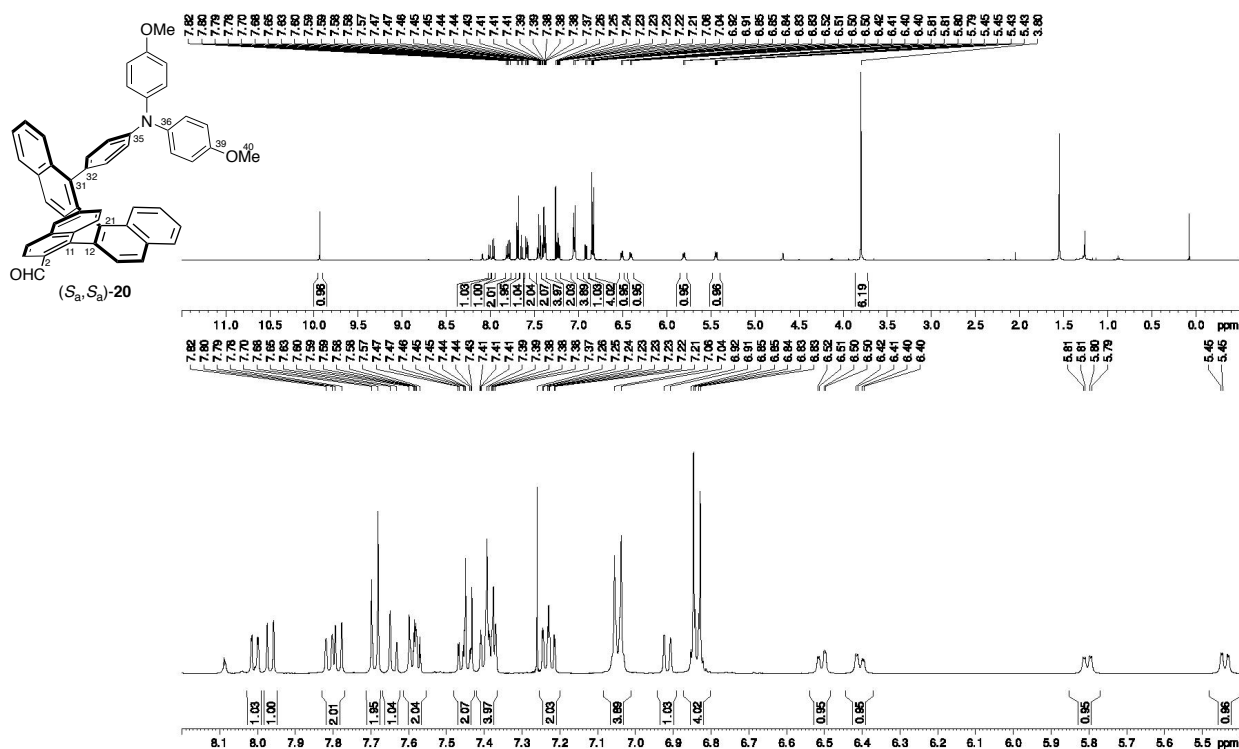

## Literature

- [1] Frigerio, M.; Santagostino, M.; Sputore, S.; A User-Friendly Entry to 2-Iodoxybenzoic Acid (IBX). *J. Org. Chem.* **1999**, *64*, 4537–4538.
- [2] Lotter, D.; Neuburger, M.; Rickhaus, M.; Häussinger, D.; Sparr, C.; Stereoselective Arene-Forming Aldol Condensation: Synthesis of Configurationally Stable Oligo-1,2-naphthylenes. *Angew. Chem. Int. Ed.* **2016**, *55*, 2920–2923.
- [3] Method from: Hellwinkel, D.; Bohnet, S.; Dibenzocycloocten-, Dibenzochalcocin- und Diarenochalcondione. *Chem. Ber.* **1987**, *120*, 1151–1173.
- [4] Moleele, S. S.; Michael, J. P.; de Koning, C. B.; Methodology for the synthesis of 1,2-disubstituted aryl-naphthalenes from  $\alpha$ -tetralones. *Tetrahedron* **2006**, *62*, 2831–2844.
- [5] We thank Prof. M. Waser (JKU Linz) for generously providing catalyst **Cat34** – **Cat44** for our test reactions.
